# Supplementary material for: Synthesis of indolyl pyrroloindolines via a cascade arylation/cyclization of indole acetamides with 3-substituted indoles
Source: Royal Society of Chemistry journal article supplement (doi:10.1039/d4qo01118j), 2024-01-01

# Supporting Information

## Synthesis of indolyl pyrroloindolines via a cascade arylation/cyclization of indole acetamides with 3-substituted indoles

Wei Zhang, Shuai Han, Si-Yi Zhang, Dong-Xiao Jiang, Jinjin Chen, Zhen Wang\*  
and Yao-Fu Zeng\*

School of Pharmaceutical Science, Hengyang Medical School, University of South China,  
Hengyang, Hunan, 421001, China.

### Contents

|                                                                                  |    |
|----------------------------------------------------------------------------------|----|
| 1. General Information .....                                                     | 2  |
| 2. Experimental Section.....                                                     | 2  |
| 2.1 General procedure for the synthesis of starting materials <b>1a-1e</b> ..... | 2  |
| 2.2 Synthesis of Indole Derivatives.....                                         | 2  |
| 2.3 General procedure for the synthesis of products <b>3-5</b> .....             | 4  |
| 2.4 The experimental procedure for the synthesis of product <b>6a</b> .....      | 4  |
| 3. Single crystal X-ray structure of compound <b>3a</b> .....                    | 5  |
| 4. Characterization data of products.....                                        | 6  |
| 5. References .....                                                              | 18 |
| 6. NMR spectra of products.....                                                  | 19 |

## 1. General Information

All reagents were obtained commercially and used without further purification. Column chromatography was performed on silica gel (200-300 mesh). The reported yields are the actual isolated yields of pure products. <sup>1</sup>H NMR spectra were obtained in CDCl<sub>3</sub> or DMSO-*d*<sub>6</sub> at 500 MHz (Bruker Ascend 500). <sup>13</sup>C NMR spectra were obtained at 126 MHz. The following abbreviations are used for the multiplicities: s: singlet, d: doublet, t: triplet, q: quartet, m: multiplet. Coupling constants (*J*) are reported in Hertz (Hz). High-resolution mass spectra (HRMS) were recorded on a waters G2-Xs QTOF mass spectrometer with ESI mode. Analytical thin layer chromatography was performed on Polygram SIL G/UV<sub>254</sub> plates. Visualization was accomplished with short wave UV light.

## 2. Experimental Section

### 2.1 General procedure for the synthesis of starting materials 1a-1e

The starting materials **1a~1e** were synthesized according to the known methods.<sup>[1]</sup>

### 2.2 Synthesis of Indole Derivatives

Various substituted indoles (Substrates **2-1**, **2-14~2-20**, **2-22**, **2-36**) were synthesized using known procedures from literature.<sup>[2]</sup>

Various substituted indoles (Substrates **2-2~2-8**, **2-11~2-13**) were synthesized using known procedures from literature.<sup>[3]</sup>

Various substituted indoles (Substrates **2-9**, **2-10**, **2-21**) were synthesized using known procedures from literature.<sup>[4]</sup>

Various substituted indoles (Substrates **2-28~2-34**, **2-37**) were synthesized using known procedures from literature.<sup>[5]</sup>

1,3-disubstituted indoles (Substrates **2-23**,<sup>[6]</sup> **2-24**,<sup>[7]</sup> **2-25**,<sup>[8]</sup> **2-26**,<sup>[9]</sup> **2-27**,<sup>[10]</sup> **2-35**,<sup>[11]</sup> **2-38**,<sup>[12]</sup> **2-39**<sup>[13]</sup>) were synthesized using known procedures from literatures.

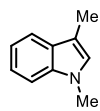

2-1

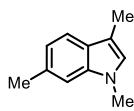

2-2

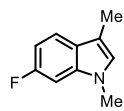

2-3

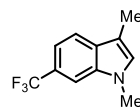

2-4

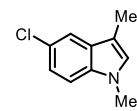

2-5

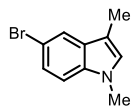

2-6

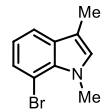

2-7

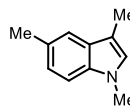

2-8

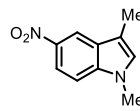

2-9

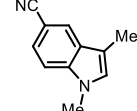

2-10

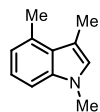

2-11

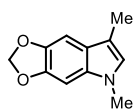

2-12

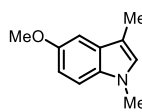

2-13

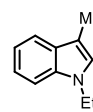

2-14

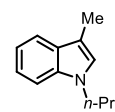

2-15

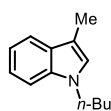

2-16

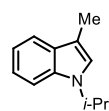

2-17

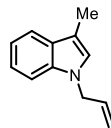

2-18

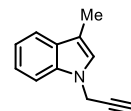

2-19

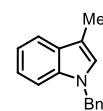

2-20

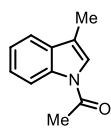

2-21

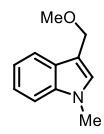

2-22

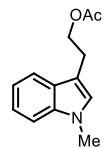

2-23

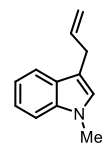

2-24

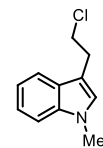

2-25

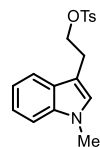

2-26

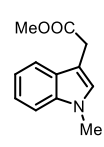

2-27

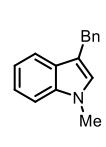

2-28

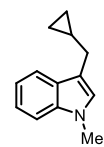

2-29

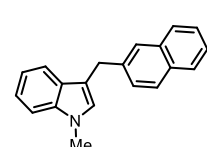

2-30

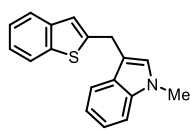

2-31

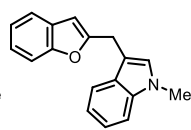

2-32

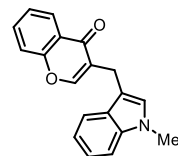

2-33

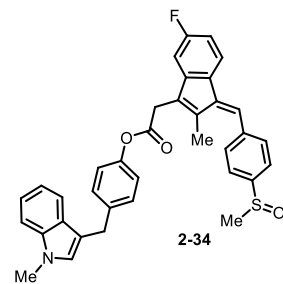

2-34

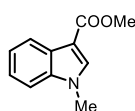

2-35

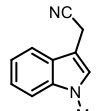

2-36

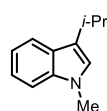

2-37

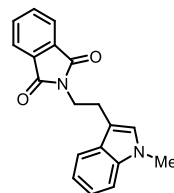

2-38

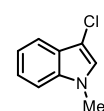

2-39

### 2.3 General procedure for the synthesis of products 3-5

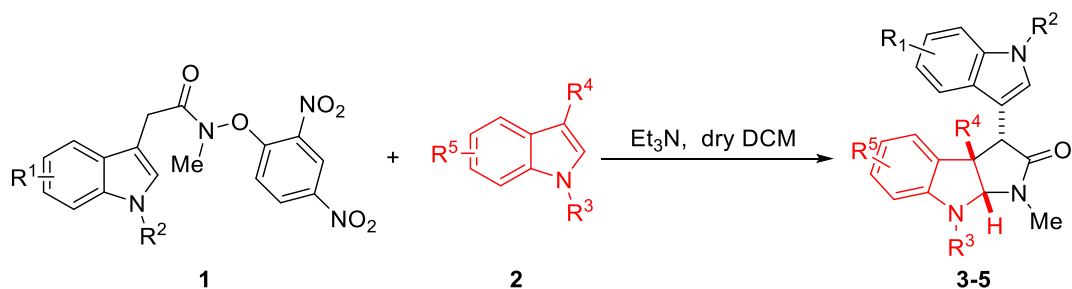

To a mixture of **1** (0.2 mmol, 1.0 equiv.) in dry DCM (2.0 mL) was added substituted indoles (0.3 mmol, 1.5 equiv.) and  $\text{Et}_3\text{N}$  (0.4 mmol, 2.0 equiv.). Then the mixture was stirred at room temperature for 12 h. After the reaction was completed, the reaction mixture was concentrated in vacuum. The residue was purified by flash column chromatography over silica gel using a mixture of petroleum ether and ethyl acetate as eluent to give the desired products **3-5**.

### 2.4 The experimental procedure for the synthesis of product 6a

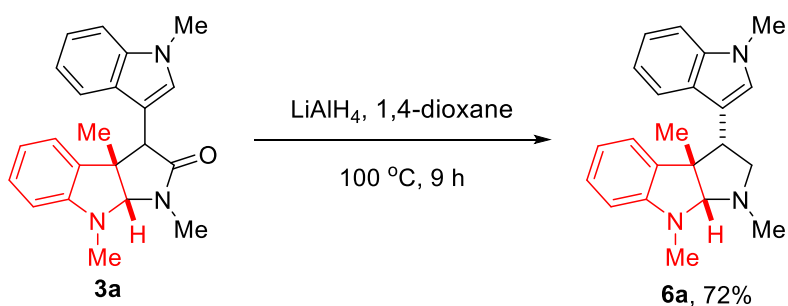

To a mixture of **3a** (0.4 mmol, 1.0 equiv.) in 1,4-dioxane (2.0 mL) at  $-78\text{ }^\circ\text{C}$  was added  $\text{LiAlH}_4$  (2.5 M in THF, 2.0 mmol, 5.0 equiv.). The reaction mixture is then placed in a heating mantle at  $100\text{ }^\circ\text{C}$  and stirred for 9 h under argon atmosphere.<sup>[2]</sup> Upon completion as monitored by TLC, the reaction mixture was cooled to  $0\text{ }^\circ\text{C}$  and carefully quenched with  $\text{NH}_4\text{Cl}$ . The mixture was filtered and the residue was washed with DCM. The filtrate was extracted with DCM for three times. The combined organic extracts were dried over  $\text{Na}_2\text{SO}_4$  and concentrated in vacuum. The residue was purified by flash



column chromatography over silica gel using a mixture of PE and EA as eluent to give the desired product **6a**.

### 3. Single crystal X-ray structure of compound **3a**

Sample preparation: The single crystal of compound **3a** was prepared by recrystallization from ethyl acetate and ethyl acetate (v/v = 1:10) by slowly evaporating the solvent.

Crystal measurement: The crystal was measured on a Bruker D8 Venture diffractometer. The crystal was kept at a steady  $T = 250.00$  K during data collection.

**Crystal Data.**  $C_{22}H_{23}N_3O$ ,  $M_r = 345.43$ , orthorhombic, *Pbca* (No. 61),  $a = 16.1014(9)$  Å,  $b = 10.1767(5)$  Å,  $c = 22.6414(12)$  Å,  $\alpha = \beta = \gamma = 90^\circ$ ,  $V = 3710.0(3)$  Å<sup>3</sup>,  $T = 250.00$  K,  $Z = 8$ ,  $Z' = 1$ ,  $m(\text{GaK}\alpha) = 0.387$ , 66491 reflections measured, 4300 unique ( $R_{\text{int}} = 0.0973$ ) which were used in all calculations. The final  $wR_2$  was 0.1615 (all data) and  $R_1$  was 0.0558 ( $I \geq 2 \sigma(I)$ ).

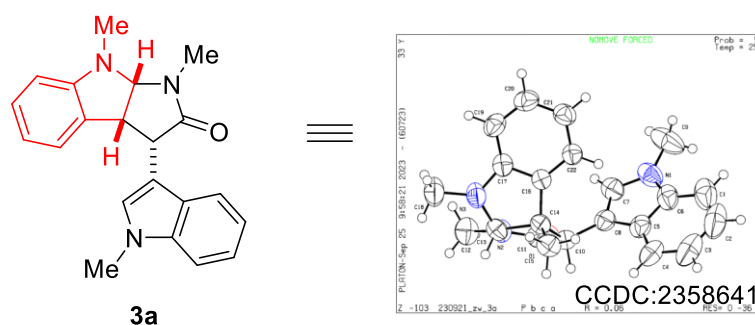

**Table 1 Crystal data and structure refinement for **3a**.**

|                     |                    |
|---------------------|--------------------|
| Identification code | <b>3a</b>          |
| Empirical formula   | $C_{22}H_{23}N_3O$ |
| Formula weight      | 345.43             |
| Temperature/K       | 250.00             |
| Crystal system      | orthorhombic       |
| Space group         | <i>Pbca</i>        |
| $a/\text{Å}$        | 16.1014(9)         |
| $b/\text{Å}$        | 10.1767(5)         |
| $c/\text{Å}$        | 22.6414(12)        |
| $\alpha/^\circ$     | 90                 |
| $\beta/^\circ$      | 90                 |
| $\gamma/^\circ$     | 90                 |

|                                             |                                                               |
|---------------------------------------------|---------------------------------------------------------------|
| Volume/Å <sup>3</sup>                       | 3710.0(3)                                                     |
| Z                                           | 8                                                             |
| ρ <sub>calc</sub> /cm <sup>3</sup>          | 1.237                                                         |
| μ/mm <sup>-1</sup>                          | 0.387                                                         |
| F(000)                                      | 1472.0                                                        |
| Crystal size/mm <sup>3</sup>                | 0.13 × 0.08 × 0.06                                            |
| Radiation                                   | GaKα (λ = 1.34139)                                            |
| 2θ range for data collection/°              | 6.792 to 122.048                                              |
| Index ranges                                | -20 ≤ h ≤ 21, -13 ≤ k ≤ 13, -29 ≤ l ≤ 28                      |
| Reflections collected                       | 66491                                                         |
| Independent reflections                     | 4300 [R <sub>int</sub> = 0.0973, R <sub>sigma</sub> = 0.0529] |
| Data/restraints/parameters                  | 4300/0/239                                                    |
| Goodness-of-fit on F <sup>2</sup>           | 1.063                                                         |
| Final R indexes [I ≥ 2σ (I)]                | R <sub>1</sub> = 0.0558, wR <sub>2</sub> = 0.1390             |
| Final R indexes [all data]                  | R <sub>1</sub> = 0.0927, wR <sub>2</sub> = 0.1615             |
| Largest diff. peak/hole / e Å <sup>-3</sup> | 0.19/-0.25                                                    |

#### 4. Characterization data of products

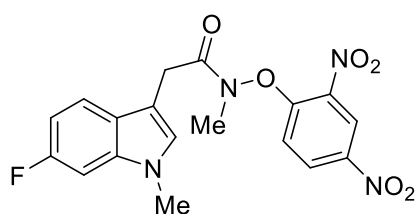

***N*-(2,4-dinitrophenoxy)-2-(6-fluoro-1-methyl-1*H*-indol-3-yl)-*N*-methylacetamide (1c):** Yellow solid (362 mg, 62% yield); R<sub>f</sub> = 0.33 (PE:EA = 2:1); <sup>1</sup>H NMR (500 MHz, CDCl<sub>3</sub>) δ 8.70 (d, *J* = 2.7 Hz, 1H), 8.02 (dd, *J* = 9.3, 2.7 Hz, 1H), 7.37 (dd, *J* = 8.7, 5.2 Hz, 1H), 6.98 (d, *J* = 9.3 Hz, 1H), 6.82 – 6.75 (m, 3H), 3.93 (s, 2H), 3.49 (s, 3H), 3.35 (s, 3H). <sup>13</sup>C NMR (126 MHz, CDCl<sub>3</sub>) δ 175.8, 160.1 (d, *J* = 239.1 Hz), 156.1, 141.8, 136.7 (d, *J* = 12.0 Hz), 136.3, 128.7, 128.2 (d, *J* = 3.6 Hz), 123.9, 121.7, 119.7 (d, *J* = 10.1 Hz), 114.6, 108.4 (d, *J* = 24.8 Hz), 106.1, 95.6 (d, *J* = 26.4 Hz), 36.4, 32.7, 31.4. <sup>19</sup>F NMR (471 MHz, CDCl<sub>3</sub>) δ -119.91. HRMS (ESI): calcd for C<sub>18</sub>H<sub>15</sub>FN<sub>4</sub>O<sub>6</sub>Na [M + Na]<sup>+</sup>: 425.0873, Found: 425.0872.

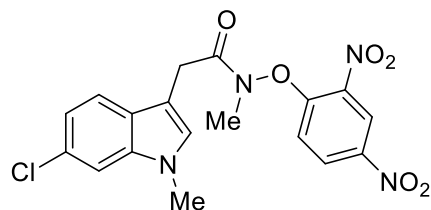

**2-(6-chloro-1-methyl-1*H*-indol-3-yl)-*N*-(2,4-dinitrophenoxy)-*N*-methylacetamide (1d):** Yellow solid (353 mg, 65% yield); R<sub>f</sub> = 0.33 (PE:EA = 2:1); <sup>1</sup>H NMR (500 MHz, CDCl<sub>3</sub>) δ 8.71 (d, *J* = 2.7 Hz, 1H), 8.04 (dd, *J* = 9.2, 2.7 Hz, 1H), 7.35 (d, *J* = 8.5 Hz, 1H), 7.09 (d, *J* = 1.8 Hz, 1H), 7.01 – 6.98 (m, 2H), 6.79 (s, 1H), 3.92 (s, 2H), 3.52 (s, 3H), 3.35 (s, 3H). <sup>13</sup>C NMR (126 MHz, CDCl<sub>3</sub>) δ 175.7, 156.0, 141.9, 137.0, 136.4, 128.8, 128.6, 128.3, 125.9, 121.8, 120.3, 119.8, 114.6, 109.3, 106.2, 36.4, 32.7, 31.2. HRMS (ESI): calcd for C<sub>18</sub>H<sub>15</sub>ClN<sub>4</sub>O<sub>6</sub>Na [M + Na]<sup>+</sup>: 441.0578, Found: 441.0581.

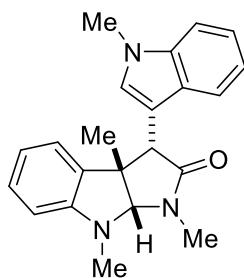

**1,3a,8-trimethyl-3-(1-methyl-1H-indol-3-yl)-3,3a,8,8a-tetrahydropyrrolo[2,3-b]indol-2(1H)-one (3a):** white solid (49 mg, 64% yield);  $R_f = 0.36$  (PE:EA = 1:2);  $^1\text{H NMR}$  (500 MHz,  $\text{CDCl}_3$ )  $\delta$  7.49 (d,  $J = 7.9$  Hz, 1H), 7.29 (d,  $J = 8.2$  Hz, 1H), 7.20 (t,  $J = 7.6$  Hz, 1H), 7.07 (t,  $J = 7.5$  Hz, 1H), 6.98 (t,  $J = 7.6$  Hz, 1H), 6.67 (s, 1H), 6.42 (d,  $J = 7.8$  Hz, 1H), 6.25 (t,  $J = 7.5$  Hz, 1H), 5.72 (d,  $J = 7.4$  Hz, 1H), 4.73 (s, 1H), 4.27 (s, 1H), 3.69 (s, 3H), 3.16 (s, 3H), 3.07 (s, 3H), 1.64 (s, 3H).  $^{13}\text{C NMR}$  (126 MHz,  $\text{CDCl}_3$ )  $\delta$  174.0, 149.6, 136.8, 132.3, 129.2, 128.7, 128.3, 126.0, 121.4, 119.1, 119.1, 117.8, 109.5, 109.4, 107.2, 90.2, 52.5, 50.2, 36.1, 32.9, 28.9, 28.6. HRMS (ESI): calcd for  $\text{C}_{22}\text{H}_{23}\text{N}_3\text{ONa}$  [ $\text{M} + \text{Na}$ ] $^+$ : 368.1739, Found: 368.1740.

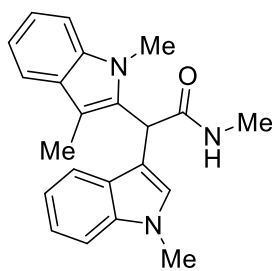

**2-(1,3-dimethyl-1H-indol-2-yl)-N-methyl-2-(1-methyl-1H-indol-3-yl)acetamide (3a')**: white solid (13 mg, 17% yield);  $R_f = 0.67$  (PE:EA = 1:2);  $^1\text{H NMR}$  (500 MHz,  $\text{CDCl}_3$ )  $\delta$  7.59 (d,  $J = 7.9$  Hz, 1H), 7.37 (d,  $J = 8.0$  Hz, 1H), 7.32 (d,  $J = 8.2$  Hz, 1H), 7.27 – 7.26 (m, 1H), 7.25 – 7.24 (m, 1H), 7.24 – 7.20 (m, 1H), 7.15 – 7.12 (m, 1H), 7.10 – 7.07 (m, 1H), 6.87 (s, 1H), 5.96 (s, 1H), 5.47 (s, 1H), 3.72 (s, 3H), 3.54 (s, 3H), 2.83 (d,  $J = 4.8$  Hz, 3H), 2.30 (s, 3H).  $^{13}\text{C NMR}$  (126 MHz,  $\text{CDCl}_3$ )  $\delta$  171.5, 137.4, 137.0, 133.5, 129.0, 128.5, 127.2, 122.2, 121.6, 119.8, 119.1, 119.0, 118.7, 110.1, 109.6, 109.1, 108.4, 42.0, 33.0, 30.3, 26.8, 9.1. HRMS (ESI): calcd for  $\text{C}_{22}\text{H}_{23}\text{N}_3\text{ONa}$  [ $\text{M} + \text{Na}$ ] $^+$ : 368.1739, Found: 368.1743.

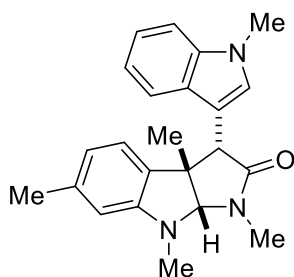

**1,3a,6,8-tetramethyl-3-(1-methyl-1H-indol-3-yl)-3,3a,8,8a-tetrahydropyrrolo[2,3-b]indol-2(1H)-one (3b):** white solid (38 mg, 52% yield);  $R_f = 0.50$  (PE:EA = 1:2);  $^1\text{H NMR}$  (500 MHz,  $\text{CDCl}_3$ )  $\delta$  7.53 (d,  $J = 7.9$  Hz, 1H), 7.31 (d,  $J = 8.2$  Hz, 1H), 7.21 (t,  $J = 7.6$  Hz, 1H), 7.09 (t,  $J = 7.4$  Hz, 1H), 6.67 (s, 1H), 6.26 (s, 1H), 6.08 (d,  $J = 8.3$  Hz, 1H), 5.57 (d,  $J = 7.6$  Hz, 1H), 4.72 (s, 1H), 4.27 (s, 1H), 3.71 (s, 3H), 3.15 (s, 3H), 3.05 (s, 3H), 2.20 (s, 3H), 1.62 (s, 3H).  $^{13}\text{C NMR}$  (126 MHz,  $\text{CDCl}_3$ )  $\delta$  173.9, 149.6, 138.2, 136.7, 129.5, 129.3, 128.8, 125.8, 121.3, 119.1, 119.1, 119.1, 118.5, 109.4, 108.1, 90.1, 52.4, 50.0, 35.9, 32.9, 28.7, 28.6, 21.7. HRMS (ESI): calcd for  $\text{C}_{23}\text{H}_{25}\text{N}_3\text{ONa}$  [ $\text{M} + \text{Na}$ ] $^+$ : 382.1895, Found: 382.1899.

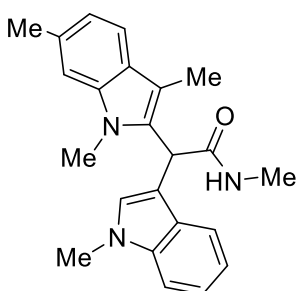

**N-methyl-2-(1-methyl-1H-indol-3-yl)-2-(1,3,6-trimethyl-1H-indol-2-yl)acetamide (3b')**: white solid (12 mg, 17% yield);  $R_f = 0.64$  (PE:EA = 1:2);  $^1\text{H NMR}$  (500 MHz,  $\text{CDCl}_3$ )  $\delta$  7.49 (d,  $J = 8.1$  Hz, 1H), 7.37 (d,  $J = 8.0$  Hz, 1H), 7.33 (d,  $J = 8.2$  Hz, 1H), 7.28 – 7.24 (m, 1H), 7.11 – 7.09 (m, 1H), 7.07 (s, 1H), 6.99 (dd,  $J = 8.2, 1.4$  Hz, 1H), 6.90 (d,  $J = 1.1$  Hz, 1H), 5.98 (d,  $J = 5.1$  Hz, 1H), 5.47 (s, 1H), 3.73 (s, 3H), 3.52 (s, 3H), 2.84 (d,  $J = 4.8$  Hz, 3H), 2.52 (s, 3H), 2.30 (s, 3H).  $^{13}\text{C NMR}$  (126 MHz,  $\text{CDCl}_3$ )  $\delta$  171.5, 137.4, 137.3, 132.7, 131.5, 128.9, 127.2, 126.4, 122.1, 120.7, 119.7, 119.2, 118.4, 110.2, 109.5, 109.1, 108.3, 42.0, 32.9, 30.2, 26.7, 22.0, 9.1. HRMS (ESI): calcd for  $\text{C}_{23}\text{H}_{25}\text{N}_3\text{ONa}$  [ $\text{M} + \text{Na}$ ] $^+$ : 382.1895, Found: 382.1900.

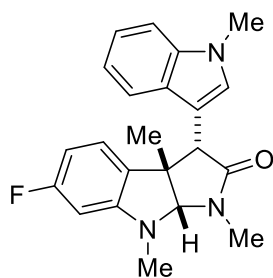

**6-fluoro-1,3a,8-trimethyl-3-(1-methyl-1H-indol-3-yl)-3,3a,8,8a-tetrahydropyrrolo[2,3-b]indol-2(1H)-one (3c):** white solid (46 mg, 64% yield);  $R_f = 0.32$  (PE:EA = 1:2);  $^1\text{H NMR}$  (500 MHz,  $\text{CDCl}_3$ )  $\delta$  7.46 (d,  $J = 8.0$  Hz, 1H), 7.29 (d,  $J = 8.3$  Hz, 1H), 7.20 (t,  $J = 7.4$  Hz, 1H), 7.06 (t,  $J = 7.4$  Hz, 1H), 6.67 (s, 1H), 6.09 (dd,  $J = 10.0, 2.3$  Hz, 1H), 5.91 – 5.87 (m, 1H), 5.60 – 5.57 (m, 1H), 4.76 (s, 1H), 4.23 (s, 1H), 3.71 (s, 3H), 3.13 (s, 3H), 3.07 (s, 3H), 1.61 (s, 3H).  $^{13}\text{C NMR}$  (126 MHz,  $\text{CDCl}_3$ )  $\delta$  174.0, 164.0 (d,  $J = 242.6$  Hz), 151.0 (d,  $J = 11.4$  Hz), 136.8, 129.2, 128.6, 127.6 (d,  $J = 2.7$  Hz), 126.6 (d,  $J = 10.2$  Hz), 121.5, 119.2, 119.0, 109.5, 109.3, 103.6 (d,  $J = 22.8$  Hz), 94.8 (d,  $J = 26.7$  Hz), 90.4, 51.9, 50.2, 35.5, 32.9, 29.0, 28.5.  $^{19}\text{F NMR}$  (471 MHz,  $\text{CDCl}_3$ )  $\delta$  -114.43. HRMS (ESI): calcd for  $\text{C}_{22}\text{H}_{22}\text{FN}_3\text{ONa}$   $[\text{M} + \text{Na}]^+$ : 386.1645, Found: 386.1649.

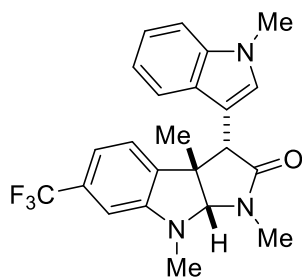

**1,3a,8-trimethyl-3-(1-methyl-1H-indol-3-yl)-6-(trifluoromethyl)-3,3a,8,8a-tetrahydropyrrolo[2,3-b]indol-2(1H)-one (3d):** white solid (26 mg, 31% yield);  $R_f = 0.43$  (PE:EA = 1:2);  $^1\text{H NMR}$  (500 MHz,  $\text{CDCl}_3$ )  $\delta$  7.47 (d,  $J = 8.0$  Hz, 1H), 7.31 (d,  $J = 8.2$  Hz, 1H), 7.22 (t,  $J = 7.1$  Hz, 1H), 7.08 (t,  $J = 7.4$  Hz, 1H), 6.67 (s, 1H), 6.57 (s, 1H), 6.48 (d,  $J = 7.8$  Hz, 1H), 5.74 (d,  $J = 7.7$  Hz, 1H), 4.81 (s, 1H), 4.29 (s, 1H), 3.71 (s, 3H), 3.19 (s, 3H), 3.08 (s, 3H), 1.64 (s, 3H).  $^{13}\text{C NMR}$  (126 MHz,  $\text{CDCl}_3$ )  $\delta$  173.7, 149.6, 136.8, 136.1, 130.7 (q,  $J = 31.3$  Hz), 129.2, 128.5, 126.0, 124.5 (q,  $J = 272.1$  Hz), 121.6, 119.3, 118.9, 114.6 (q,  $J = 4.5$  Hz), 109.5, 109.0, 103.0 (q,  $J = 4.0$  Hz), 89.7, 52.4, 49.9, 35.3, 32.9, 29.0, 28.1.  $^{19}\text{F NMR}$  (471 MHz,  $\text{CDCl}_3$ )  $\delta$  -62.34. HRMS (ESI): calcd for  $\text{C}_{23}\text{H}_{22}\text{F}_3\text{N}_3\text{ONa}$   $[\text{M} + \text{Na}]^+$ : 436.1613, Found: 436.1618.

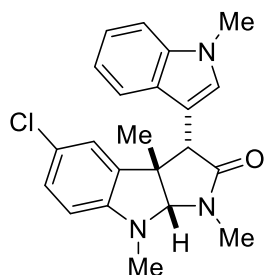

**5-chloro-1,3a,8-trimethyl-3-(1-methyl-1H-indol-3-yl)-3,3a,8,8a-tetrahydropyrrolo[2,3-b]indol-2(1H)-one (3e):** white solid (54 mg, 76% yield);  $R_f = 0.38$  (PE:EA = 1:2);  $^1\text{H NMR}$  (500 MHz,  $\text{CDCl}_3$ )  $\delta$  7.45 (d,  $J = 8.0$  Hz, 1H), 7.32 (s, 1H), 7.21 (t,  $J = 7.4$  Hz, 1H), 7.07 (t,  $J = 7.1$  Hz, 1H), 6.92 (d,  $J = 7.8$  Hz, 1H), 6.67 (s, 1H), 6.30 (d,  $J = 8.3$  Hz, 1H), 5.55 (s, 1H), 4.75 (s, 1H), 4.25 (s, 1H), 3.73 (s, 3H), 3.13 (s, 3H), 3.05 (s, 3H), 1.60 (s, 3H).  $^{13}\text{C NMR}$  (126 MHz,  $\text{CDCl}_3$ )  $\delta$  173.8, 148.0, 136.8, 134.0, 129.2, 128.5, 128.0, 126.3, 122.4, 121.6, 119.3, 118.9, 109.6, 109.0, 107.8, 90.0, 52.6, 50.0, 35.8, 32.9, 28.9, 27.9. HRMS (ESI): calcd for  $\text{C}_{22}\text{H}_{22}\text{ClN}_3\text{ONa}$   $[\text{M} + \text{Na}]^+$ : 402.1349, Found: 402.1345.

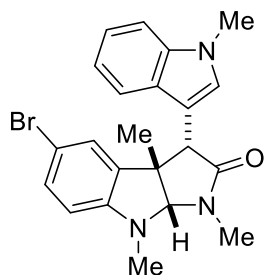

**5-bromo-1,3a,8-trimethyl-3-(1-methyl-1H-indol-3-yl)-3,3a,8,8a-tetrahydropyrrolo[2,3-b]indol-2(1H)-one (3f):** white solid (63 mg, 75% yield);  $R_f = 0.41$  (PE:EA = 1:2);  $^1\text{H NMR}$  (500 MHz,  $\text{CDCl}_3$ )  $\delta$  7.45 (d,  $J = 8.0$  Hz, 1H), 7.33 (d,  $J = 8.2$  Hz, 1H), 7.22 (t,  $J = 7.3$  Hz, 1H), 7.09 – 7.05 (m, 2H), 6.65 (s, 1H), 6.26 (d,  $J = 8.3$  Hz, 1H), 5.64 (d,  $J = 2.0$  Hz, 1H), 4.75 (s, 1H), 4.26 (s, 1H), 3.74 (s, 3H), 3.13 (s, 3H), 3.05 (s, 3H), 1.59 (s, 3H).  $^{13}\text{C NMR}$  (126 MHz,  $\text{CDCl}_3$ )  $\delta$  173.8, 148.4, 136.8, 134.4, 130.9, 129.3, 129.2, 128.5, 121.7, 119.3, 118.9, 109.6, 109.3, 109.0, 108.4, 89.8, 52.7, 49.9, 35.6, 32.9, 29.0, 27.8. HRMS (ESI): calcd for  $\text{C}_{22}\text{H}_{22}\text{BrN}_3\text{ONa}$   $[\text{M} + \text{Na}]^+$ : 446.0844, Found: 446.0845.

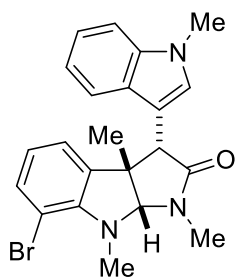

**7-bromo-1,3a,8-trimethyl-3-(1-methyl-1H-indol-3-yl)-3,3a,8,8a-tetrahydropyrrolo[2,3-b]indol-2(1H)-one (3g):** white solid (39 mg, 47% yield);  $R_f = 0.47$  (PE:EA = 1:2);  $^1\text{H NMR}$  (500 MHz,  $\text{CDCl}_3$ )  $\delta$  7.44 (d,  $J = 7.4$  Hz, 1H), 7.31 (d,  $J = 8.2$  Hz, 1H), 7.21 (t,  $J = 6.9$  Hz, 1H), 7.15 (dd,  $J = 8.0, 1.2$  Hz, 1H), 7.07 (t,  $J = 7.4$  Hz, 1H), 6.62 (s, 1H), 6.24 (t,  $J = 7.7$  Hz, 1H), 5.60 (dd,  $J = 7.5, 1.2$  Hz, 1H), 4.64 (s, 1H), 4.29 (s, 1H), 3.71 (s, 3H), 3.31 (s, 3H), 3.03 (s, 3H), 1.69 (s, 3H).  $^{13}\text{C NMR}$  (126 MHz,  $\text{CDCl}_3$ )  $\delta$  172.9, 148.5, 137.6, 136.8, 132.9, 129.6, 128.6, 125.4, 121.8, 121.5, 119.3, 119.1, 109.5, 108.8, 106.8, 92.1, 53.6, 50.2, 41.1, 33.0, 29.1, 27.5. HRMS (ESI): calcd for  $\text{C}_{22}\text{H}_{22}\text{BrN}_3\text{ONa}$   $[\text{M} + \text{Na}]^+$ : 446.0844, Found: 446.0849.

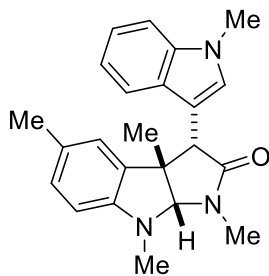

**1,3a,5,8-tetramethyl-3-(1-methyl-1H-indol-3-yl)-3,3a,8,8a-tetrahydropyrrolo[2,3-b]indol-2(1H)-one (3h):** white solid (42 mg, 57% yield);  $R_f = 0.44$  (PE:EA = 1:2);  $^1\text{H NMR}$  (500 MHz,  $\text{CDCl}_3$ )  $\delta$  7.47 (d,  $J = 7.9$  Hz, 1H), 7.30 (d,  $J = 8.2$  Hz, 1H), 7.20 (t,  $J = 7.6$  Hz, 1H), 7.07 (t,  $J = 7.5$  Hz, 1H), 6.78 (d,  $J = 6.2$  Hz, 1H), 6.65 (s, 1H), 6.34 (d,  $J = 7.9$  Hz, 1H), 5.49 (s, 1H), 4.70 (s, 1H), 4.25 (s, 1H), 3.70 (s, 3H), 3.12 (s, 3H), 3.06 (s, 3H), 1.80 (s, 3H), 1.61 (s, 3H).  $^{13}\text{C NMR}$  (126 MHz,  $\text{CDCl}_3$ )  $\delta$  174.0, 147.5, 136.8, 132.6, 129.2, 128.8, 128.5, 127.0, 126.9, 121.4, 119.1, 119.1, 109.6, 109.3, 107.4, 90.6, 52.7, 50.2, 36.7, 32.8, 28.8, 28.4, 20.5. HRMS (ESI): calcd for  $\text{C}_{23}\text{H}_{25}\text{N}_3\text{ONa}$   $[\text{M} + \text{Na}]^+$ : 382.1895, Found: 382.1899.

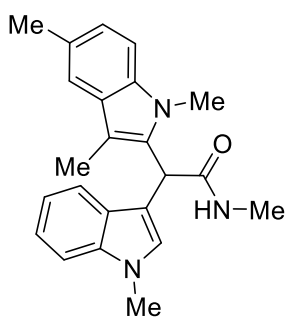

**N-methyl-2-(1-methyl-1H-indol-3-yl)-2-(1,3,5-trimethyl-1H-indol-2-yl)acetamide (3h'):** white solid (12 mg, 17% yield);  $R_f = 0.55$  (PE:EA = 1:2);  $^1\text{H NMR}$  (500 MHz,  $\text{CDCl}_3$ )  $\delta$  7.38 (s, 1H), 7.34 (d,  $J = 8.0$  Hz, 1H), 7.31 (d,  $J = 8.2$  Hz, 1H), 7.24 (t,  $J = 7.5$  Hz, 1H), 7.14 (d,  $J = 8.3$  Hz, 1H), 7.08 – 7.04 (m, 2H), 6.89 (s, 1H), 5.93 (d,  $J = 5.0$  Hz, 1H), 5.45 (s, 1H), 3.72 (s, 3H), 3.51 (s, 3H), 2.82 (d,  $J = 4.8$  Hz, 3H), 2.49 (s, 3H), 2.27 (s, 3H).  $^{13}\text{C NMR}$  (126 MHz,  $\text{CDCl}_3$ )  $\delta$  171.5, 137.4, 135.5, 133.5, 128.9, 128.7, 128.3, 127.3, 123.2, 122.2, 119.8, 119.2, 118.4, 110.2, 109.6, 108.8, 108.0, 42.0, 33.0, 30.3, 26.8, 21.6, 9.1. HRMS (ESI): calcd for  $\text{C}_{23}\text{H}_{25}\text{N}_3\text{ONa}$   $[\text{M} + \text{Na}]^+$ : 382.1895, Found: 382.1898.

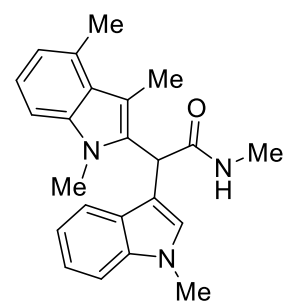

**N-methyl-2-(1-methyl-1H-indol-3-yl)-2-(1,3,4-trimethyl-1H-indol-2-yl)acetamide (3i'):** white solid (45 mg, 63% yield);  $R_f = 0.52$  (PE:EA = 1:2);  $^1\text{H NMR}$  (500 MHz,  $\text{CDCl}_3$ )  $\delta$  7.35 (d,  $J = 7.8$  Hz, 1H), 7.33 (d,  $J = 8.3$  Hz, 1H), 7.26 (t,  $J = 4.0$  Hz, 1H), 7.10 – 7.07 (m, 3H), 6.97 (s, 1H), 6.86 – 6.84 (m, 1H), 5.95 (d,  $J = 5.0$  Hz, 1H), 5.50 (s, 1H), 3.74 (s, 3H), 3.53 (s, 3H), 2.84 (d,  $J = 4.8$  Hz, 3H), 2.78 (s, 3H), 2.55 (s, 3H).  $^{13}\text{C NMR}$  (126 MHz,  $\text{CDCl}_3$ )  $\delta$  171.6, 137.4, 137.3, 133.4, 131.3, 129.0, 127.3, 126.8, 122.1, 121.6, 120.9, 119.8, 119.2, 110.0, 109.6, 109.5, 107.2, 41.4, 33.0, 30.5, 26.8, 20.8, 12.1. HRMS (ESI): calcd for  $\text{C}_{23}\text{H}_{25}\text{N}_3\text{ONa}$   $[\text{M} + \text{Na}]^+$ : 382.1895, Found: 382.1901.

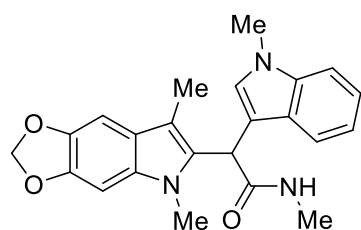

**2-(5,7-dimethyl-5H-[1,3]dioxolo[4,5-f]indol-6-yl)-N-methyl-2-(1-methyl-1H-indol-3-yl)acetamide (3j')**: white solid (64 mg, 81% yield);  $R_f = 0.52$  (PE:EA = 1:2);  $^1\text{H NMR}$  (500 MHz,  $\text{CDCl}_3$ )  $\delta$  7.35 (d,  $J = 8.0$  Hz, 1H), 7.33 (d,  $J = 8.2$  Hz, 1H), 7.25 (t,  $J = 7.0$  Hz, 1H), 7.09 (t,  $J = 7.4$  Hz, 1H), 6.97 (s, 1H), 6.90 (s, 1H), 6.72 (s, 1H), 6.03 (d,  $J = 5.0$  Hz, 1H), 5.92 (q,  $J = 1.4$  Hz,

2H), 5.42 (s, 1H), 3.73 (s, 3H), 3.46 (s, 3H), 2.83 (d,  $J = 4.9$  Hz, 3H), 2.24 (s, 3H).  $^{13}\text{C NMR}$  (126 MHz,  $\text{CDCl}_3$ )  $\delta$  171.6, 144.7, 142.4, 137.3, 132.1, 131.9, 128.8, 127.1, 122.2, 122.1, 119.7, 119.0, 110.3, 109.5, 108.4, 100.5, 97.4, 90.3, 42.0, 32.9, 30.5, 26.7, 9.2. HRMS (ESI): calcd for  $\text{C}_{23}\text{H}_{23}\text{N}_3\text{O}_3\text{Na}$   $[\text{M} + \text{Na}]^+$ : 412.1637, Found: 412.1641.

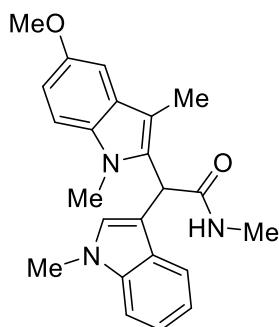

**2-(5-methoxy-1,3-dimethyl-1H-indol-2-yl)-N-methyl-2-(1-methyl-1H-indol-3-yl)acetamide (3k')**: white solid (59 mg, 79% yield);  $R_f = 0.54$  (PE:EA = 1:2);  $^1\text{H NMR}$  (500 MHz,  $\text{CDCl}_3$ )  $\delta$  7.46 (d,  $J = 8.6$  Hz, 1H), 7.34 (d,  $J = 8.0$  Hz, 1H), 7.32 (d,  $J = 8.2$  Hz, 1H), 7.24 (t,  $J = 8.2$  Hz, 1H), 7.07 (t,  $J = 7.5$  Hz, 1H), 6.91 (s, 1H), 6.81 (dd,  $J = 8.5,$

2.2 Hz, 1H), 6.72 (d,  $J = 2.2$  Hz, 1H), 5.96 (d,  $J = 4.9$  Hz, 1H), 5.43 (s, 1H), 3.88 (s, 3H), 3.73 (s, 3H), 3.49 (s, 3H), 2.83 (d,  $J = 4.8$  Hz, 3H), 2.27 (s, 3H).  $^{13}\text{C NMR}$  (126 MHz,  $\text{CDCl}_3$ )  $\delta$  171.6, 156.5, 137.7, 137.4, 132.1, 128.9, 127.3, 123.0, 122.2, 119.8, 119.4, 119.2, 110.3, 109.6, 108.7, 108.4,

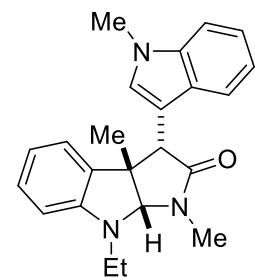

**8-ethyl-1,3a-dimethyl-3-(1-methyl-1H-indol-3-yl)-3,3a,8,8a-tetrahydropyrrolo[2,3-b]indol-2(1H)-one (3l)**: white solid (47 mg, 64% yield)  $R_f = 0.48$  (PE:EA = 1:2);  $^1\text{H NMR}$  (500 MHz,  $\text{CDCl}_3$ )  $\delta$  7.49 (d,  $J = 7.9$  Hz, 1H), 7.30 (d,  $J = 8.1$  Hz, 1H), 7.21 (t,  $J = 8.2$  Hz, 1H), 7.07 (t,  $J = 7.5$  Hz, 1H), 6.97 (td,  $J = 7.6, 1.3$  Hz, 1H), 6.68 (s, 1H), 6.50 (d,  $J = 7.8$  Hz, 1H), 6.25 (t,  $J = 7.4$  Hz, 1H), 5.67 (d,  $J = 7.2$  Hz, 1H), 4.79 (s, 1H), 4.29 (s, 1H), 3.71 (s,

3H), 3.67 – 3.60 (m, 1H), 3.45 – 3.38 (m, 1H), 3.03 (s, 3H), 1.61 (s, 3H), 1.23 (t,  $J = 7.1$  Hz, 3H).  $^{13}\text{C NMR}$  (126 MHz,  $\text{CDCl}_3$ )  $\delta$  173.6, 148.6, 136.8, 133.3, 129.4, 128.8, 128.2, 126.3, 121.4, 119.1, 119.1, 118.0, 109.4, 109.4, 108.6, 87.7, 52.9, 50.0, 43.7, 32.9, 28.6, 28.0, 13.4. HRMS (ESI): calcd for  $\text{C}_{23}\text{H}_{25}\text{N}_3\text{O}_2\text{Na}$   $[\text{M} + \text{Na}]^+$ : 382.1895, Found: 382.1899.

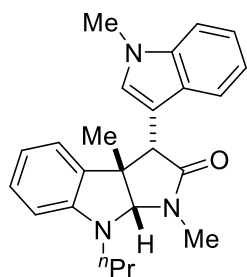

**1,3a-dimethyl-3-(1-methyl-1H-indol-3-yl)-8-propyl-3,3a,8,8a-tetrahydropyrrolo[2,3-b]indol-2(1H)-one (3m)**: white solid (45 mg, 61% yield),  $R_f = 0.61$  (PE:EA = 1:2);  $^1\text{H NMR}$  (500 MHz,  $\text{CDCl}_3$ )  $\delta$  7.50 (d,  $J = 8.0$  Hz, 1H), 7.31 (d,  $J = 8.2$  Hz, 1H), 7.21 (t,  $J = 7.6$  Hz, 1H), 7.07 (t,  $J = 7.5$  Hz, 1H), 6.96 (t,  $J = 7.7$  Hz, 1H), 6.69 (s, 1H), 6.47 (d,  $J = 7.9$  Hz, 1H), 6.24 (t,  $J = 7.4$  Hz, 1H), 5.66 (d,  $J = 7.5$  Hz, 1H), 4.81 (s, 1H), 4.29 (s, 1H), 3.71 (s,

3H), 3.56 – 3.51 (m, 1H), 3.31 – 3.25 (m, 1H), 3.02 (s, 3H), 1.72 – 1.65 (m, 2H), 1.62 (s, 3H), 0.98 (t,  $J = 7.4$  Hz, 3H).  $^{13}\text{C NMR}$  (126 MHz,  $\text{CDCl}_3$ )  $\delta$  173.6, 148.8, 136.8, 132.9, 129.5, 128.8, 128.2, 126.3, 121.4, 119.2, 119.1, 117.7, 109.4, 109.3, 108.2, 88.1, 53.0, 51.1, 50.0, 32.9, 28.3, 28.1, 21.7, 11.6. HRMS (ESI): calcd for  $\text{C}_{24}\text{H}_{27}\text{N}_3\text{O}_2\text{Na}$   $[\text{M} + \text{Na}]^+$ : 396.2052, Found: 396.2054.

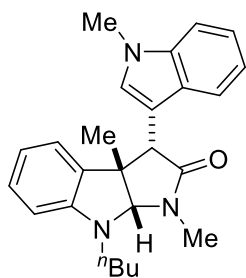

**8-butyl-1,3a-dimethyl-3-(1-methyl-1H-indol-3-yl)-3,3a,8,8a-tetrahydropyrrolo[2,3-b]indol-2(1H)-one (3n):** white solid (44 mg, 57% yield);  $R_f=0.65$  (PE:EA = 1:2);  $^1\text{H NMR}$  (500 MHz,  $\text{CDCl}_3$ )  $\delta$  7.51 (d,  $J = 7.9$  Hz, 1H), 7.32 (d,  $J = 8.2$  Hz, 1H), 7.22 (t,  $J = 7.6$  Hz, 1H), 7.08 (t,  $J = 7.6$  Hz, 1H), 6.97 (td,  $J = 7.6, 1.4$  Hz, 1H), 6.70 (s, 1H), 6.48 (d,  $J = 7.8$  Hz, 1H), 6.25 (t,  $J = 7.8$  Hz, 1H), 5.67 (d,  $J = 7.2$  Hz, 1H), 4.81 (s, 1H), 4.30 (s, 1H), 3.72 (s, 3H), 3.58 – 3.54 (m, 1H), 3.36 – 3.31 (m, 1H), 3.03 (s, 3H), 1.67 – 1.63 (m, 2H), 1.62 (s, 3H), 1.44 – 1.38 (m, 2H), 0.98 (t,  $J = 7.4$  Hz, 3H).  $^{13}\text{C NMR}$  (126 MHz,  $\text{CDCl}_3$ )  $\delta$  173.6, 148.7, 136.8, 132.9, 129.4, 128.8, 128.2, 126.3, 121.4, 119.1, 119.1, 117.7, 109.4, 109.3, 108.1, 88.0, 52.9, 49.9, 49.0, 32.9, 30.5, 28.3, 28.1, 20.3, 14.0. HRMS (ESI): calcd for  $\text{C}_{25}\text{H}_{29}\text{N}_3\text{ONa}$   $[\text{M} + \text{Na}]^+$ : 410.2208, Found: 410.2210.

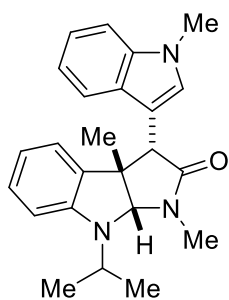

**8-isopropyl-1,3a-dimethyl-3-(1-methyl-1H-indol-3-yl)-3,3a,8,8a-tetrahydropyrrolo[2,3-b]indol-2(1H)-one (3o):** white solid (42 mg, 58% yield);  $R_f=0.50$  (PE:EA = 1:2);  $^1\text{H NMR}$  (500 MHz,  $\text{CDCl}_3$ )  $\delta$  7.49 – 7.48 (m, 1H), 7.33 (d,  $J = 8.2$  Hz, 1H), 7.22 (t,  $J = 7.5$  Hz, 1H), 7.07 (t,  $J = 7.5$  Hz, 1H), 6.98 (td,  $J = 7.6, 1.3$  Hz, 1H), 6.69 – 6.66 (m, 2H), 6.30 (t,  $J = 7.5$  Hz, 1H), 5.60 (d,  $J = 7.5$  Hz, 1H), 4.86 (s, 1H), 4.32 (s, 1H), 3.89 – 3.82 (m, 1H), 3.73 (s, 3H), 3.02 (s, 3H), 1.59 (s, 3H), 1.43 (d,  $J = 6.9$  Hz, 3H), 1.25 (d,  $J = 6.7$  Hz, 3H).  $^{13}\text{C NMR}$  (126 MHz,  $\text{CDCl}_3$ )  $\delta$  173.3, 149.0, 136.8, 134.6, 129.7, 128.9, 128.1, 126.6, 121.4, 119.2, 119.1, 118.9, 111.6, 109.4, 109.1, 84.8, 53.3, 51.3, 49.8, 32.9, 28.2, 27.6, 21.8, 21.5. HRMS (ESI): calcd for  $\text{C}_{24}\text{H}_{27}\text{N}_3\text{ONa}$   $[\text{M} + \text{Na}]^+$ : 396.2052, Found: 396.2056.

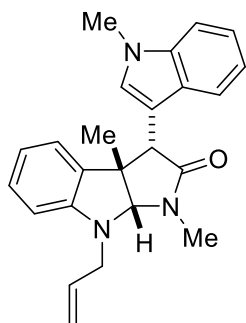

**8-allyl-1,3a-dimethyl-3-(1-methyl-1H-indol-3-yl)-3,3a,8,8a-tetrahydropyrrolo[2,3-b]indol-2(1H)-one (3p):** white solid (42 mg, 57% yield);  $R_f = 0.53$  (PE:EA = 1:2);  $^1\text{H NMR}$  (500 MHz,  $\text{CDCl}_3$ )  $\delta$  7.48 (d,  $J = 8.0$  Hz, 1H), 7.29 (d,  $J = 8.2$  Hz, 1H), 7.20 (t,  $J = 7.8$  Hz, 1H), 7.06 (t,  $J = 7.4$  Hz, 1H), 6.95 (t,  $J = 7.6$  Hz, 1H), 6.67 (s, 1H), 6.50 (d,  $J = 7.9$  Hz, 1H), 6.26 (t,  $J = 7.4$  Hz, 1H), 5.94 – 5.87 (m, 1H), 5.72 (d,  $J = 7.5$  Hz, 1H), 5.34 – 5.25 (m, 2H), 4.81 (s, 1H), 4.27 (s, 1H), 4.14 (dd,  $J = 16.0, 5.1$  Hz, 1H), 3.96 (dd,  $J = 16.3, 5.9$  Hz, 1H), 3.70 (s, 3H), 3.04 (s, 3H), 1.63 (s, 3H).  $^{13}\text{C NMR}$  (126 MHz,  $\text{CDCl}_3$ )  $\delta$  173.8, 149.0, 136.8, 134.4, 133.0, 129.2, 128.7, 128.2, 126.1, 121.4, 119.1, 119.1, 118.3, 117.7, 109.5, 109.4, 108.6, 88.5, 52.8, 52.7, 50.2, 32.9, 28.8, 28.4. HRMS (ESI): calcd for  $\text{C}_{24}\text{H}_{25}\text{N}_3\text{ONa}$   $[\text{M} + \text{Na}]^+$ : 394.1895, Found: 394.1898.

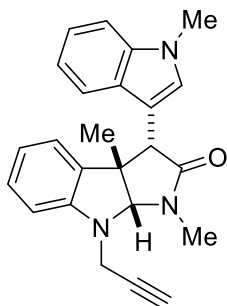

**1,3a-dimethyl-3-(1-methyl-1H-indol-3-yl)-8-(prop-2-yn-1-yl)-3,3a,8,8a-tetrahydropyrrolo[2,3-b]indol-2(1H)-one (3q):** white solid (39 mg, 53% yield);  $R_f = 0.40$  (PE:EA = 1:2);  $^1\text{H NMR}$  (500 MHz,  $\text{CDCl}_3$ )  $\delta$  7.45 (d,  $J = 7.9$  Hz, 1H), 7.29 (d,  $J = 8.2$  Hz, 1H), 7.20 (d,  $J = 6.6$  Hz, 1H), 7.05 (d,  $J = 7.5$  Hz, 1H), 7.01 (td,  $J = 7.6, 1.3$  Hz, 1H), 6.65 (s, 1H), 6.62 (d,  $J = 7.8$  Hz, 1H), 6.33 (t,  $J = 7.4$  Hz, 1H), 5.75 (d,  $J = 8.9$  Hz, 1H), 4.93 (s, 1H), 4.31 – 4.27 (m, 2H), 4.12 – 4.08 (m, 1H), 3.69 (s, 3H), 3.09 (s, 3H), 2.24 (t,  $J = 2.4$  Hz, 1H), 1.67 (s, 3H).  $^{13}\text{C NMR}$  (126 MHz,  $\text{CDCl}_3$ )  $\delta$  173.8, 148.0, 136.8, 133.7, 129.2, 128.7, 128.3, 126.2, 121.4, 119.6, 119.2, 119.1, 109.9, 109.4, 109.4, 88.2, 79.7, 72.7, 52.8, 50.2, 39.8, 32.9, 29.2, 28.2. HRMS (ESI): calcd for  $\text{C}_{24}\text{H}_{23}\text{N}_3\text{ONa}$   $[\text{M} + \text{Na}]^+$ : 392.1739, Found: 392.1743.

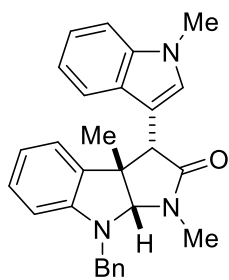

**8-benzyl-1,3a-dimethyl-3-(1-methyl-1H-indol-3-yl)-3,3a,8,8a-tetrahydropyrrolo[2,3-b]indol-2(1H)-one (3r):** white solid (51 mg, 61% yield);  $R_f = 0.44$  (PE:EA = 1:2);  $^1\text{H NMR}$  (500 MHz,  $\text{CDCl}_3$ )  $\delta$  7.53 – 7.51 (m, 1H), 7.34 (d,  $J = 8.3$  Hz, 1H), 7.23 (t,  $J = 7.1$  Hz, 1H), 7.10 – 7.06 (m, 4H), 6.98 (td,  $J = 7.6, 1.3$  Hz, 1H), 6.74 (s, 1H), 6.61 – 6.59 (m, 2H), 6.32 (t,  $J = 7.0$  Hz, 1H), 6.21 (d,  $J = 7.8$  Hz, 1H), 5.77 (d,  $J = 7.5$  Hz, 1H), 4.76 (s, 1H), 4.50 (s, 1H), 3.74 (s, 3H), 3.42 (d,  $J = 13.1$  Hz, 1H), 3.12 (d,  $J = 13.1$  Hz, 1H), 2.95 (s, 3H), 2.35 (s, 3H).  $^{13}\text{C NMR}$  (126 MHz,  $\text{CDCl}_3$ )  $\delta$  173.0, 151.3, 136.9, 136.8, 130.3, 129.8, 129.7, 128.8, 128.7, 127.9, 127.0, 126.8, 121.5, 119.2, 119.2, 117.9, 109.5, 109.3, 108.2, 86.6, 58.3, 49.9, 48.0, 35.9, 33.0, 27.8. HRMS (ESI): calcd for  $\text{C}_{28}\text{H}_{27}\text{N}_3\text{O}_2\text{Na}$   $[\text{M} + \text{Na}]^+$ : 444.2052, Found: 444.2055.

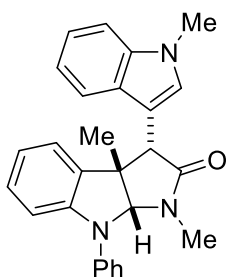

**1,3a-dimethyl-3-(1-methyl-1H-indol-3-yl)-8-phenyl-3,3a,8,8a-tetrahydropyrrolo[2,3-b]indol-2(1H)-one (3s):** white solid (17 mg, 24% yield);  $R_f = 0.37$  (PE:EA = 1:2);  $^1\text{H NMR}$  (500 MHz,  $\text{CDCl}_3$ )  $\delta$  7.55 (d,  $J = 8.0$  Hz, 1H), 7.38 – 7.35 (m, 5H), 7.25 (t,  $J = 7.6$  Hz, 1H), 7.13 – 7.09 (m, 2H), 7.04 (t,  $J = 7.7$  Hz, 1H), 6.97 (d,  $J = 7.9$  Hz, 1H), 6.78 (s, 1H), 6.46 (t,  $J = 7.4$  Hz, 1H), 5.77 (d,  $J = 7.6$  Hz, 1H), 5.28 (s, 1H), 4.38 (s, 1H), 3.76 (s, 3H), 3.05 (s, 3H), 1.65 (s, 3H).  $^{13}\text{C NMR}$  (126 MHz,  $\text{CDCl}_3$ )  $\delta$  173.4, 145.4, 145.2, 136.8, 134.6, 129.9, 129.8, 128.7, 128.7, 127.9, 127.1, 123.5, 121.5, 120.3, 120.3, 119.3, 112.9, 109.5, 108.4, 89.3, 53.5, 49.5, 33.0, 28.5, 27.6. HRMS (ESI): calcd for  $\text{C}_{27}\text{H}_{25}\text{N}_3\text{O}_2\text{Na}$   $[\text{M} + \text{Na}]^+$ : 430.1890, Found: 430.1895.

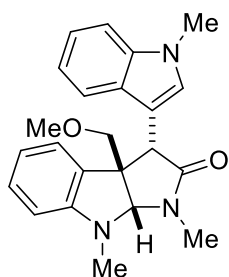

**3a-(methoxymethyl)-1,8-dimethyl-3-(1-methyl-1H-indol-3-yl)-3,3a,8,8a-tetrahydropyrrolo[2,3-b]indol-2(1H)-one (4a):** white solid (46 mg, 61% yield);  $R_f = 0.54$  (PE:EA = 1:2);  $^1\text{H NMR}$  (500 MHz,  $\text{CDCl}_3$ )  $\delta$  7.49 (d,  $J = 8.0$  Hz, 1H), 7.31 (d,  $J = 8.1$  Hz, 1H), 7.21 (t,  $J = 7.5$  Hz, 1H), 7.08 (t,  $J = 7.5$  Hz, 1H), 7.02 (t,  $J = 7.6$  Hz, 1H), 6.68 (s, 1H), 6.44 (d,  $J = 7.8$  Hz, 1H), 6.24 (t,  $J = 7.4$  Hz, 1H), 5.59 (d,  $J = 7.4$  Hz, 1H), 5.03 (s, 1H), 4.82 (s, 1H), 3.71 (s, 3H), 3.57 (d,  $J = 9.6$  Hz, 1H), 3.51 (s, 3H), 3.29 (d,  $J = 9.6$  Hz, 1H), 3.16 (s, 3H), 3.04 (s, 3H).  $^{13}\text{C NMR}$  (126 MHz,  $\text{CDCl}_3$ )  $\delta$  174.0, 150.3, 136.7, 129.7, 129.1, 129.1, 128.3, 126.6, 121.5, 119.2, 118.6, 117.4, 109.4, 109.0, 107.3, 85.1, 74.6, 59.2, 57.4, 42.8, 35.8, 32.9, 28.8. HRMS (ESI): calcd for  $\text{C}_{23}\text{H}_{25}\text{N}_3\text{O}_2\text{Na}$   $[\text{M} + \text{Na}]^+$ : 398.1844, Found: 398.1849.

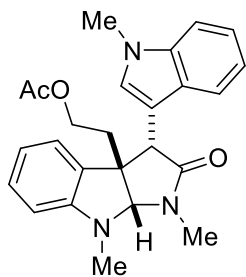

**2-(1,8-dimethyl-3-(1-methyl-1H-indol-3-yl)-2-oxo-2,3,8,8a-tetrahydropyrrolo[2,3-b]indol-3a(1H)-yl)ethyl acetate (4b):** white solid (44 mg, 41% yield);  $R_f = 0.42$  (PE:EA = 1:2);  $^1\text{H NMR}$  (500 MHz,  $\text{CDCl}_3$ )  $\delta$  7.40 (d,  $J = 7.6$  Hz, 1H), 7.29 (d,  $J = 8.2$  Hz, 1H), 7.19 (t,  $J = 7.2$  Hz, 1H), 7.04 (t,  $J = 7.4$  Hz, 1H), 6.98 (td,  $J = 7.6, 1.3$  Hz, 1H), 6.64 (s, 1H), 6.40 (d,  $J = 7.7$  Hz, 1H), 6.22 (t,  $J = 7.6$  Hz, 1H), 5.63 (d,  $J = 8.7$  Hz, 1H), 4.98 (s, 1H), 4.30 (s, 1H), 3.87 – 3.82 (m, 1H), 3.76 – 3.72 (m, 1H), 3.70 (s, 3H), 3.13 (s, 3H), 3.06 (s, 3H), 2.45 – 2.40 (m, 1H), 2.32 – 2.26 (m, 1H), 1.98 (s, 3H).  $^{13}\text{C NMR}$  (126 MHz,  $\text{CDCl}_3$ )  $\delta$  173.3, 170.9, 150.1, 136.8, 129.7, 128.9, 128.7, 128.6, 126.4, 121.5, 119.3, 119.0, 117.8, 109.5, 108.9, 107.2, 87.6, 61.3, 54.8, 49.8, 39.8, 35.8, 32.9, 28.7, 21.1. HRMS (ESI): calcd for  $\text{C}_{25}\text{H}_{27}\text{N}_3\text{O}_3\text{Na}$   $[\text{M} + \text{Na}]^+$ : 440.1950, Found: 440.1954.



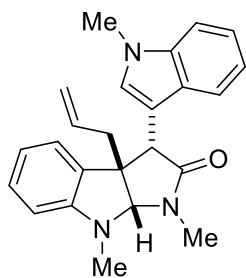

**3a-allyl-1,8-dimethyl-3-(1-methyl-1*H*-indol-3-yl)-3,3a,8,8a-tetrahydropyrrolo[2,3-*b*]indol-2(1*H*)-one (4c):** Yellow oil (50 mg, 67% yield);  $R_f = 0.48$  (PE:EA = 1:2);  $^1\text{H NMR}$  (500 MHz,  $\text{CDCl}_3$ )  $\delta$  7.42 (d,  $J = 8.0$  Hz, 1H), 7.27 (d,  $J = 8.2$  Hz, 1H), 7.20 – 7.16 (m, 1H), 7.03 (t,  $J = 8.0$  Hz, 1H), 6.97 (td,  $J = 7.6, 1.3$  Hz, 1H), 6.63 (s, 1H), 6.42 (d,  $J = 7.4$  Hz, 1H), 6.22 (td,  $J = 7.5, 1.0$  Hz, 1H), 5.71 (dd,  $J = 7.5, 1.3$  Hz, 1H), 5.48 – 5.39 (m, 1H), 5.18 (d,  $J = 15.8$  Hz, 1H), 5.10 (d,  $J = 10.0$  Hz, 1H), 4.78 (s, 1H), 4.34 (s, 1H), 3.68 (s, 3H), 3.08 (s, 3H), 3.05 (s, 3H), 2.79 – 2.75 (m, 1H), 2.65 – 2.60 (m, 1H).  $^{13}\text{C NMR}$  (126 MHz,  $\text{CDCl}_3$ )  $\delta$  173.8, 150.7, 136.8, 134.0, 130.6, 129.4, 128.7, 128.5, 126.2, 121.4, 119.2, 119.0, 119.0, 117.9, 109.5, 109.4, 107.5, 87.6, 56.3, 48.6, 45.6, 36.4, 32.9, 28.5. HRMS (ESI): calcd for  $\text{C}_{24}\text{H}_{25}\text{N}_3\text{ONa}$  [ $\text{M} + \text{Na}$ ] $^+$ : 394.1895, Found: 394.1899.

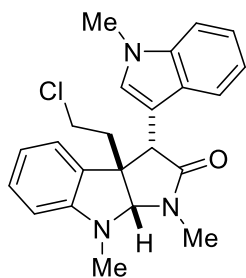

**3a-(2-chloroethyl)-1,8-dimethyl-3-(1-methyl-1*H*-indol-3-yl)-3,3a,8,8a-tetrahydropyrrolo[2,3-*b*]indol-2(1*H*)-one (4d):** white solid (47 mg, 55% yield)  $R_f = 0.41$  (PE:EA = 1:2);  $^1\text{H NMR}$  (500 MHz,  $\text{CDCl}_3$ )  $\delta$  7.34 (d,  $J = 7.9$  Hz, 1H), 7.29 (d,  $J = 8.3$  Hz, 1H), 7.21 – 7.18 (m, 1H), 7.05 (t,  $J = 7.5$  Hz, 1H), 7.01 (td,  $J = 7.7, 1.3$  Hz, 1H), 6.65 (s, 1H), 6.42 (d,  $J = 7.7$  Hz, 1H), 6.24 (t,  $J = 7.0$  Hz, 1H), 5.66 (dd,  $J = 7.6, 1.2$  Hz, 1H), 4.91 (s, 1H), 4.25 (s, 1H), 3.70 (s, 3H), 3.13 (s, 3H), 3.06 (s, 3H), 2.93 – 2.89 (m, 1H), 2.76 – 2.71 (m, 1H), 2.56–2.54 (m, 2H).  $^{13}\text{C NMR}$  (126 MHz,  $\text{CDCl}_3$ )  $\delta$  173.1, 150.2, 136.8, 129.8, 129.1, 128.6, 128.0, 126.5, 121.6, 119.4, 119.0, 117.8, 109.5, 108.6, 107.1, 87.2, 55.7, 49.8, 44.2, 40.6, 35.6, 33.0, 28.8. HRMS (ESI): calcd for  $\text{C}_{23}\text{H}_{24}\text{ClN}_3\text{ONa}$  [ $\text{M} + \text{Na}$ ] $^+$ : 416.1506, Found: 416.1506.

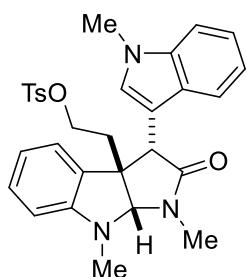

**2-(1,8-dimethyl-3-(1-methyl-1*H*-indol-3-yl)-2-oxo-2,3,8,8a-tetrahydropyrrolo[2,3-*b*]indol-3a(1*H*)-yl)ethyl 4-methylbenzenesulfonate (4e):** white solid (52 mg, 51% yield);  $R_f = 0.32$  (PE:EA = 1:2);  $^1\text{H NMR}$  (500 MHz,  $\text{CDCl}_3$ )  $\delta$  7.64 (s, 1H), 7.62 (s, 1H), 7.32 – 7.26 (m, 4H), 7.18 (t,  $J = 7.1$  Hz, 1H), 7.02 – 6.97 (m, 2H), 6.62 (s, 1H), 6.39 (d,  $J = 7.8$  Hz, 1H), 6.17 (t,  $J = 7.9$  Hz, 1H), 5.46 (d,  $J = 7.5$  Hz, 1H), 5.02 (s, 1H), 4.25 (s, 1H), 3.78 – 3.75 (m, 1H), 3.69 (s, 3H), 3.60 – 3.55 (m, 1H), 3.14 (s, 3H), 3.03 (s, 3H), 2.41 (s, 3H), 2.39 – 2.33 (m, 2H).  $^{13}\text{C NMR}$  (126 MHz,  $\text{CDCl}_3$ )  $\delta$  172.8, 150.3, 145.0, 136.7, 132.7, 130.0, 129.8, 129.1, 128.6, 128.0, 127.7, 126.3, 121.5, 119.3, 118.8, 117.5, 109.5, 108.4, 107.0, 87.3, 67.7, 54.8, 49.7, 40.1, 35.5, 33.0, 28.7, 21.8. HRMS (ESI): calcd for  $\text{C}_{30}\text{H}_{31}\text{N}_3\text{O}_4\text{SNa}$  [ $\text{M} + \text{Na}$ ] $^+$ : 529.2035, Found: 529.2038.

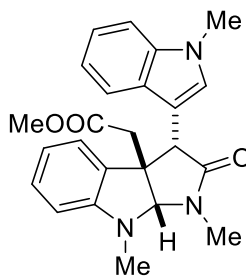

**methyl 2-(1,8-dimethyl-3-(1-methyl-1*H*-indol-3-yl)-2-oxo-2,3,8,8a-tetrahydropyrrolo[2,3-*b*]indol-3a(1*H*)-yl)acetate (4f):** Yellow oil (18 mg, 23% yield);  $R_f = 0.38$  (PE:EA = 1:2);  $^1\text{H NMR}$  (500 MHz,  $\text{CDCl}_3$ )  $\delta$  7.42 (d,  $J = 8.0$  Hz, 1H), 7.29 (d,  $J = 8.2$  Hz, 1H), 7.19 (t,  $J = 7.1$  Hz, 1H), 7.04 (t,  $J = 7.5$  Hz, 1H), 6.98 (td,  $J = 7.6, 1.3$  Hz, 1H), 6.66 (s, 1H), 6.42 (d,  $J = 7.8$  Hz, 1H), 6.20 (t,  $J = 7.4$  Hz, 1H), 5.64 (d,  $J = 7.6$  Hz, 1H), 5.30 (s, 1H), 4.48 (s, 1H), 3.69 (s, 3H), 3.64 (s, 3H), 3.15 (s, 3H), 3.08 (s, 3H), 2.96 (d,  $J = 15.4$  Hz, 1H), 2.82 (d,  $J = 15.3$  Hz, 1H).  $^{13}\text{C NMR}$  (126 MHz,  $\text{CDCl}_3$ )  $\delta$  173.2, 171.2, 150.0, 136.8, 129.7, 129.6, 128.9, 128.6, 126.4, 121.5, 119.4, 118.8, 117.6, 109.4, 108.9, 107.5, 87.0, 53.8, 51.9, 47.5, 43.6, 36.3, 32.9, 28.8. HRMS (ESI): calcd for  $\text{C}_{24}\text{H}_{25}\text{N}_3\text{O}_3\text{Na}$  [ $\text{M} + \text{Na}$ ] $^+$ : 426.1794, Found: 426.1801.

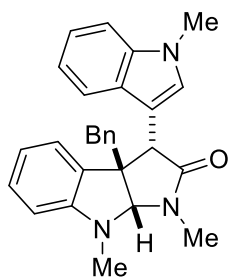

**3a-benzyl-1,8-dimethyl-3-(1-methyl-1H-indol-3-yl)-3,3a,8,8a-tetrahydropyrrolo[2,3-b]indol-2(1H)-one (4g):** white solid (60 mg, 72% yield);  $R_f = 0.39$  (PE:EA = 1:2);  $^1\text{H NMR}$  (500 MHz,  $\text{CDCl}_3$ )  $\delta$  7.52 (d,  $J = 8.0$  Hz, 1H), 7.35 (d,  $J = 8.2$  Hz, 1H), 7.23 (t,  $J = 7.5$  Hz, 1H), 7.10 – 7.07 (m, 4H), 6.98 (t,  $J = 7.6$  Hz, 1H), 6.75 (s, 1H), 6.62 (s, 1H), 6.60 (d,  $J = 2.7$  Hz, 1H), 6.33 (t,  $J = 7.4$  Hz, 1H), 6.22 (d,  $J = 7.8$  Hz, 1H), 5.77 (d,  $J = 7.7$  Hz, 1H), 4.76 (s, 1H), 4.50 (s, 1H), 3.74 (s, 3H), 3.42 (d,  $J = 13.0$  Hz, 1H), 3.13 (d,  $J = 13.1$  Hz, 1H), 2.95 (s, 3H), 2.35 (s, 3H).  $^{13}\text{C NMR}$  (126 MHz,  $\text{CDCl}_3$ )  $\delta$  173.0, 151.3, 136.9, 136.8, 130.4, 129.8, 129.7, 128.9, 128.7, 127.9, 127.1, 126.8, 121.5, 119.2, 119.2, 118.0, 109.5, 109.3, 108.2, 86.6, 58.3, 49.9, 48.0, 35.9, 33.0, 27.8. HRMS (ESI): calcd for  $\text{C}_{28}\text{H}_{27}\text{N}_3\text{ONa}$   $[\text{M} + \text{Na}]^+$ : 444.2052, Found: 444.2055.

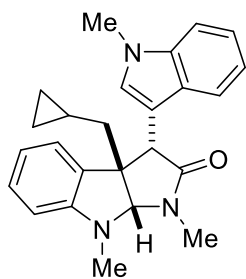

**3a-(cyclopropylmethyl)-1,8-dimethyl-3-(1-methyl-1H-indol-3-yl)-3,3a,8,8a-tetrahydropyrrolo[2,3-b]indol-2(1H)-one (4h):** white solid (42 mg, 54% yield);  $R_f = 0.33$  (PE:EA = 1:2);  $^1\text{H NMR}$  (500 MHz,  $\text{CDCl}_3$ )  $\delta$  7.39 (d,  $J = 8.0$  Hz, 1H), 7.27 (d,  $J = 8.0$  Hz, 1H), 7.17 (t,  $J = 8.1$  Hz, 1H), 7.03 (t,  $J = 7.5$  Hz, 1H), 6.97 (td,  $J = 7.6, 1.3$  Hz, 1H), 6.65 (s, 1H), 6.42 (d,  $J = 7.8$  Hz, 1H), 6.22 (t,  $J = 7.0$  Hz, 1H), 5.68 (d,  $J = 7.8$  Hz, 1H), 5.03 (s, 1H), 4.34 (s, 1H), 3.69 (s, 3H), 3.14 (s, 3H), 3.07 (s, 3H), 2.08 (dd,  $J = 14.0, 5.5$  Hz, 1H), 1.73 (dd,  $J = 14.0, 7.3$  Hz, 1H), 0.89 – 0.83 (m, 1H), 0.49 – 0.44 (m, 1H), 0.41 – 0.37 (m, 1H), 0.31 – 0.26 (m, 1H), 0.18 – 0.14 (m, 1H).  $^{13}\text{C NMR}$  (126 MHz,  $\text{CDCl}_3$ )  $\delta$  174.0, 150.8, 136.8, 131.2, 129.5, 128.9, 128.4, 126.4, 122.0, 121.4, 119.2, 119.2, 117.8, 109.7, 109.4, 107.4, 87.7, 57.2, 49.2, 46.2, 36.6, 33.0, 28.6, 6.9, 5.2, 4.1. HRMS (ESI): calcd for  $\text{C}_{25}\text{H}_{27}\text{N}_3\text{ONa}$   $[\text{M} + \text{Na}]^+$ : 408.2052, Found: 408.2056.

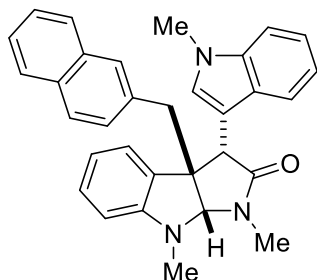

**1,8-dimethyl-3-(1-methyl-1H-indol-3-yl)-3a-(naphthalen-2-ylmethyl)-3,3a,8,8a-tetrahydropyrrolo[2,3-b]indol-2(1H)-one (4i):** white solid (62 mg, 67% yield);  $R_f = 0.35$  (PE:EA = 1:2);  $^1\text{H NMR}$  (500 MHz,  $\text{CDCl}_3$ )  $\delta$  7.70 – 7.68 (m, 1H), 7.60 – 7.55 (m, 2H), 7.51 (d,  $J = 8.4$  Hz, 1H), 7.39 – 7.37 (m, 2H), 7.35 (d,  $J = 8.3$  Hz, 1H), 7.25 – 7.22 (m, 1H), 7.13 (s, 1H), 7.08 (t,  $J = 7.4$  Hz, 1H), 6.98 (td,  $J = 7.6, 1.3$  Hz, 1H), 6.76 (s, 1H), 6.58 (dd,  $J = 8.5, 1.8$  Hz, 1H), 6.37 (td,  $J = 7.4, 1.0$  Hz, 1H), 6.13 (d,  $J = 7.3$  Hz, 1H), 5.82 (dd,  $J = 7.5, 1.3$  Hz, 1H), 4.81 (s, 1H), 4.55 (s, 1H), 3.74 (s, 3H), 3.57 (d,  $J = 13.1$  Hz, 1H), 3.28 (d,  $J = 13.2$  Hz, 1H), 2.93 (d,  $J = 0.7$  Hz, 3H), 2.15 (s, 3H).  $^{13}\text{C NMR}$  (126 MHz,  $\text{CDCl}_3$ )  $\delta$  172.9, 151.3, 136.8, 134.5, 133.1, 132.2, 130.3, 129.7, 128.8, 128.7, 128.3, 127.9, 127.5, 127.4, 127.2, 127.1, 125.9, 125.5, 121.4, 119.2, 119.1, 117.9, 109.5, 109.2, 108.1, 86.6, 58.4, 49.9, 48.1, 35.7, 32.9, 27.7. HRMS (ESI): calcd for  $\text{C}_{32}\text{H}_{29}\text{N}_3\text{ONa}$   $[\text{M} + \text{Na}]^+$ : 494.2208, Found: 494.2213.

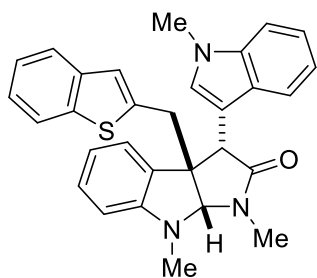

**3a-(benzo[*b*]thiophen-2-ylmethyl)-1,8-dimethyl-3-(1-methyl-1H-indol-3-yl)-3,3a,8,8a-tetrahydropyrrolo[2,3-b]indol-2(1H)-one (4j):** white solid (54 mg, 58% yield);  $R_f = 0.48$  (PE:EA = 1:2);  $^1\text{H NMR}$  (500 MHz,  $\text{CDCl}_3$ )  $\delta$  7.66 (d,  $J = 6.8$  Hz, 1H), 7.61 (d,  $J = 9.7$  Hz, 1H), 7.49 (d,  $J = 8.2$  Hz, 1H), 7.33 (d,  $J = 8.2$  Hz, 1H), 7.30 – 7.26 (m, 1H), 7.25 – 7.21 (m, 2H), 7.08 (d,  $J = 7.4$  Hz, 1H), 7.04 (td,  $J = 7.7, 1.3$  Hz, 1H), 6.73 (s, 1H), 6.72 (s, 1H), 6.36 – 6.32 (m, 2H), 5.82 (d,  $J = 8.9$  Hz, 1H), 4.95 (s, 1H), 4.51 (s, 1H), 3.72 (s, 3H), 3.59 (d,  $J = 14.5$  Hz, 1H), 3.48 (d,  $J = 14.5$  Hz, 1H), 3.01 (s, 3H), 2.61 (s, 3H).  $^{13}\text{C NMR}$  (126 MHz,  $\text{CDCl}_3$ )  $\delta$  173.1, 151.4, 139.9, 139.6, 139.5, 136.8, 130.0, 129.6, 129.1, 128.7, 126.6, 124.2, 123.9, 123.5, 123.0, 122.1, 121.5, 119.3, 119.0, 118.1, 109.5, 109.2,

108.4, 87.2, 57.4, 49.3, 42.5, 36.4, 33.0, 28.2. HRMS (ESI): calcd for C<sub>30</sub>H<sub>27</sub>N<sub>3</sub>OSNa [M + Na]<sup>+</sup>: 500.1773, Found: 500.1774.

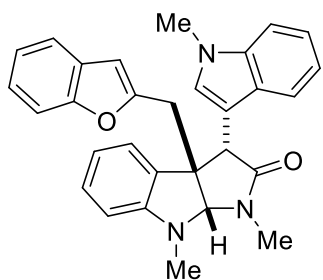

**3a-(benzofuran-2-ylmethyl)-1,8-dimethyl-3-(1-methyl-1H-indol-3-yl)-3,3a,8,8a-tetrahydropyrrolo[2,3-b]indol-2(1H)-one (4k):**

White solid (44 mg, 48% yield); R<sub>f</sub> = 0.55 (PE:EA = 1:2); <sup>1</sup>H NMR (500 MHz, CDCl<sub>3</sub>) δ 7.57 (d, *J* = 7.5 Hz, 1H), 7.46 – 7.45 (m, 2H), 7.33 (d, *J* = 8.2 Hz, 1H), 7.27 – 7.18 (m, 3H), 7.09 (t, *J* = 7.2 Hz, 1H), 6.99 (td, *J* = 7.6, 1.3 Hz, 1H), 6.73 (s, 1H), 6.34 (d, *J* = 8.3 Hz, 1H), 6.28 (t, *J* = 7.0 Hz, 1H), 6.15 (s, 1H), 5.75 (dd, *J* = 7.5, 1.3 Hz, 1H), 5.19 (s, 1H), 4.62 (s, 1H), 3.72 (s, 3H), 3.42 (d, *J* = 14.9 Hz, 1H), 3.30 (d, *J* = 14.9 Hz, 1H), 3.03 (s, 3H), 2.93 (s, 3H). <sup>13</sup>C NMR (126 MHz, CDCl<sub>3</sub>) δ 173.2, 154.8, 154.7, 150.3, 136.8, 130.3, 129.7, 128.8, 128.7, 128.4, 126.4, 123.9, 122.8, 121.5, 120.7, 119.3, 119.2, 117.7, 110.9, 109.4, 109.1, 107.6, 105.4, 87.2, 56.3, 47.8, 39.3, 36.2, 32.9, 28.5. HRMS (ESI): calcd for C<sub>30</sub>H<sub>27</sub>N<sub>3</sub>O<sub>2</sub>Na [M + Na]<sup>+</sup>: 484.2001, Found: 484.2000.

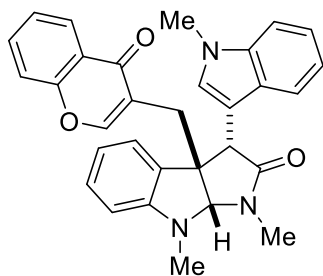

**1,8-dimethyl-3-(1-methyl-1H-indol-3-yl)-3a-((4-oxo-4H-chromen-3-yl)methyl)-3,3a,8,8a-tetrahydropyrrolo[2,3-b]indol-2(1H)-one (4l):**

White solid (44 mg, 47% yield); R<sub>f</sub> = 0.53 (PE:EA = 1:2); <sup>1</sup>H NMR (500 MHz, CDCl<sub>3</sub>) δ 8.16 (dd, *J* = 8.1, 1.7 Hz, 1H), 7.54 – 7.51 (m, 2H), 7.33 – 7.28 (m, 2H), 7.20 – 7.15 (m, 2H), 7.02 (t, *J* = 7.5 Hz, 1H), 6.93 (t, *J* = 7.0 Hz, 1H), 6.72 (s, 1H), 6.38 (s, 1H), 6.27 (t, *J* = 7.4 Hz, 1H), 6.10 (d, *J* = 7.8 Hz, 1H), 5.62 (d, *J* = 7.5 Hz, 1H), 5.16 (s, 1H), 4.50 (s, 1H), 3.69 (s, 3H), 3.59 (d, *J* = 13.3 Hz, 1H), 2.86 (s, 3H), 2.58 (d, *J* = 13.3 Hz, 1H), 2.53 (s, 3H). <sup>13</sup>C NMR (126 MHz, CDCl<sub>3</sub>) δ 178.1, 172.8, 155.9, 154.1, 150.3, 136.8, 133.6, 130.1, 129.1, 129.0, 128.8, 126.9, 125.8, 125.2, 123.6, 121.5, 119.5, 119.3, 119.1, 118.2, 117.4, 109.6, 108.7, 107.0, 85.7, 58.1, 49.0, 35.4, 34.6, 33.0, 28.0. HRMS (ESI): calcd for C<sub>31</sub>H<sub>27</sub>N<sub>3</sub>O<sub>3</sub>Na [M + Na]<sup>+</sup>: 512.1950, Found: 512.1954.

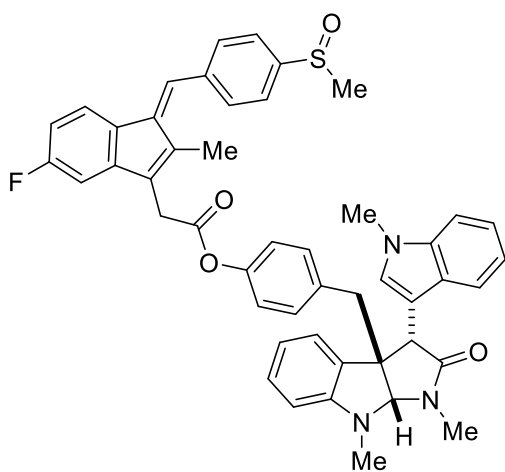

**4-((1,8-dimethyl-3-(1-methyl-1H-indol-3-yl)-2-oxo-2,3,8,8a-tetrahydropyrrolo[2,3-b]indol-3a(1H)-yl)methyl)phenyl (E)-2-(5-fluoro-2-methyl-1-(4-(methylsulfinyl)benzylidene)-1H-inden-3-yl)acetate (4m):**

yellow solid (79 mg, 50% yield); R<sub>f</sub> = 0.29 (only EA); <sup>1</sup>H NMR (500 MHz, CDCl<sub>3</sub>) δ 7.72 (d, *J* = 8.3 Hz, 2H), 7.67 (d, *J* = 8.2 Hz, 2H), 7.51 – 7.49 (m, 1H), 7.33 (d, *J* = 8.2 Hz, 1H), 7.22 (t, *J* = 7.6 Hz, 1H), 7.18 – 7.16 (m, 2H), 7.07 (t, *J* = 7.5 Hz, 1H), 6.98 – 6.92 (m, 2H), 6.77 (d, *J* = 8.6 Hz, 2H), 6.73 (s, 1H), 6.58 (td, *J* = 8.8, 2.5 Hz, 1H), 6.54 (d, *J* = 8.5 Hz, 2H), 6.30 (t, *J* = 6.8 Hz, 1H), 6.21 (d, *J* = 7.8 Hz, 1H), 5.72 (d, *J* = 7.5 Hz, 1H), 4.71 (s, 1H), 4.47 (s, 1H), 3.74 (s, 2H), 3.73 (s, 3H), 3.39 (d, *J* = 13.1 Hz, 1H), 3.11 (d, *J* = 13.1 Hz, 1H), 2.93 (s, 3H), 2.81 (s, 3H), 2.38 (s, 3H), 2.25 (s, 3H). <sup>13</sup>C NMR (126 MHz, CDCl<sub>3</sub>) δ 172.9, 168.8, 164.4 (d, *J* = 247.2 Hz), 151.3, 149.5, 146.6 (d, *J* = 9.1 Hz), 145.7, 141.6, 139.6, 138.8, 136.8, 134.8, 131.3 (d, *J* = 2.7 Hz), 130.5, 130.3, 129.9, 129.8, 129.6 (d, *J* = 3.5 Hz), 128.8, 128.8, 128.7, 127.0, 124.0, 123.9 (d, *J* = 8.5 Hz), 121.5, 120.9, 119.2, 119.1, 117.8, 110.9 (d, *J* = 22.5 Hz), 109.5, 109.1, 108.2, 106.0 (d, *J* = 23.9 Hz), 86.5, 58.2, 50.0, 47.4, 44.0, 35.8, 33.0, 31.9, 27.7,

10.8.  $^{19}\text{F}$  NMR (471 MHz,  $\text{CDCl}_3$ )  $\delta$  -112.73. HRMS (ESI): calcd for  $\text{C}_{48}\text{H}_{42}\text{FN}_3\text{O}_4\text{SNa}$   $[\text{M} + \text{Na}]^+$ : 798.2778, Found: 798.2772.

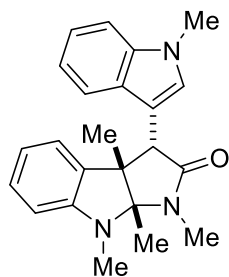

**1,3a,8,8a-tetramethyl-3-(1-methyl-1H-indol-3-yl)-3,3a,8,8a-tetrahydropyrrolo[2,3-b]indol-2(1H)-one (4n):** white solid (17 mg, 24% yield);  $R_f=0.37$  (PE:EA = 1:2);  $^1\text{H}$  NMR (500 MHz,  $\text{CDCl}_3$ )  $\delta$  7.58 (d,  $J = 8.0$  Hz, 1H), 7.37 (d,  $J = 8.2$  Hz, 1H), 7.24 (t,  $J = 7.4$  Hz, 1H), 7.12 (t,  $J = 7.5$  Hz, 1H), 7.04 (t,  $J = 7.3$  Hz, 1H), 6.82 (s, 1H), 6.39 (d,  $J = 7.8$  Hz, 1H), 6.33 (t,  $J = 7.4$  Hz, 1H), 5.72 (d,  $J = 7.4$  Hz, 1H), 4.26 (s, 1H), 3.78 (s, 3H), 3.07 (s, 3H), 2.90 (s, 3H), 1.65 (s, 3H), 1.43 (s, 3H).  $^{13}\text{C}$  NMR (126 MHz,  $\text{CDCl}_3$ )  $\delta$  172.7,

148.3, 136.8, 131.5, 130.5, 128.9, 128.2, 126.7, 121.4, 119.4, 119.1, 117.2, 109.5, 107.9, 105.7, 86.8, 55.9, 48.5, 33.1, 29.9, 26.7, 23.7, 15.9. HRMS (ESI): calcd for  $\text{C}_{23}\text{H}_{25}\text{N}_3\text{O}$   $[\text{M} + \text{Na}]^+$ : 382.1895, Found: 382.1899.

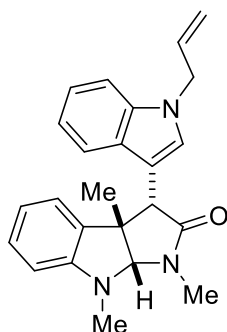

**3-(1-allyl-1H-indol-3-yl)-1,3a,8-trimethyl-3,3a,8,8a-tetrahydropyrrolo[2,3-b]indol-2(1H)-one (5a):** white solid (62 mg, 74% yield);  $R_f=0.43$  (PE:EA = 1:2);  $^1\text{H}$  NMR (500 MHz,  $\text{CDCl}_3$ )  $\delta$  7.55 (d,  $J = 7.9$  Hz, 1H), 7.28 (d,  $J = 8.2$  Hz, 1H), 7.19 (t,  $J = 7.8$  Hz, 1H), 7.09 (t,  $J = 7.5$  Hz, 1H), 6.97 (t,  $J = 7.0$  Hz, 1H), 6.68 (s, 1H), 6.42 (d,  $J = 7.8$  Hz, 1H), 6.24 (t,  $J = 7.4$  Hz, 1H), 5.92 – 5.84 (m, 1H), 5.77 (d,  $J = 7.5$  Hz, 1H), 5.13 – 5.11 (m, 1H), 4.98 – 4.95 (m, 1H), 4.73 (s, 1H), 4.69 – 4.65 (m, 1H), 4.60 – 4.55 (m, 1H), 4.27 (s, 1H), 3.15 (s, 3H), 3.08 (s, 3H), 1.66 (s, 3H).  $^{13}\text{C}$  NMR (126 MHz,  $\text{CDCl}_3$ )  $\delta$  174.1, 149.6, 136.1, 133.5, 132.3, 128.9, 128.3, 128.2, 125.9, 121.5, 119.3, 119.1,

117.8, 117.0, 110.1, 109.8, 107.2, 90.4, 52.5, 50.2, 48.8, 36.2, 29.0, 28.6. HRMS (ESI): calcd for  $\text{C}_{24}\text{H}_{25}\text{N}_3\text{O}$   $[\text{M} + \text{Na}]^+$ : 394.1895, Found: 394.1898.

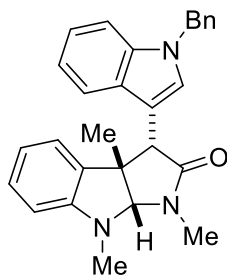

**3-(1-benzyl-1H-indol-3-yl)-1,3a,8-trimethyl-3,3a,8,8a-tetrahydropyrrolo[2,3-b]indol-2(1H)-one (5b):** white solid (63 mg, 76% yield);  $R_f=0.52$  (PE:EA = 1:2);  $^1\text{H}$  NMR (500 MHz,  $\text{CDCl}_3$ )  $\delta$  7.58 (d,  $J = 7.8$  Hz, 1H), 7.28 – 7.23 (m, 3H), 7.19 (d,  $J = 8.0$  Hz, 1H), 7.13 (t,  $J = 8.2$  Hz, 1H), 7.08 (t,  $J = 7.5$  Hz, 1H), 7.00 – 6.96 (m, 3H), 6.75 (s, 1H), 6.39 (d,  $J = 7.7$  Hz, 1H), 6.23 (t,  $J = 7.9$  Hz, 1H), 5.85 (d,  $J = 6.2$  Hz, 1H), 5.25 (d,  $J = 16.2$  Hz, 1H), 5.14 (d,  $J = 16.2$  Hz, 1H), 4.72 (s, 1H), 4.28 (s, 1H), 3.12 (s, 3H), 3.08 (s, 3H), 1.66 (s, 3H).  $^{13}\text{C}$  NMR (126 MHz,  $\text{CDCl}_3$ )  $\delta$  174.2, 149.8, 137.7, 136.1, 132.2, 129.0, 128.7, 128.4, 128.2, 127.5, 126.8, 125.8, 121.7, 119.4, 119.0, 117.9, 110.5, 110.0, 107.2, 90.7, 52.5, 50.3, 50.2, 36.2, 29.0, 28.7. HRMS (ESI): calcd for  $\text{C}_{28}\text{H}_{27}\text{N}_3\text{O}$   $[\text{M} + \text{Na}]^+$ : 444.2052, Found: 444.2055.

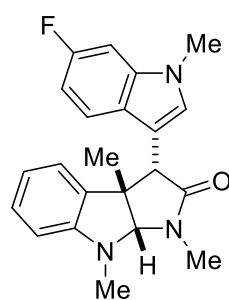

**3-(6-fluoro-1-methyl-1H-indol-3-yl)-1,3a,8-trimethyl-3,3a,8,8a-tetrahydropyrrolo[2,3-b]indol-2(1H)-one (5c):** white solid (47 mg, 63% yield);  $R_f=0.49$  (PE:EA = 1:2);  $^1\text{H}$  NMR (500 MHz,  $\text{CDCl}_3$ )  $\delta$  7.29 – 7.26 (m, 1H), 6.97 (td,  $J = 7.6, 1.3$  Hz, 1H), 6.93 (dd,  $J = 9.8, 2.3$  Hz, 1H), 6.77 (td,  $J = 9.0, 2.2$  Hz, 1H), 6.68 (s, 1H), 6.42 (d,  $J = 7.9$  Hz, 1H), 6.24 (td,  $J = 7.5, 1.1$  Hz, 1H), 5.75 (dd,  $J = 7.4, 1.2$  Hz, 1H), 4.72 (s, 1H), 4.17 (s, 1H), 3.64 (s, 3H), 3.15 (s, 3H), 3.07 (s, 3H), 1.61 (s, 3H).  $^{13}\text{C}$  NMR (126 MHz,  $\text{CDCl}_3$ )  $\delta$  173.8, 159.8 (d,  $J = 236.8$  Hz), 149.7, 136.9 (d,  $J = 12.0$  Hz), 132.1, 129.5 (d,  $J = 3.6$  Hz), 128.4, 125.7, 125.0, 120.0 (d,  $J = 10.2$  Hz), 117.9, 109.9, 107.9 (d,  $J = 24.7$  Hz), 107.4, 95.7 (d,  $J = 25.8$  Hz).

128.4, 125.7, 125.0, 120.0 (d,  $J = 10.2$  Hz), 117.9, 109.9, 107.9 (d,  $J = 24.7$  Hz), 107.4, 95.7 (d,  $J = 25.8$  Hz).

Hz), 90.4, 52.3, 50.5, 36.2, 33.0, 28.9, 28.7.  $^{19}\text{F}$  NMR (471 MHz,  $\text{CDCl}_3$ )  $\delta$  -121.53. HRMS (ESI): calcd for  $\text{C}_{22}\text{H}_{22}\text{FN}_3\text{ONa}$   $[\text{M} + \text{Na}]^+$ : 386.1645, Found: 386.1649.

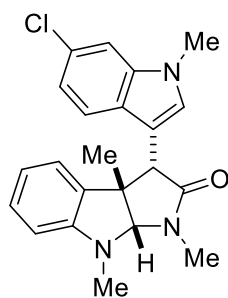

**3-(6-chloro-1-methyl-1H-indol-3-yl)-1,3a,8-trimethyl-3,3a,8,8a-tetrahydropyrrolo[2,3-b]indol-2(1H)-one (5d):** white solid (52 mg, 68% yield);  $R_f$  = 0.35 (PE:EA = 1:2);  $^1\text{H}$  NMR (500 MHz,  $\text{CDCl}_3$ )  $\delta$  7.30 (d,  $J$  = 8.5 Hz, 1H), 7.26 (s, 1H), 7.00 – 6.97 (m, 2H), 6.68 (s, 1H), 6.42 (d,  $J$  = 7.8 Hz, 1H), 6.24 (td,  $J$  = 7.4, 1.0 Hz, 1H), 5.72 (dd,  $J$  = 7.6, 1.3 Hz, 1H), 4.72 (s, 1H), 4.17 (s, 1H), 3.65 (s, 3H), 3.15 (s, 3H), 3.07 (s, 3H), 1.61 (s, 3H).  $^{13}\text{C}$  NMR (126 MHz,  $\text{CDCl}_3$ )  $\delta$  173.7, 149.6, 137.2, 132.0, 129.9, 128.4, 127.5, 127.1, 125.7, 120.1, 119.9, 117.9, 110.0, 109.5, 107.4, 90.4, 52.3, 50.4, 36.2, 33.0, 28.9, 28.6. HRMS (ESI): calcd for  $\text{C}_{22}\text{H}_{22}\text{ClN}_3\text{ONa}$   $[\text{M} + \text{Na}]^+$ : 402.1349, Found: 402.1345.

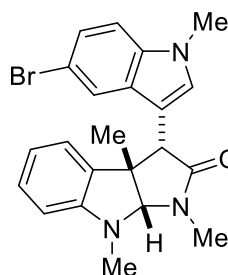

**3-(5-bromo-1-methyl-1H-indol-3-yl)-1,3a,8-trimethyl-3,3a,8,8a-tetrahydropyrrolo[2,3-b]indol-2(1H)-one (5e):** white solid (54 mg, 71% yield);  $R_f$  = 0.52 (PE:EA = 1:2);  $^1\text{H}$  NMR (500 MHz,  $\text{CDCl}_3$ )  $\delta$  7.56 (s, 1H), 7.26 – 7.24 (m, 1H), 7.14 (d,  $J$  = 8.7 Hz, 1H), 6.98 (t,  $J$  = 7.0 Hz, 1H), 6.66 (s, 1H), 6.43 (d,  $J$  = 7.8 Hz, 1H), 6.26 (t,  $J$  = 7.5 Hz, 1H), 5.75 (d,  $J$  = 8.7 Hz, 1H), 4.74 (s, 1H), 4.14 (s, 1H), 3.65 (s, 3H), 3.15 (s, 3H), 3.07 (s, 3H), 1.63 (s, 3H).  $^{13}\text{C}$  NMR (126 MHz,  $\text{CDCl}_3$ )  $\delta$  173.7, 149.7, 135.4, 132.0, 130.4, 130.2, 128.4, 125.7, 124.3, 121.6, 117.8, 112.7, 110.9, 109.4, 107.3, 90.3, 52.2, 50.3, 36.1, 33.1, 29.0, 28.6. HRMS (ESI): calcd for  $\text{C}_{22}\text{H}_{22}\text{BrN}_3\text{ONa}$   $[\text{M} + \text{Na}]^+$ : 446.0844, Found: 446.0845.

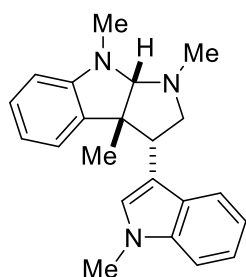

**1,3a,8-trimethyl-3-(1-methyl-1H-indol-3-yl)-1,2,3,3a,8,8a-hexahydropyrrolo[2,3-b]indole (6a):** white solid (95 mg, 72% yield);  $R_f$  = 0.43 (PE:EA = 1:2);  $^1\text{H}$  NMR (500 MHz,  $\text{CDCl}_3$ )  $\delta$  7.62 (d,  $J$  = 7.8 Hz, 1H), 7.29 (d,  $J$  = 8.1 Hz, 1H), 7.24 – 7.21 (m, 1H), 7.12 – 7.09 (m, 1H), 7.00 (td,  $J$  = 7.6, 1.3 Hz, 1H), 6.46 (d,  $J$  = 7.7 Hz, 1H), 6.26 – 6.23 (m, 2H), 5.76 (dd,  $J$  = 7.3, 1.3 Hz, 1H), 4.48 (s, 1H), 3.85 – 3.81 (m, 1H), 3.62 (s, 3H), 3.02 – 3.00 (m, 1H), 2.99 (s, 3H), 2.85 – 2.80 (m, 1H), 2.64 (s, 3H), 1.64 (s, 3H).  $^{13}\text{C}$  NMR (126 MHz,  $\text{CDCl}_3$ )  $\delta$  153.5, 136.6, 133.1, 128.8, 127.6, 127.6, 125.5, 121.3, 119.4, 118.9, 116.1, 111.9, 109.2, 106.5, 98.1, 58.2, 57.4, 47.9, 38.3, 37.2, 32.7, 28.8. HRMS (ESI): calcd for  $\text{C}_{22}\text{H}_{25}\text{N}_3\text{Na}$   $[\text{M} + \text{Na}]^+$ : 354.1946, Found: 354.1950.

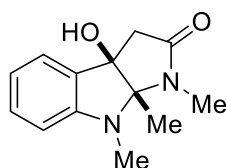

**3a-hydroxy-1,8,8a-trimethyl-3,3a,8,8a-tetrahydropyrrolo[2,3-b]indol-2(1H)-one (7)<sup>[1]</sup>:** white solid (18 mg, 38% yield)  $R_f$  = 0.44 (PE:EA = 1:2);  $^1\text{H}$  NMR (500 MHz,  $\text{CDCl}_3$ )  $\delta$  7.31 (dd,  $J$  = 7.5, 1.3 Hz, 1H), 7.27 – 7.23 (m, 1H), 6.78 (t,  $J$  = 7.4 Hz, 1H), 6.48 (d,  $J$  = 7.9 Hz, 1H), 3.01 (d,  $J$  = 7.3 Hz, 4H), 2.88 (d,  $J$  = 16.8 Hz, 1H), 2.80 (s, 3H), 1.98 (s, 1H), 1.56 (s, 3H).  $^{13}\text{C}$  NMR (126 MHz,  $\text{CDCl}_3$ )  $\delta$  170.4, 149.1, 131.2, 130.2, 124.3, 118.7, 107.2, 89.1, 81.4, 41.7, 30.1, 26.1, 15.2.

## 5. References

- [1] Wu, K.; Du, Y.; Wei, Z. et al. Synthesis of functionalized pyrroloindolines via a visible-light-induced radical cascade reaction: rapid synthesis of ( $\pm$ )-flustraminol B. *Chem. Commun.* **2018**, *54*, 7443.
- [2] Banjare, S. K.; Nanda, T. et al. Cobalt-catalyzed regioselective direct C-4 alkenylation of 3-acetylindole with Michael acceptors using a weakly coordinating functional group. *Org. Lett.* **2019**, *21*, 8138.
- [3] Cheng, H. G.; Lu, L. Q.; Wang, T. et al. Highly enantioselective Friedel-Crafts alkylation/N-hemiacetalization cascade reaction with indoles. *Angew. Chem. Int. Ed.* **2013**, *52*, 3250.
- [4] Nandi, R. K.; Perez-Luna, A.; Gori, D. et al. Triflic acid as an efficient Brønsted acid promoter for the umpolung of *N*-Ac indoles in hydroarylation reactions. *Adv. Synth. Catal.* **2018**, *360*, 161.
- [5] Cheng, X.; Wang, L.; Liu, Y. et al. Molecular iodine-catalysed reductive alkylation of indoles: late-stage diversification for bioactive molecules. *Eur. J. Org. Chem.* **2022**, *2022*, e202200502.
- [6] Leeson, P. D. A synthetic route to dehydrosecodine analogues. *J. Chem. Soc., Perkin Trans. 1* **1984**, 2125.
- [7] Jayaprakash, S. H.; Krishna, B. S.; Prasad, S. S. et al. Sodium perborate: a facile catalyst for allylation of active centers. *Synth. Commun.* **2015**, *45*, 355.
- [8] Do, Q. T.; Nguyen, G. T.; Celis, V. et al. Inhibition of *Escherichia coli* tryptophan indole-lyase by tryptophan homologues. *Arch. Biochem. Biophys.* **2014**, *560*, 20.
- [9] Méndez-Rojas, C.; Quiroz, G.; Faúndez, M. et al. Synthesis and biological evaluation of potential acetylcholinesterase inhibitors based on a benzoxazine core. *Arch. Pharm.* **2018**, *351*, 1800024.
- [10] Li, Y. L.; Pang, J. Y.; Lou, J. C. et al. Chemo- and site-selective Fischer esterification catalyzed by  $B(C_6F_5)_3$ . *Asian J. Org. Chem.* **2021**, *10*, 1424.
- [11] Masafumi, K.; Atsuyuki, K.; Kazuhiro, N. et al. Synthesis and biological activity of *N*-(aminoiminomethyl)-1*H*-indole carboxamide derivatives as  $Na^+/H^+$  exchanger inhibitors. *Chem. Pharm. Bull.* **1999**, *47*, 1538.
- [12] Ojeda-Gómez, C.; Pessoa-Mahana, H.; Iturriaga-Vásquez, P. et al. Synthesis and biological screening of novel indolalkyl arenes targeting the serotonin transporter. *Arch. Pharm.* **2014**, *347*, 174.
- [13] Guney, T.; Lee, J. J.; Kraus, G. A. First inverse electron-demand Diels–Alder methodology of 3-chloroindoles and methyl coumalate to carbazoles. *Org. Lett.* **2014**, *16*, 1124.

## 6. NMR spectra of products

### *N*-(2,4-dinitrophenoxy)-2-(6-fluoro-1-methyl-1*H*-indol-3-yl)-*N*-methylacetamide(**1c**):

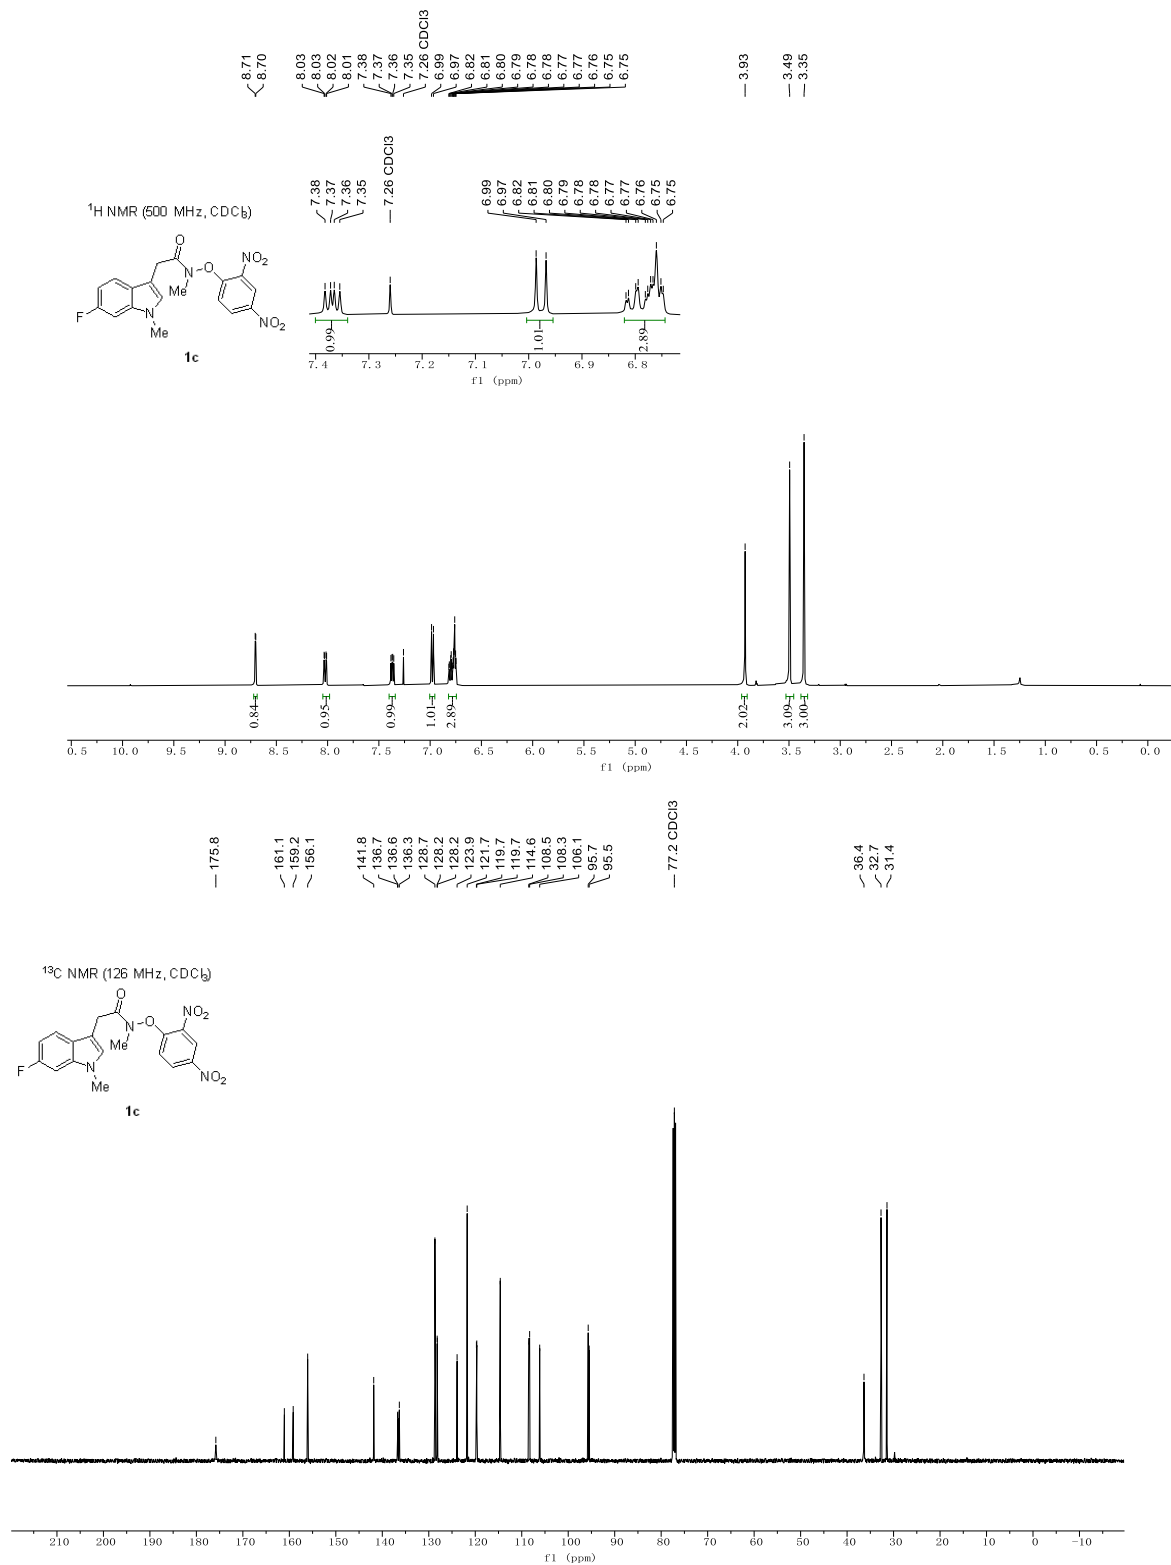

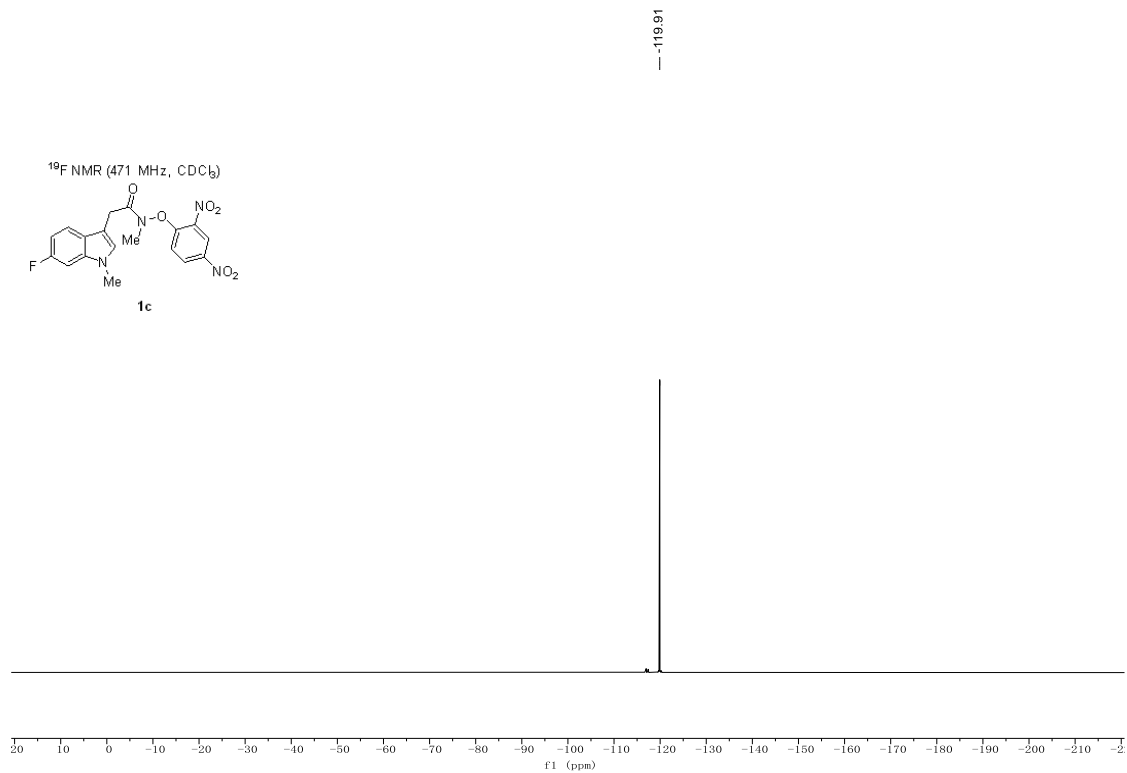

**2-(6-chloro-1-methyl-1H-indol-3-yl)-N-(2,4-dinitrophenoxy)-N-methylacetamide (1d):**

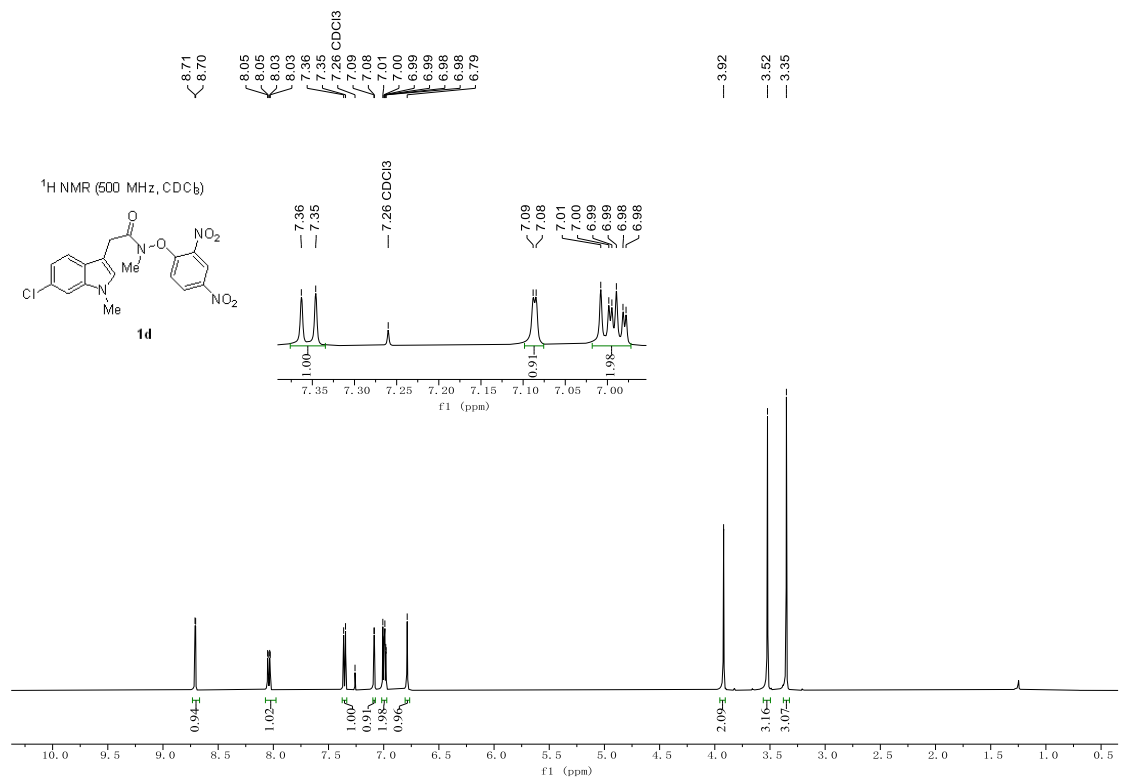



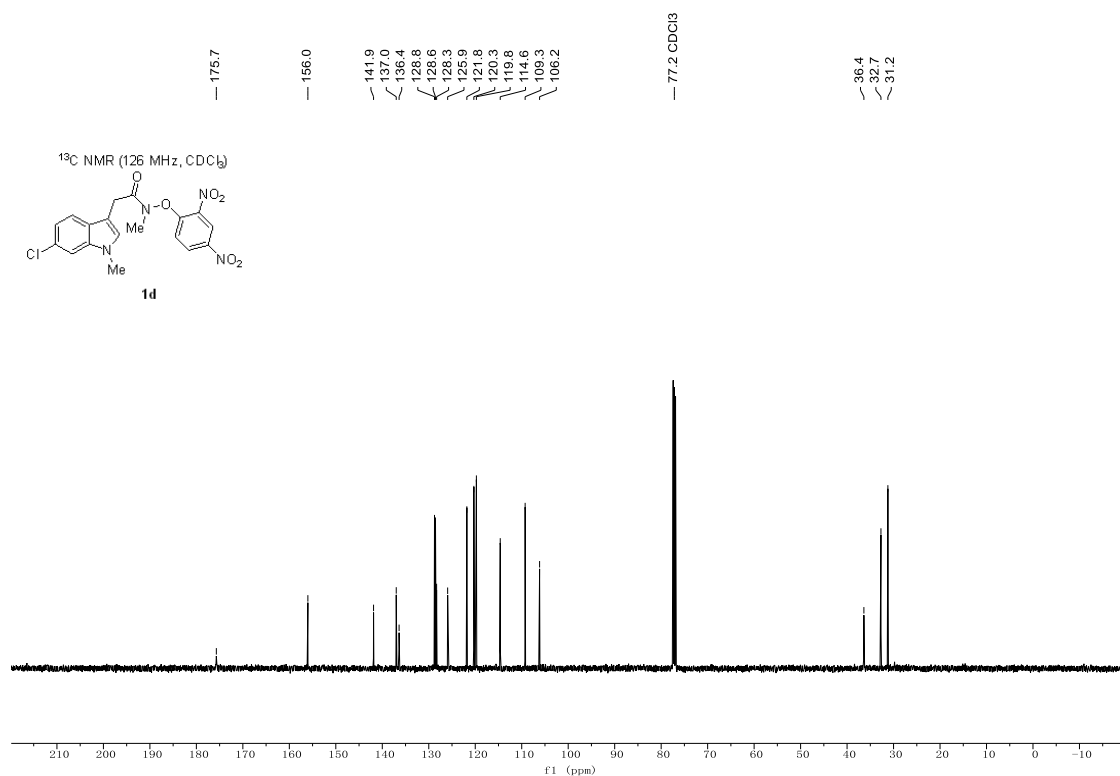

**1,3a,8-trimethyl-3-(1-methyl-1H-indol-3-yl)-3,3a,8,8a-tetrahydropyrrolo[2,3-b]indol-2(1H)-one (3a):**

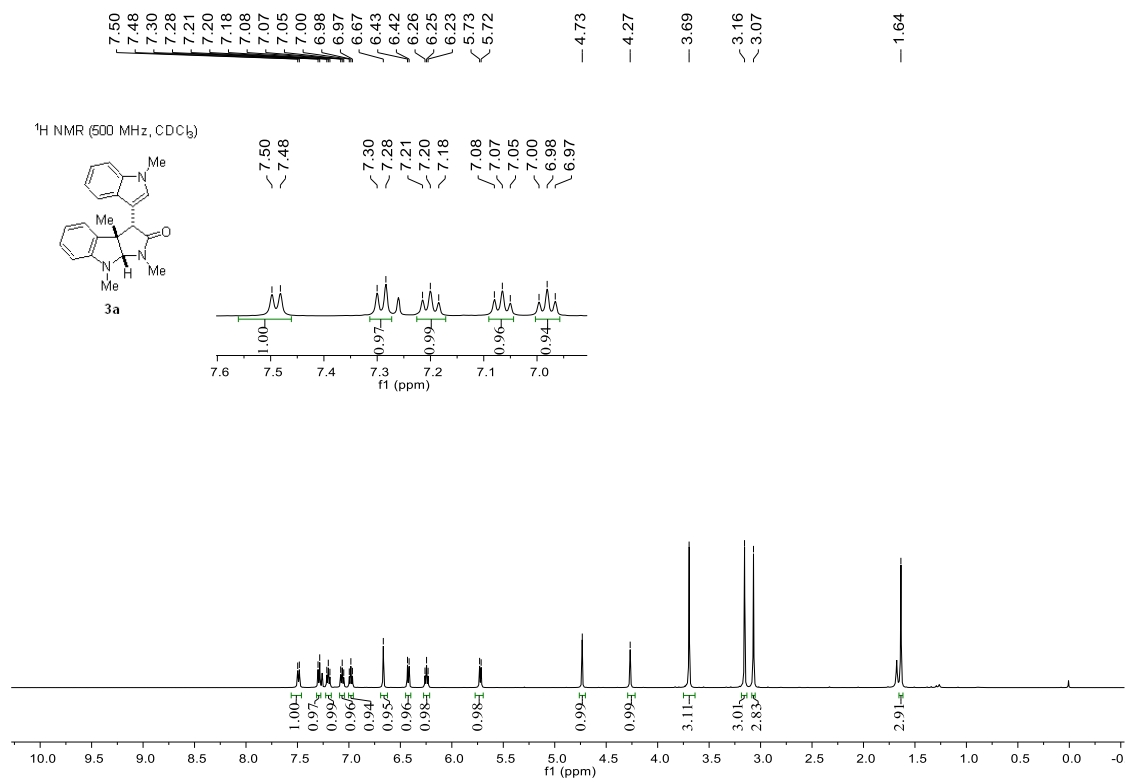

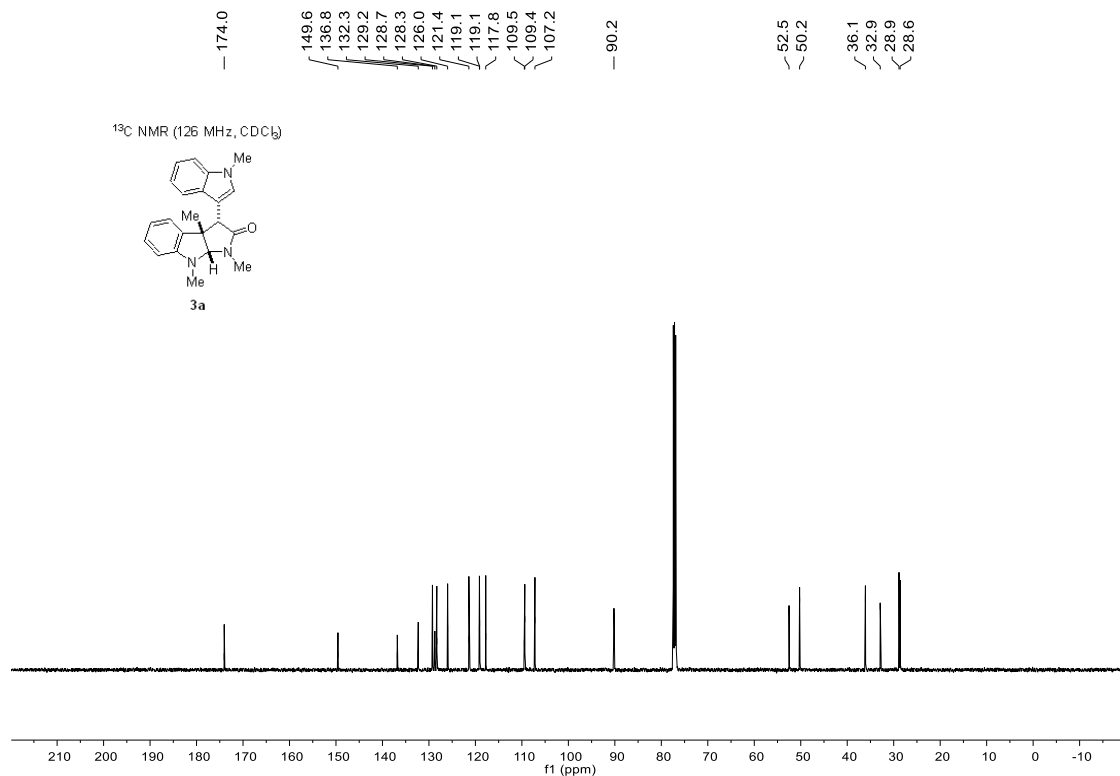

**2-(1,3-dimethyl-1*H*-indol-2-yl)-*N*-methyl-2-(1-methyl-1*H*-indol-3-yl)acetamide (3a')**

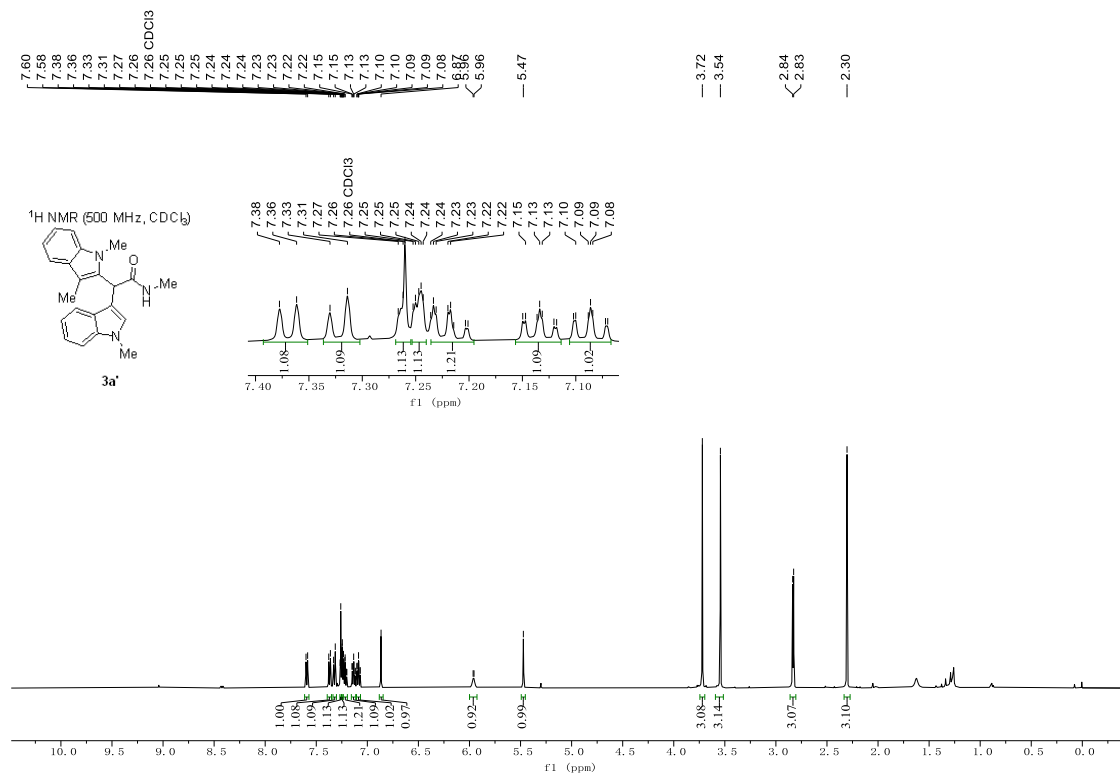

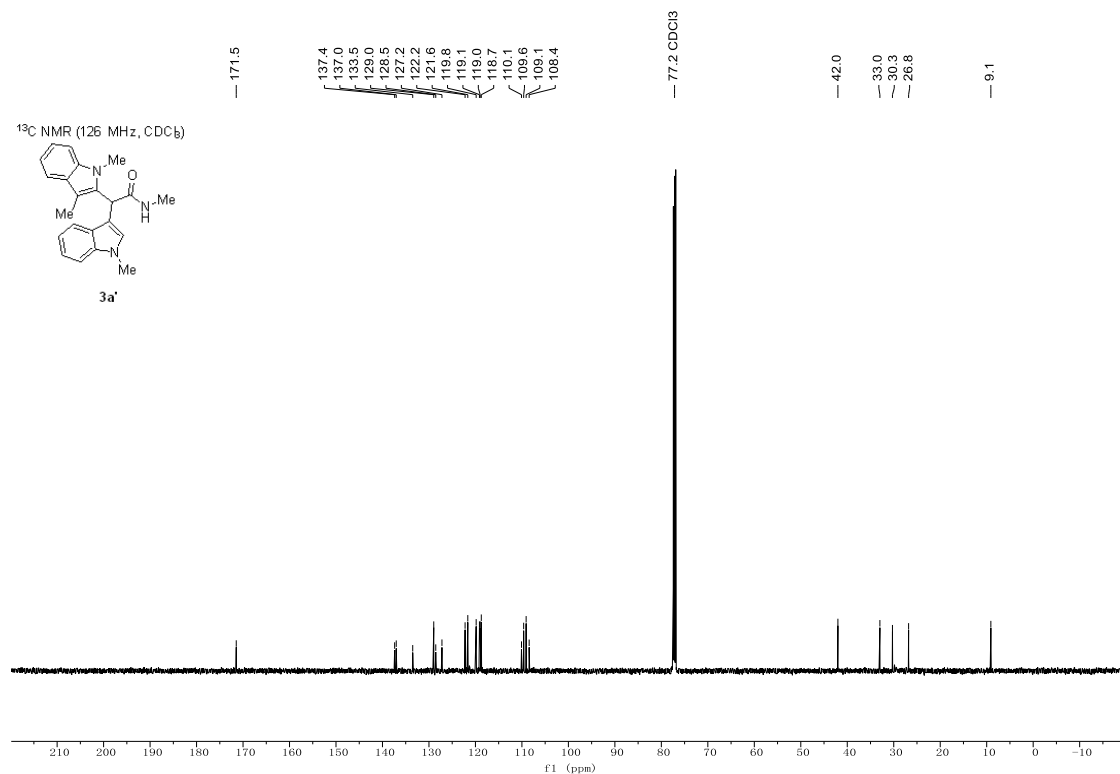

**1,3a,6,8-tetramethyl-3-(1-methyl-1*H*-indol-3-yl)-3,3a,8,8a-tetrahydropyrrolo[2,3-*b*]indol-2(1*H*)-one(3b):**

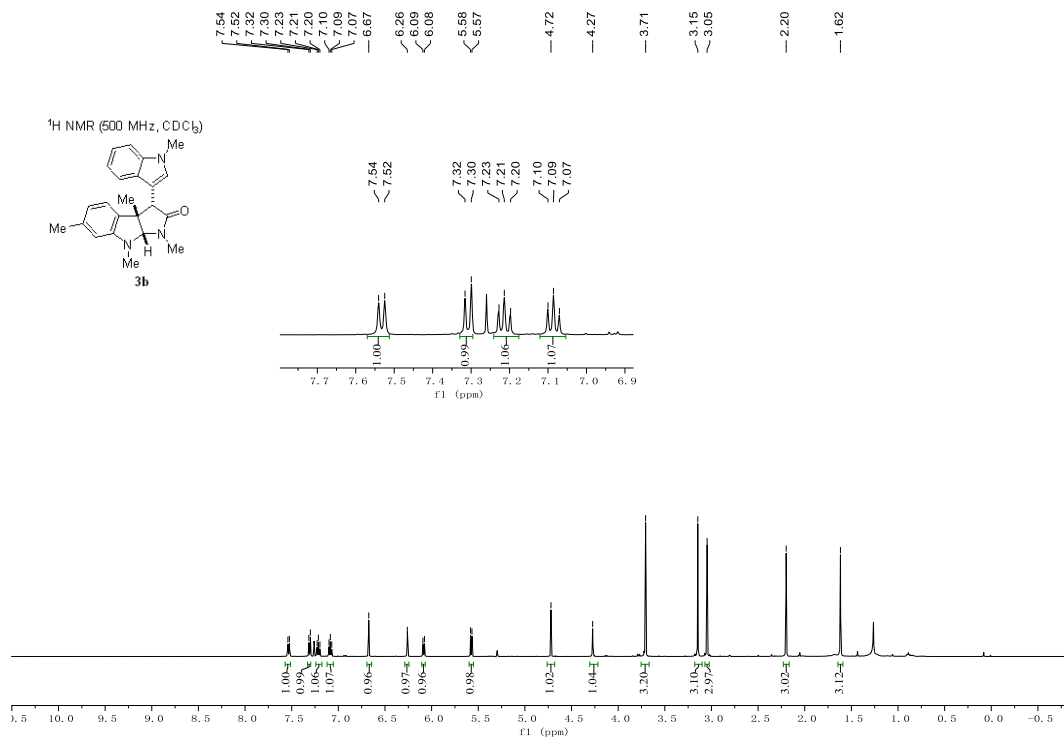

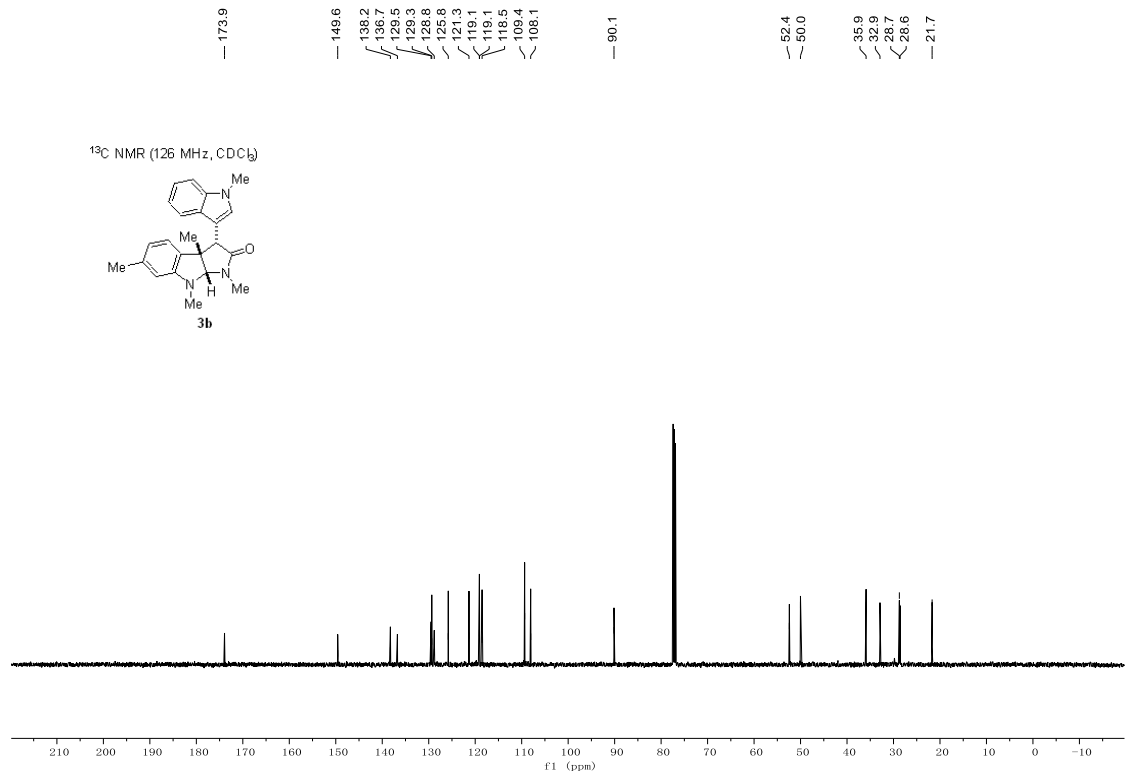

*N*-methyl-2-(1-methyl-1*H*-indol-3-yl)-2-(1,3,6-trimethyl-1*H*-indol-2-yl)acetamide (**3b'**):

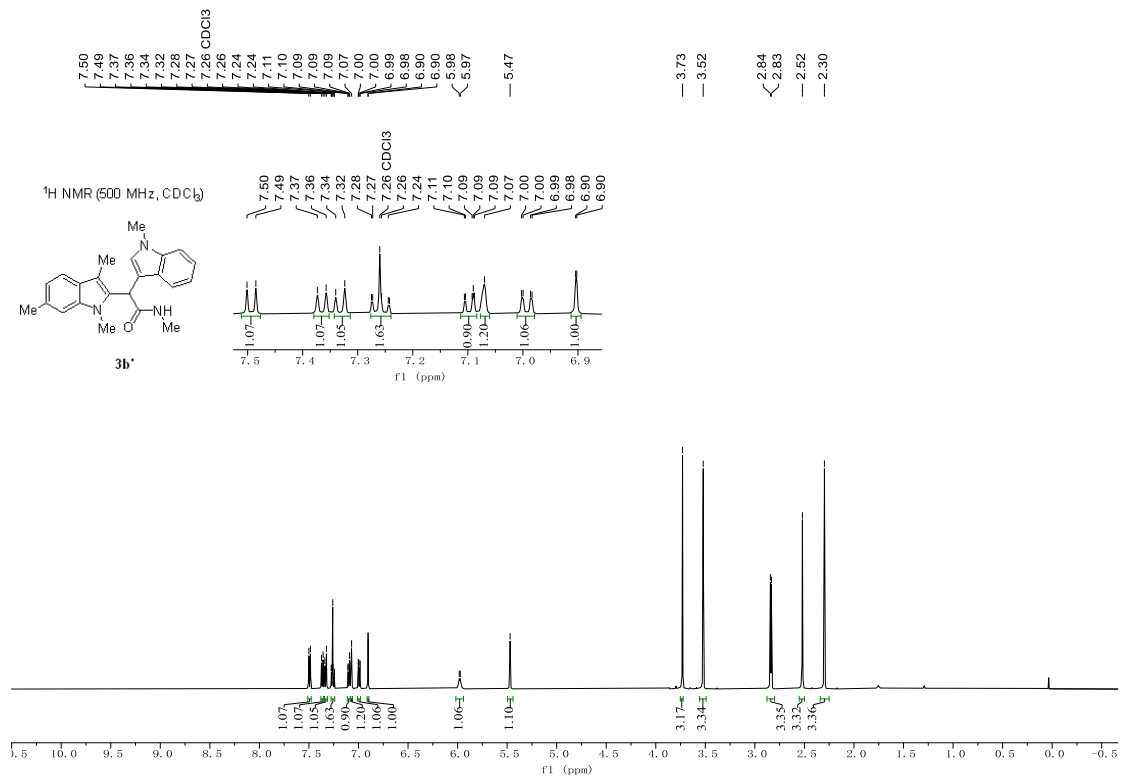

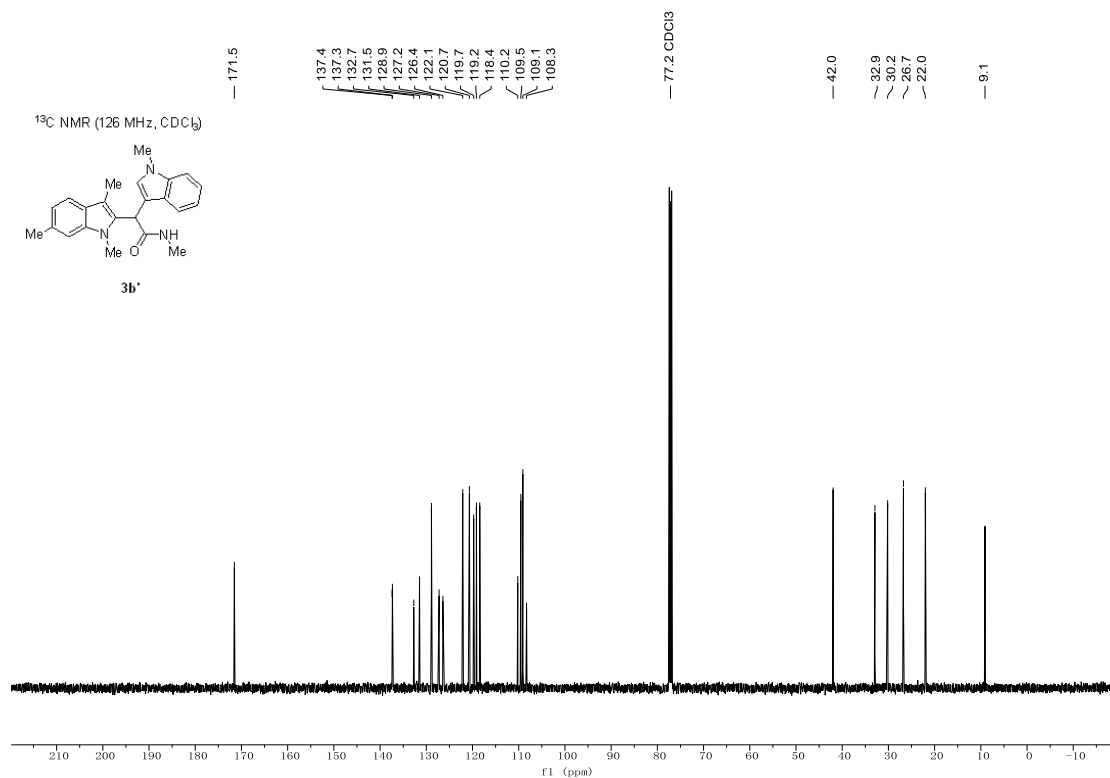

**6-fluoro-1,3a,8-trimethyl-3-(1-methyl-1*H*-indol-3-yl)-3,3a,8,8a-tetrahydropyrrolo[2,3-*b*]indol-2(1*H*)-one (3c):**

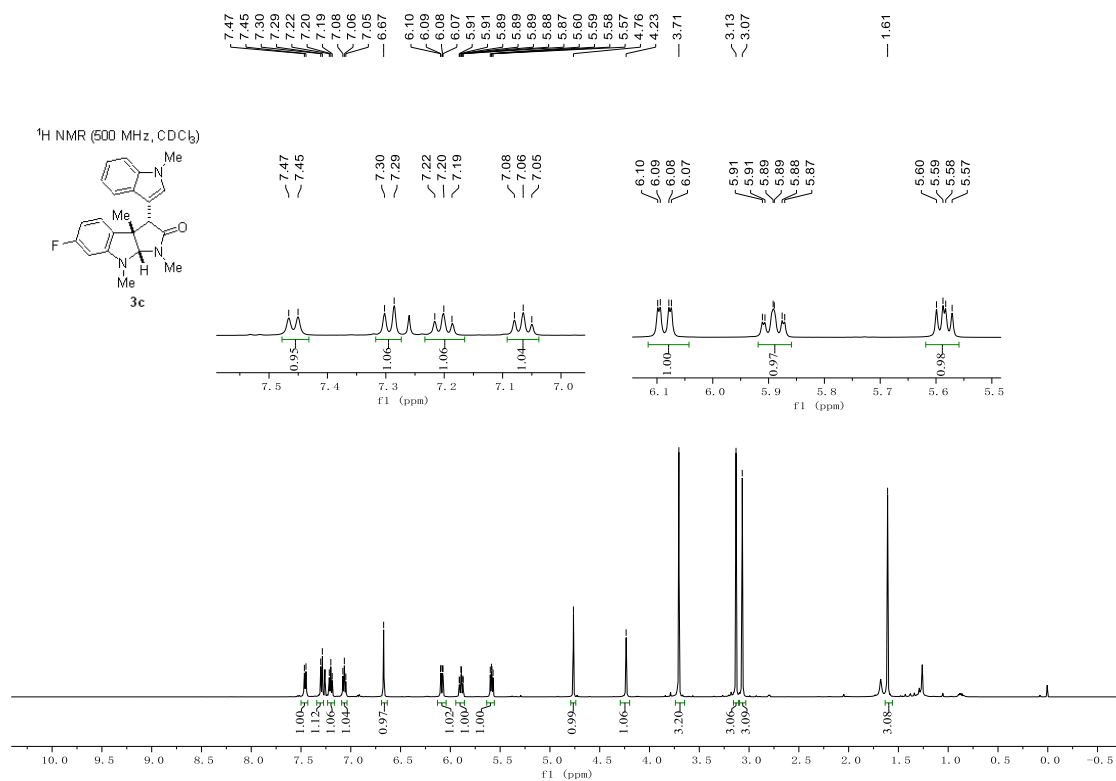

174.0  
165.0  
163.0  
151.0  
151.0  
136.8  
129.2  
128.6  
127.6  
127.5  
126.6  
126.5  
121.5  
119.3  
109.5  
109.3  
103.7  
103.5  
84.9  
84.7  
80.4  
51.9  
50.2  
35.5  
32.9  
28.0  
28.5

<sup>13</sup>C NMR (126 MHz, CDCl<sub>3</sub>)

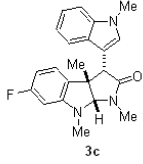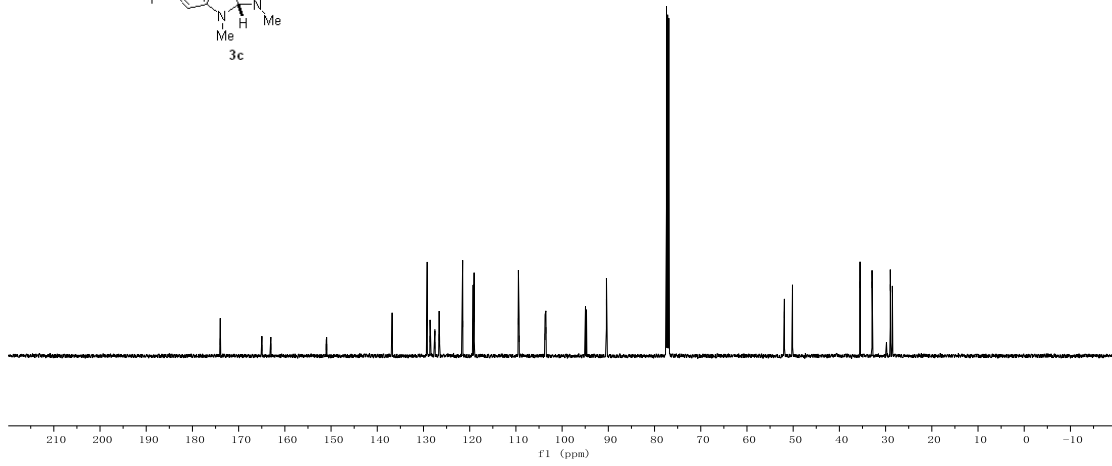

-114.4

<sup>19</sup>F NMR (471 MHz, CDCl<sub>3</sub>)

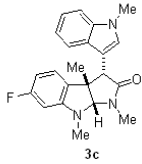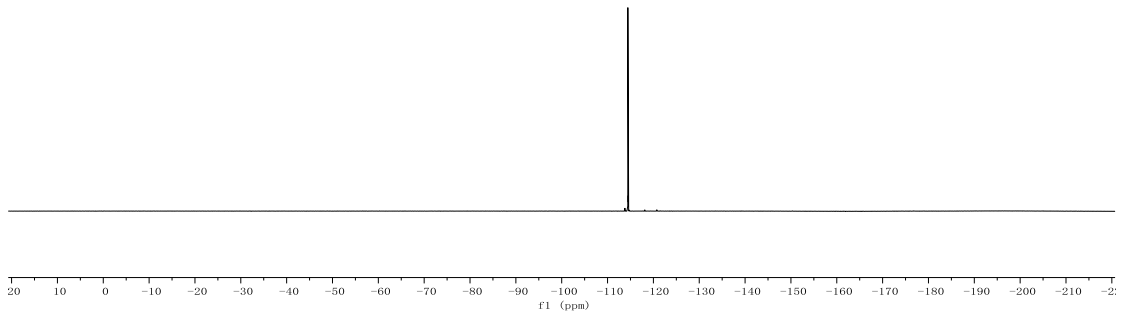

**1,3a,8-trimethyl-3-(1-methyl-1*H*-indol-3-yl)-6-(trifluoromethyl)-3,3a,8,8a-tetrahydropyrrolo[2,3-*b*]indol-2(1*H*)-one(3d):**

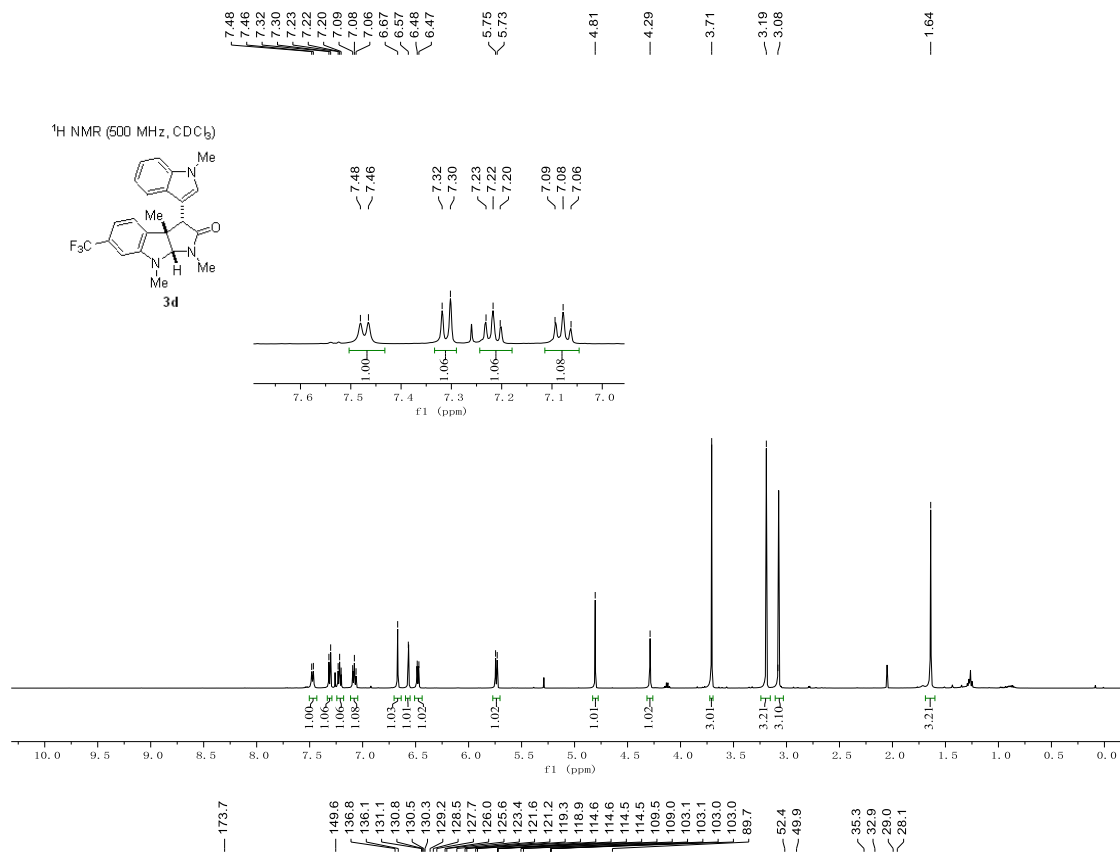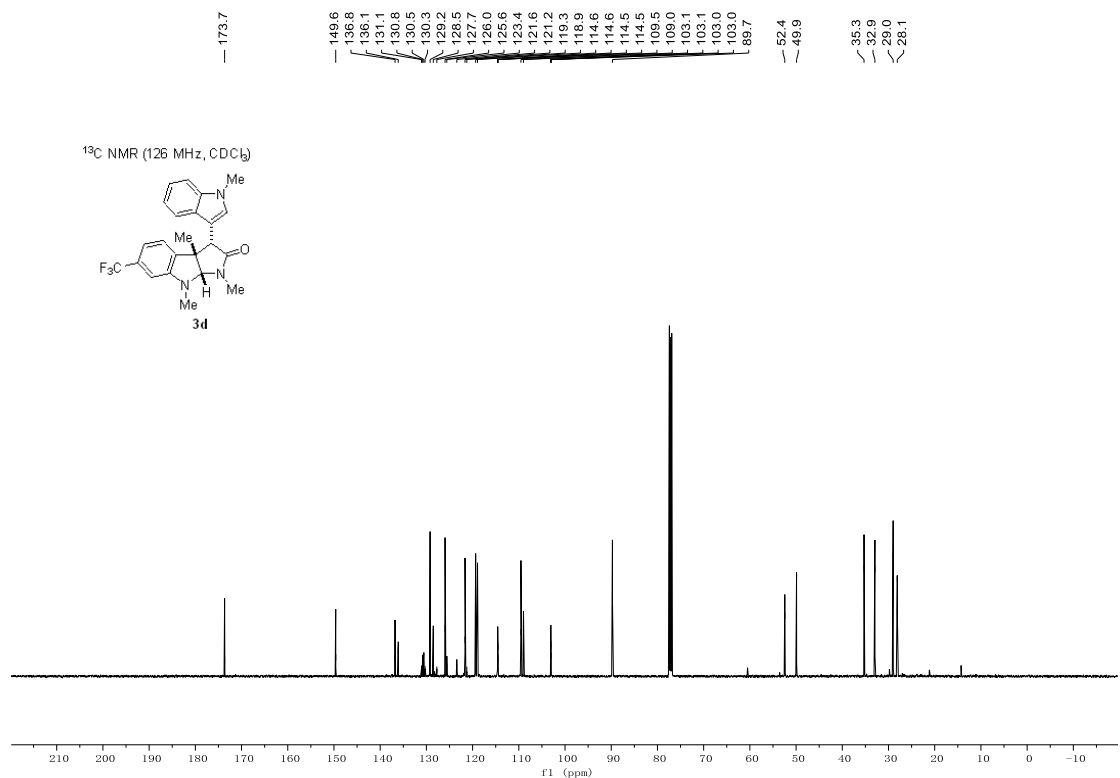

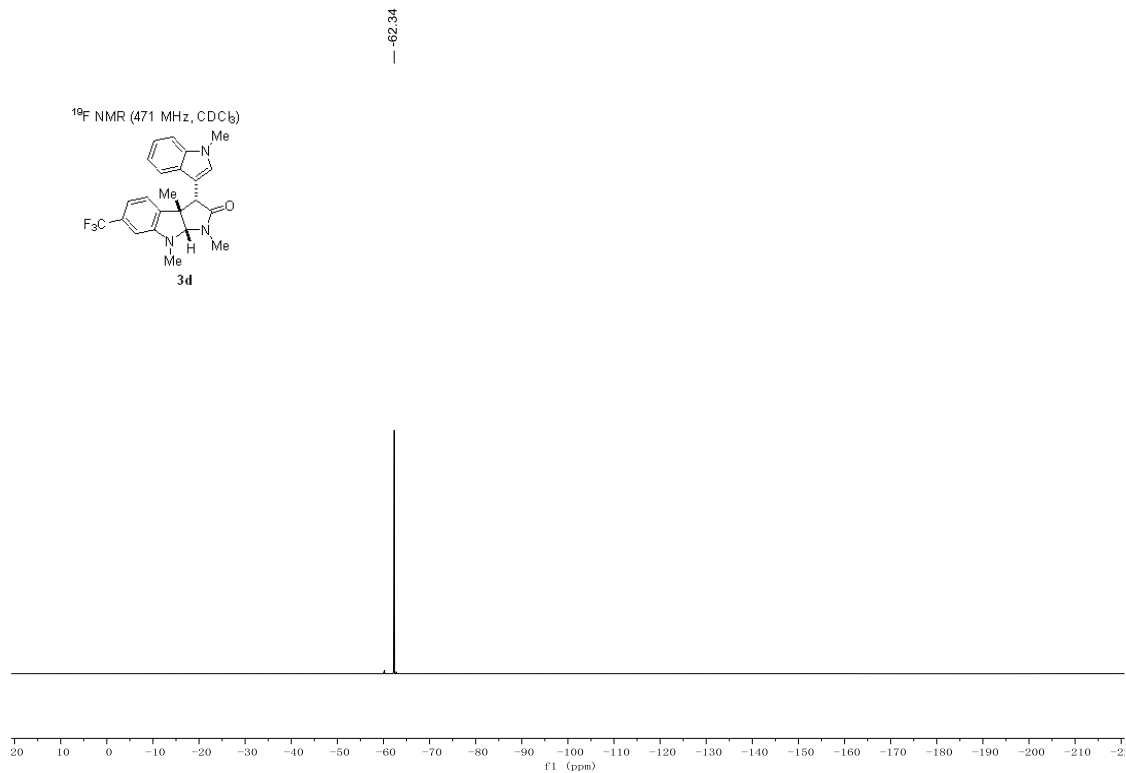

**5-chloro-1,3a,8-trimethyl-3-(1-methyl-1*H*-indol-3-yl)-3,3a,8,8a-tetrahydropyrrolo[2,3-*b*]indol-2(1*H*)-one (3e):**

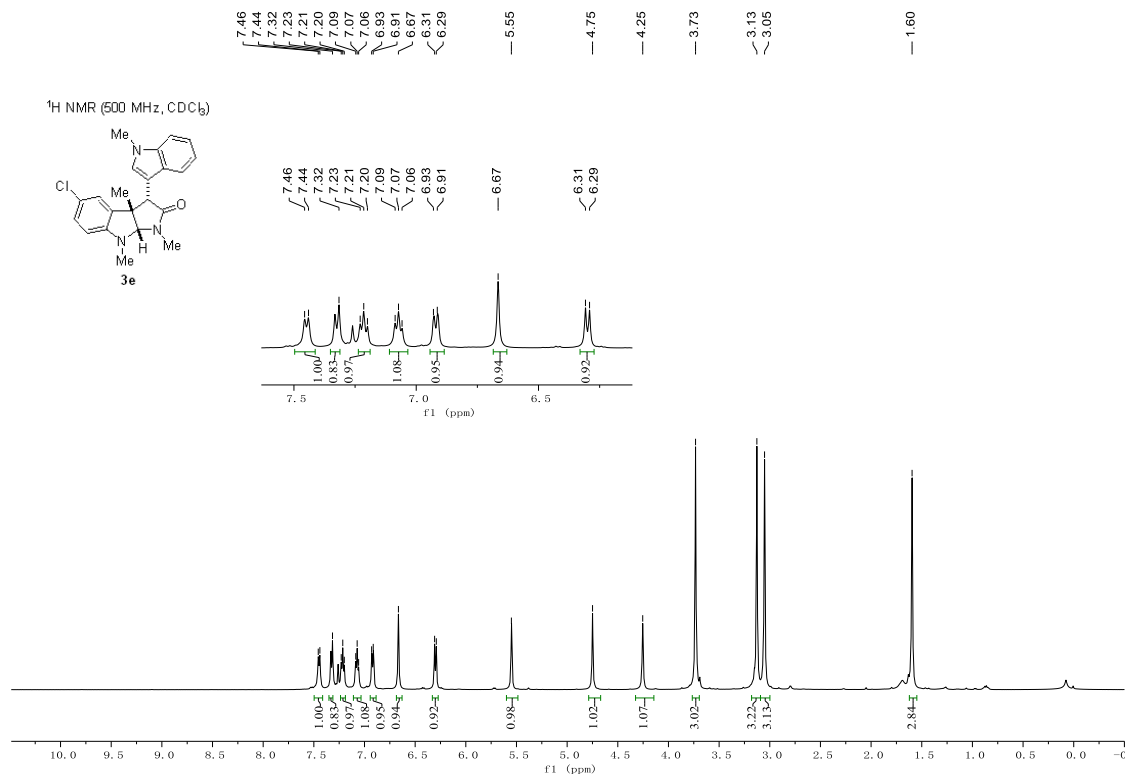



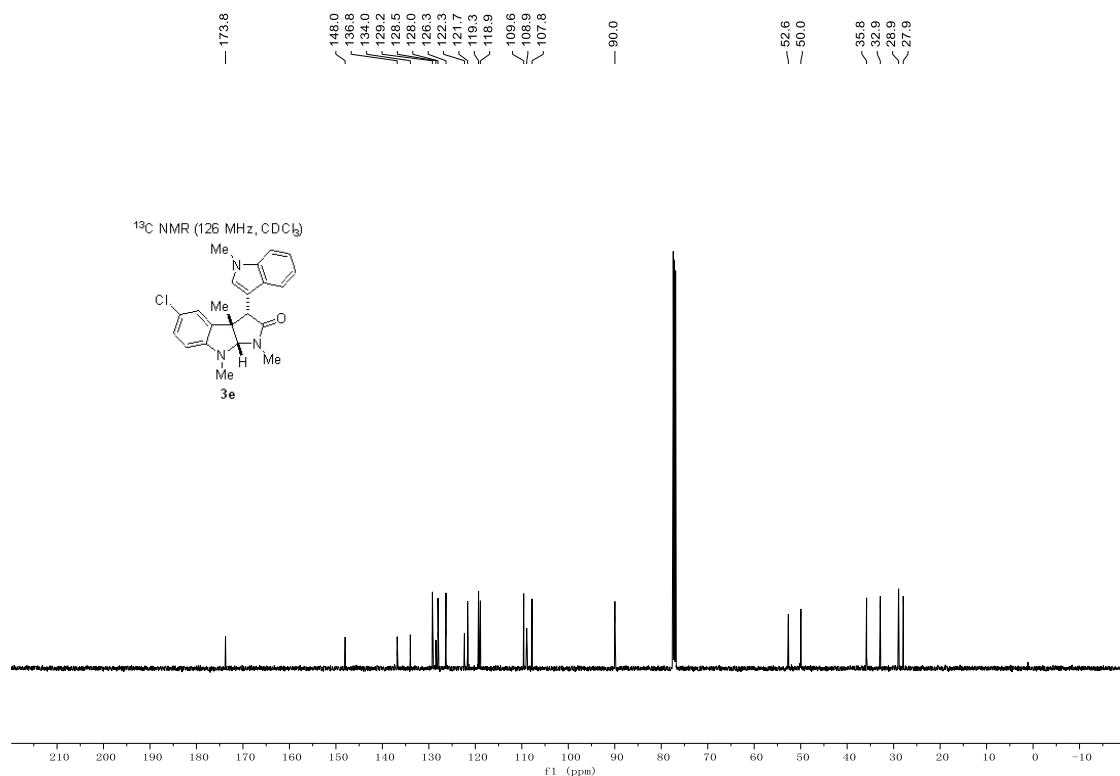

**5-bromo-1,3a,8-trimethyl-3-(1-methyl-1H-indol-3-yl)-3,3a,8,8a-tetrahydropyrrolo[2,3-b]indol-2(1H)-one(3f):**

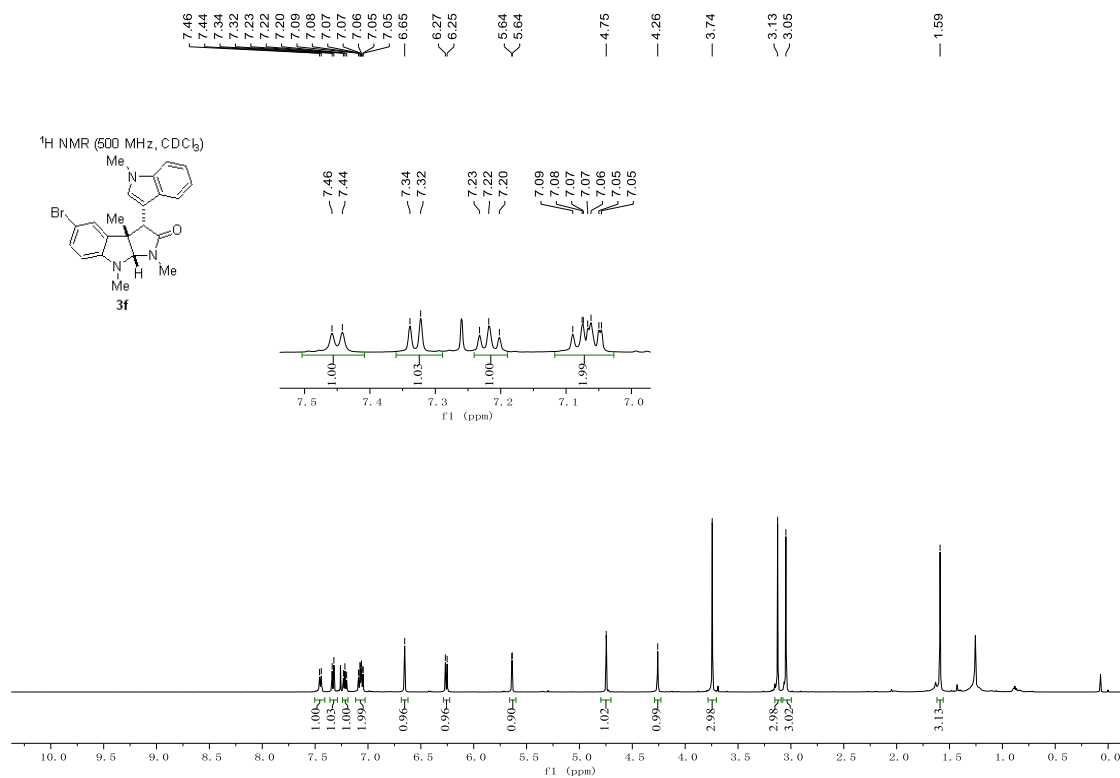

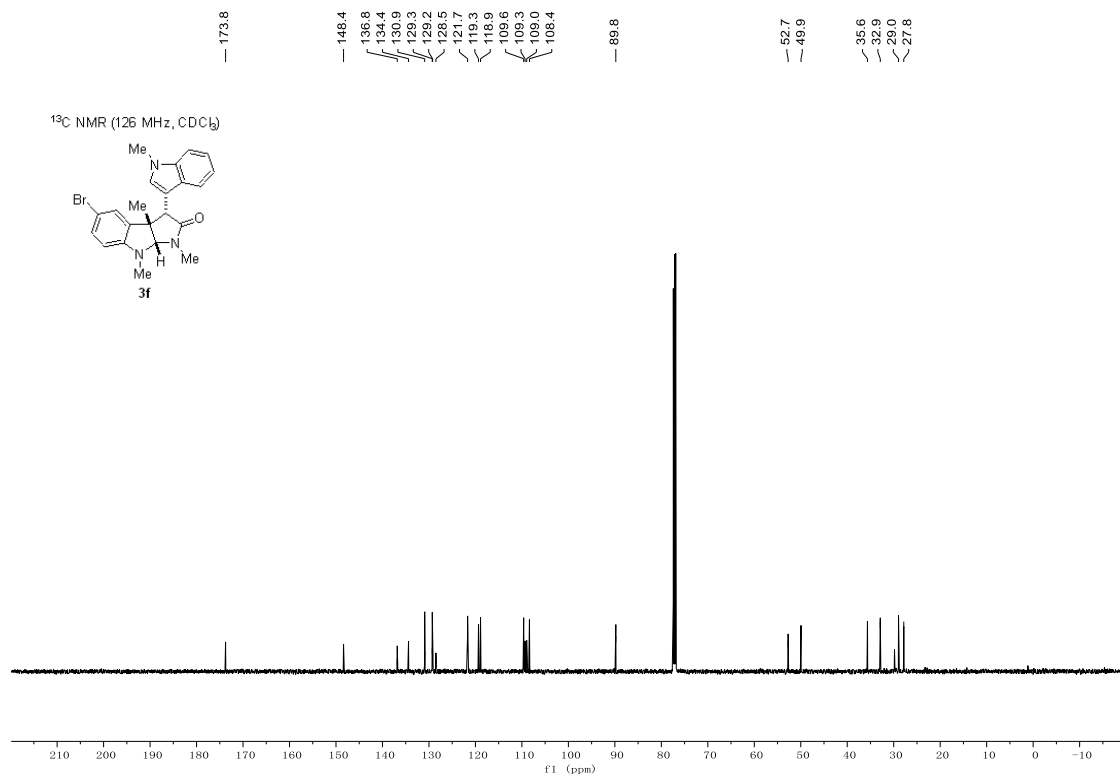

**7-bromo-1,3a,8-trimethyl-3-(1-methyl-1H-indol-3-yl)-3,3a,8,8a-tetrahydropyrrolo[2,3-b]indol-2(1H)-one (3g):**

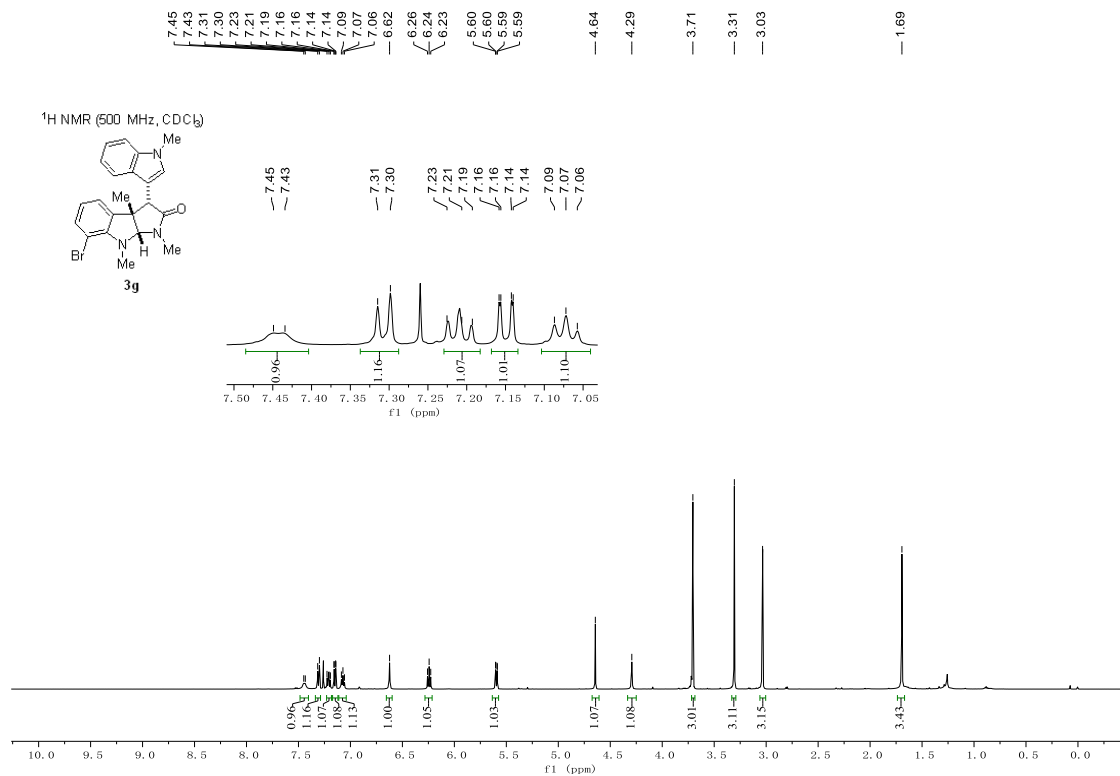

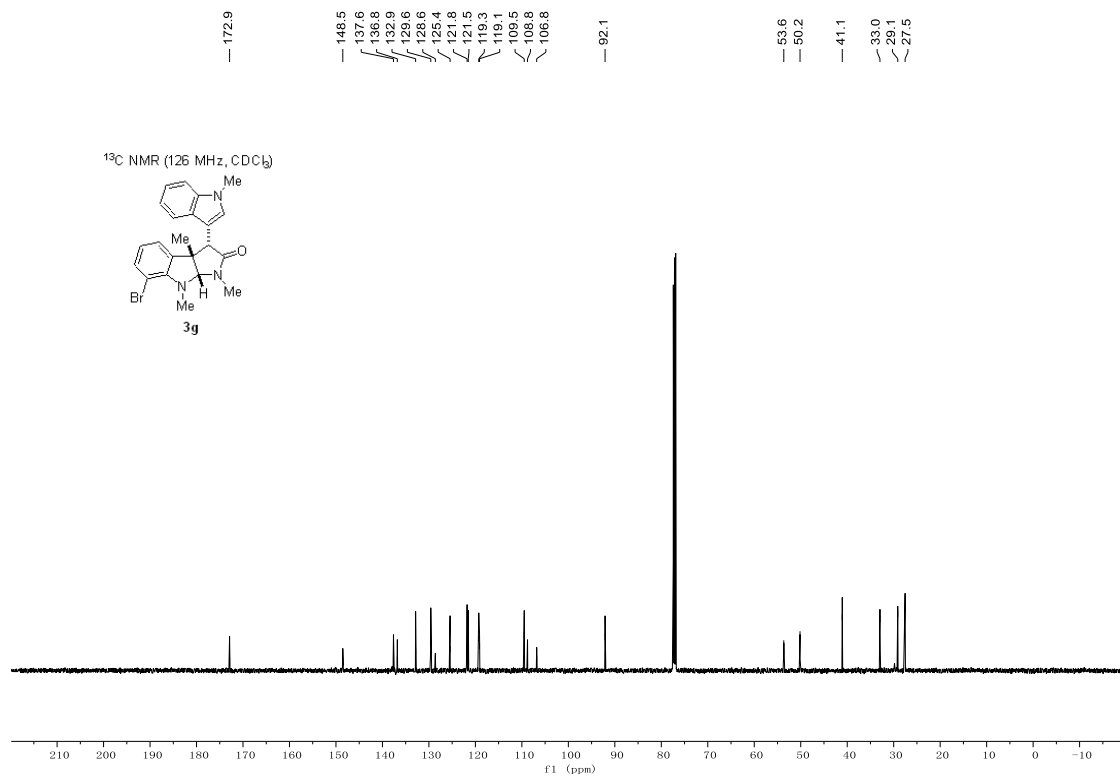

**1,3a,5,8-tetramethyl-3-(1-methyl-1*H*-indol-3-yl)-3,3a,8,8a-tetrahydropyrrolo[2,3-*b*]indol-2(1*H*)-one(3h):**

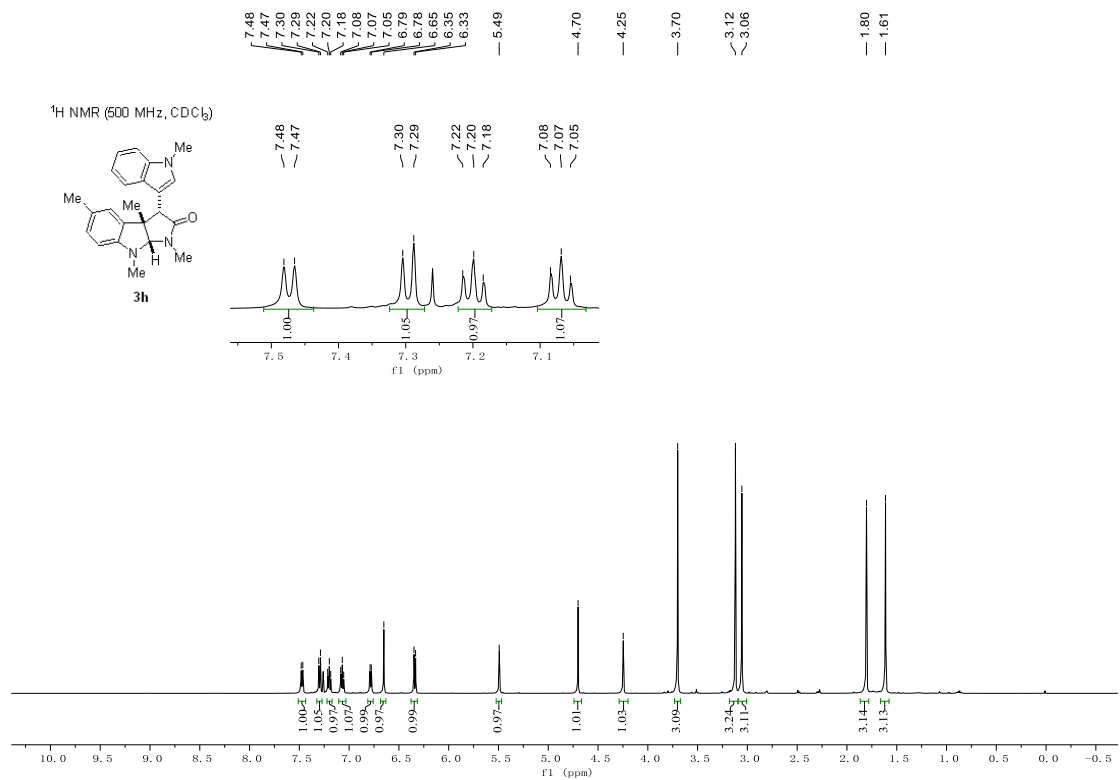

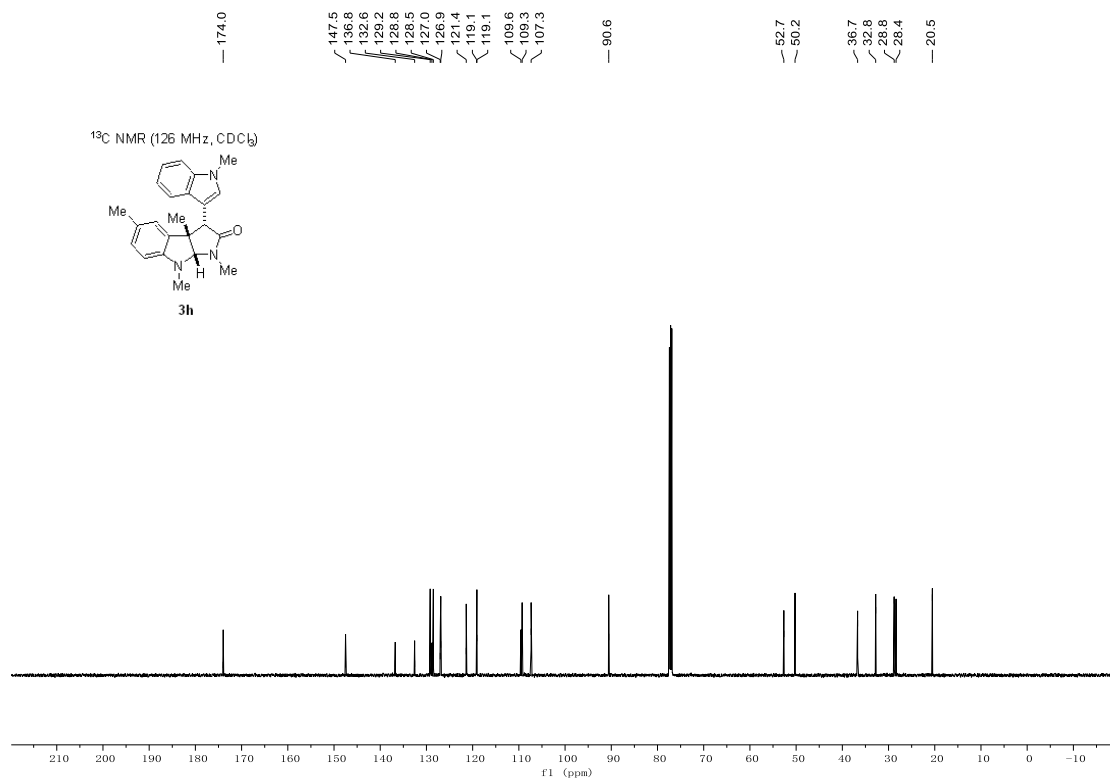

***N*-methyl-2-(1-methyl-1*H*-indol-3-yl)-2-(1,3,5-trimethyl-1*H*-indol-2-yl)acetamide(**3h'**):**

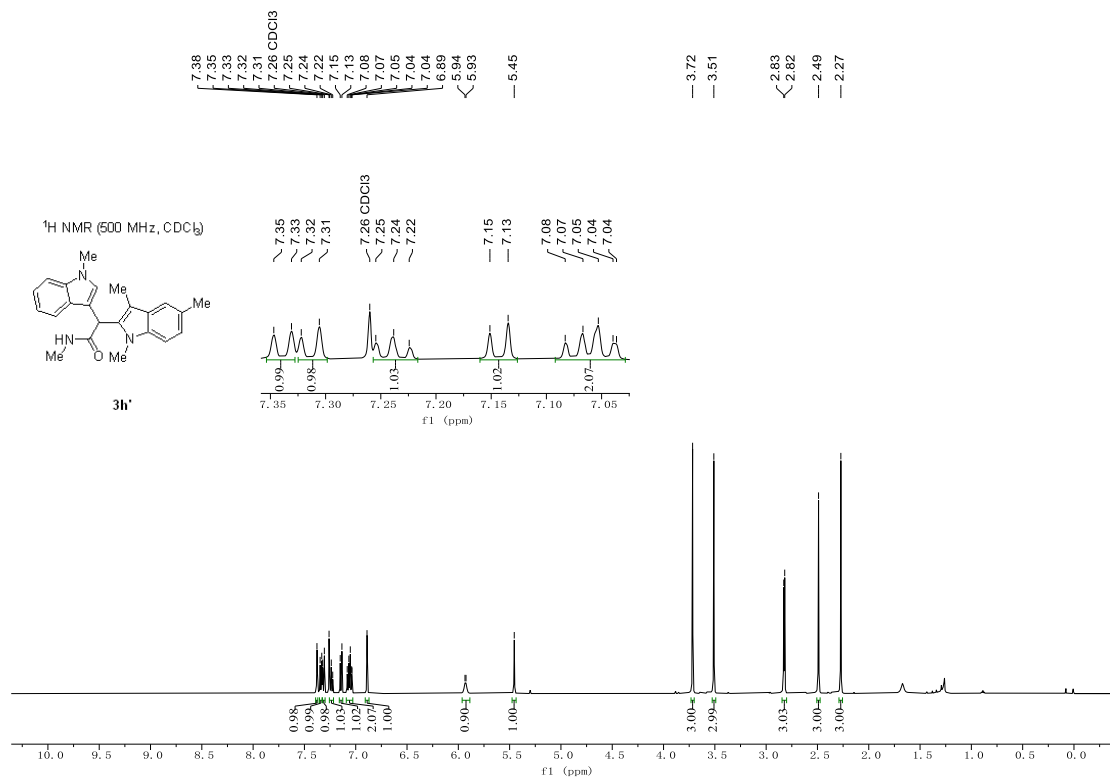

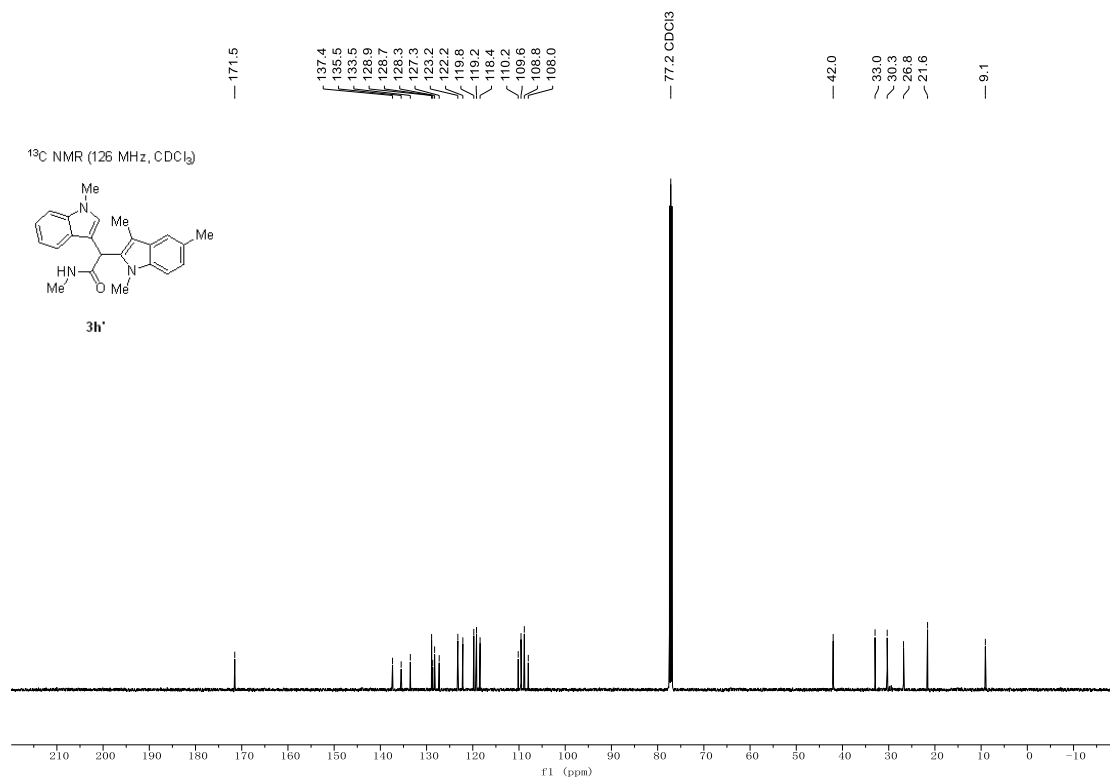

***N*-methyl-2-(1-methyl-1*H*-indol-3-yl)-2-(1,3,4-trimethyl-1*H*-indol-2-yl)acetamide (**3i'**):**

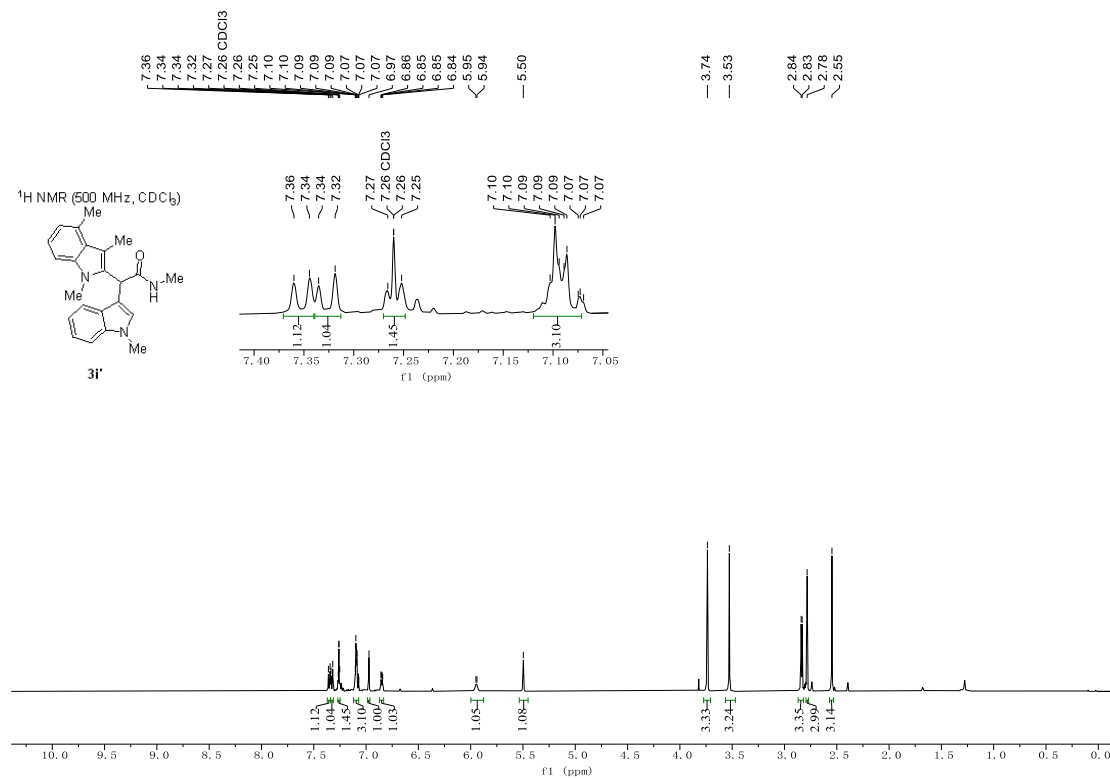

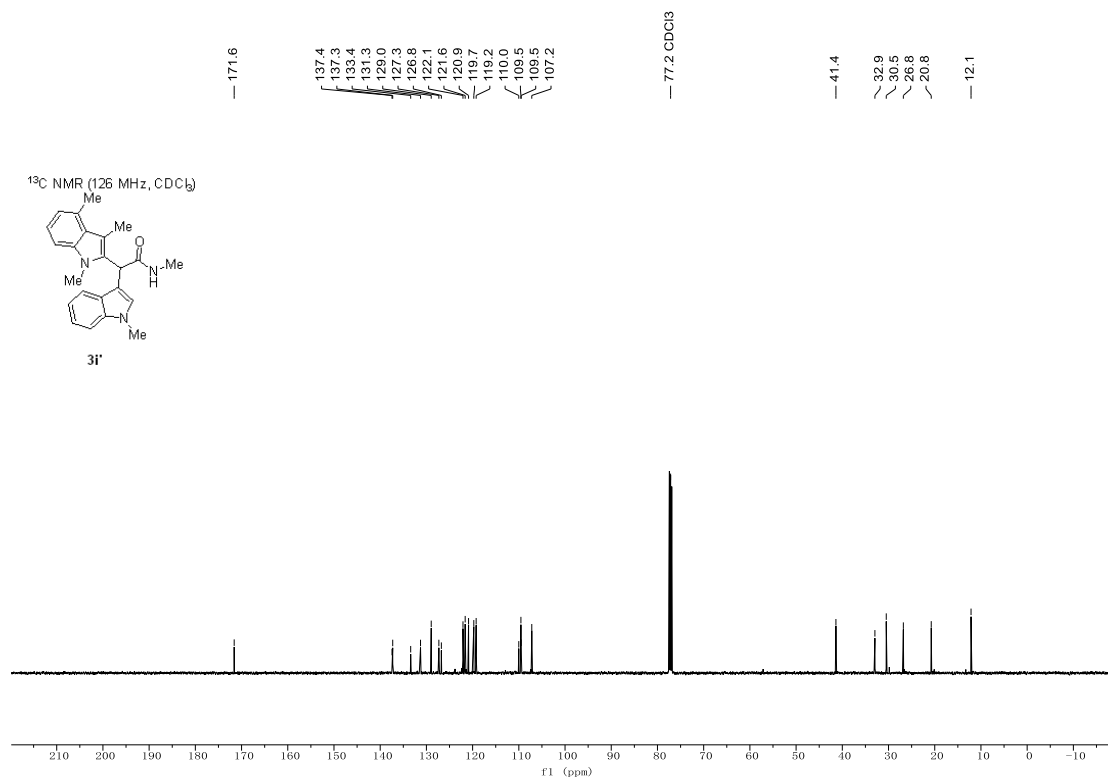

**2-(5,7-dimethyl-5H-[1,3]dioxolo[4,5-f]indol-6-yl)-N-methyl-2-(1-methyl-1H-indol-3-yl)acetamide(3j')**:

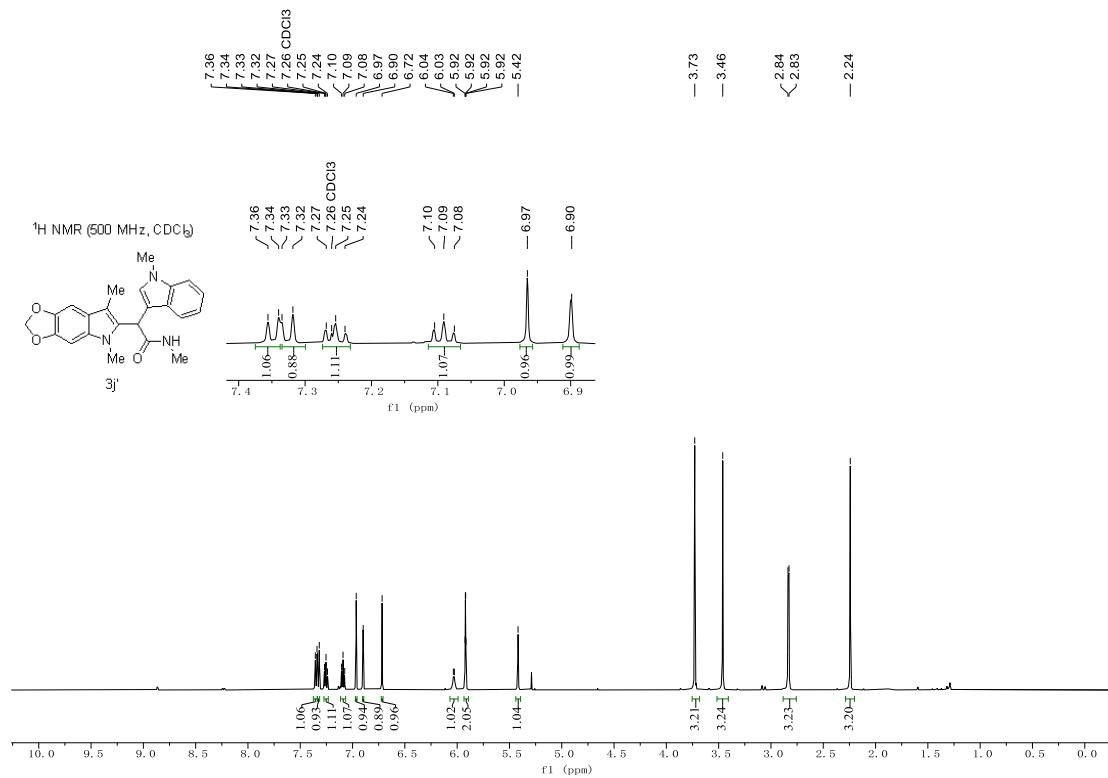

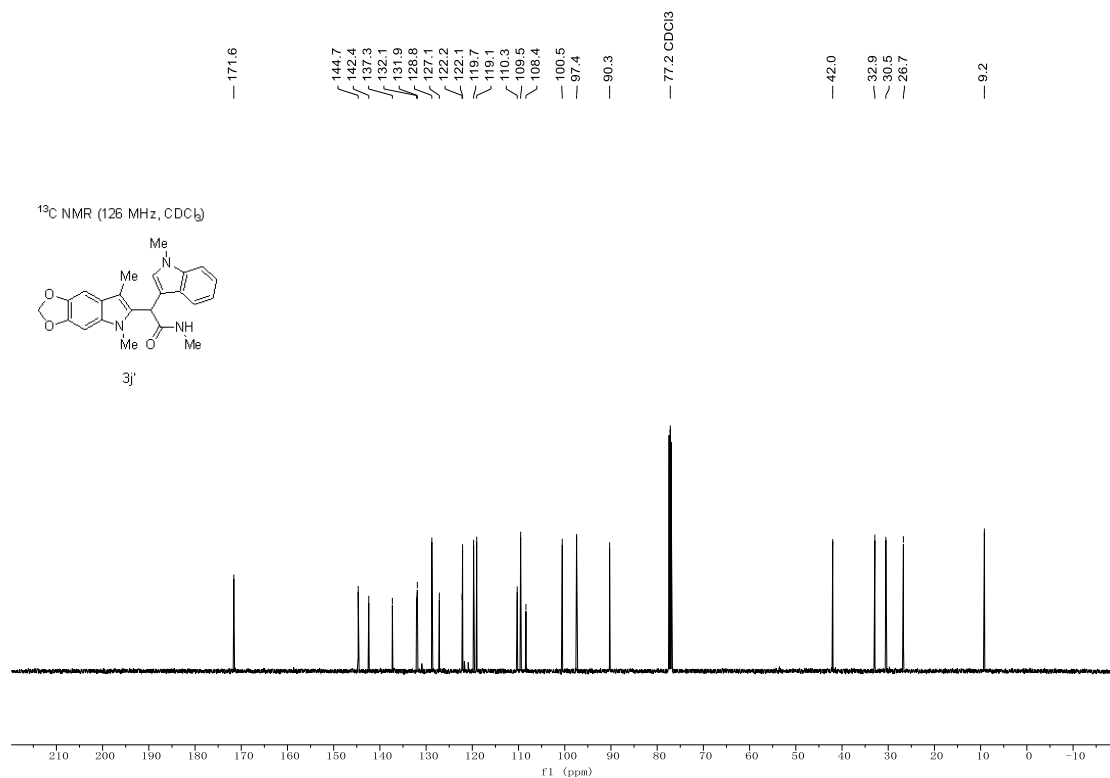

**2-(5-methoxy-1,3-dimethyl-1H-indol-2-yl)-N-methyl-2-(1-methyl-1H-indol-3-yl)acetamide(3k'):**

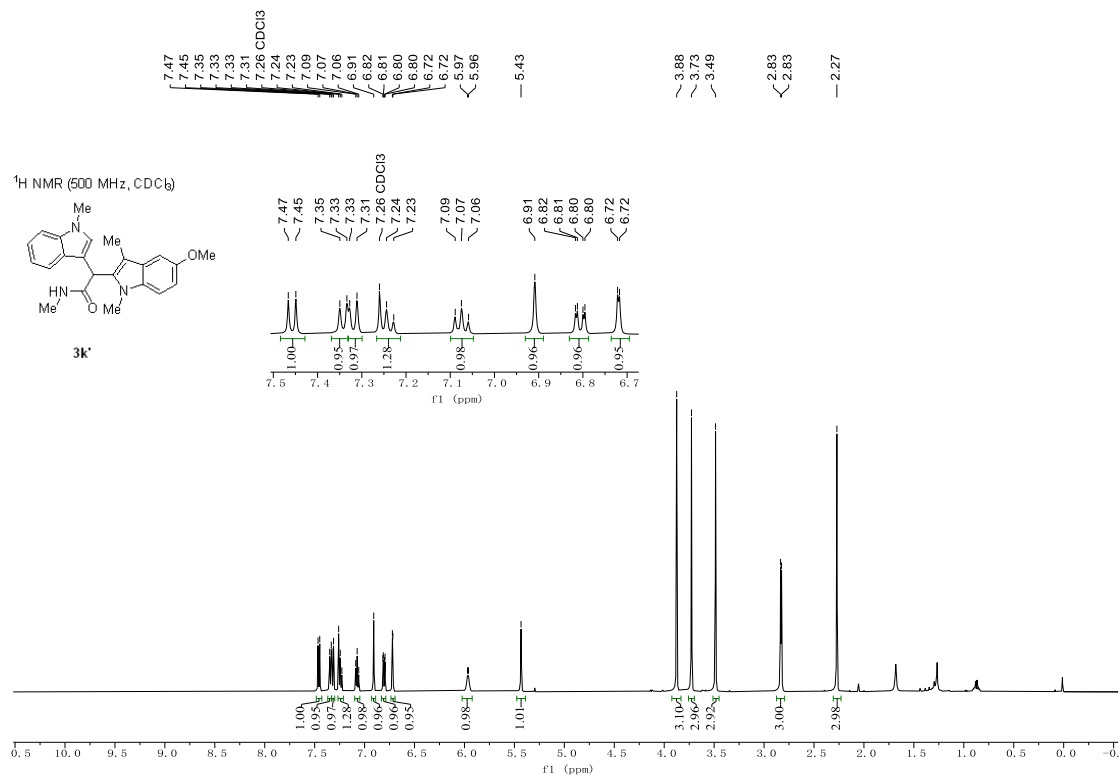

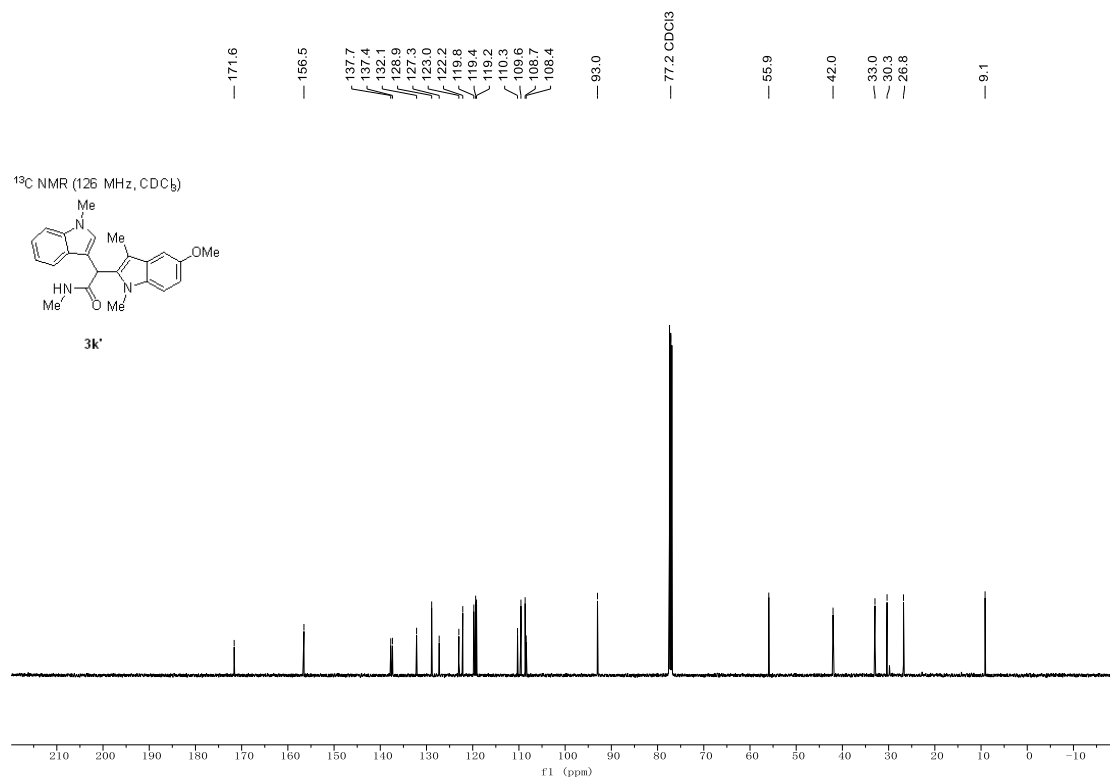

**8-ethyl-1,3a-dimethyl-3-(1-methyl-1*H*-indol-3-yl)-3,3a,8,8a-tetrahydropyrrolo[2,3-*b*]indol-2(1*H*)-one (3l):**

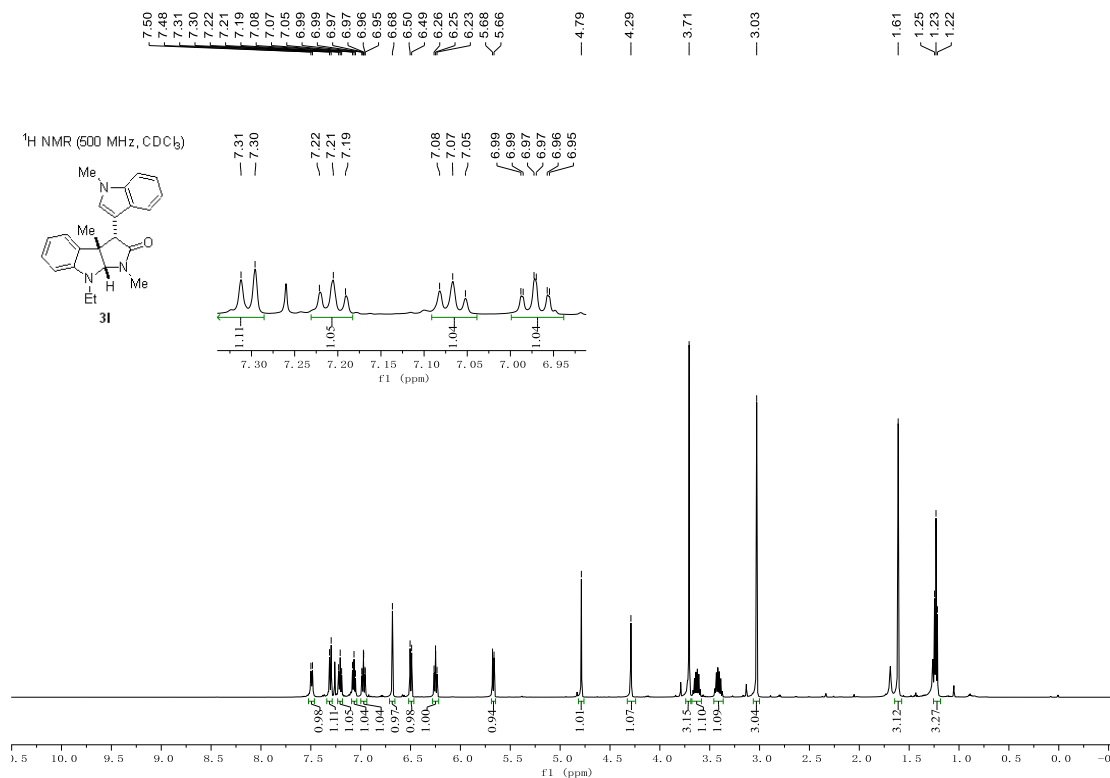



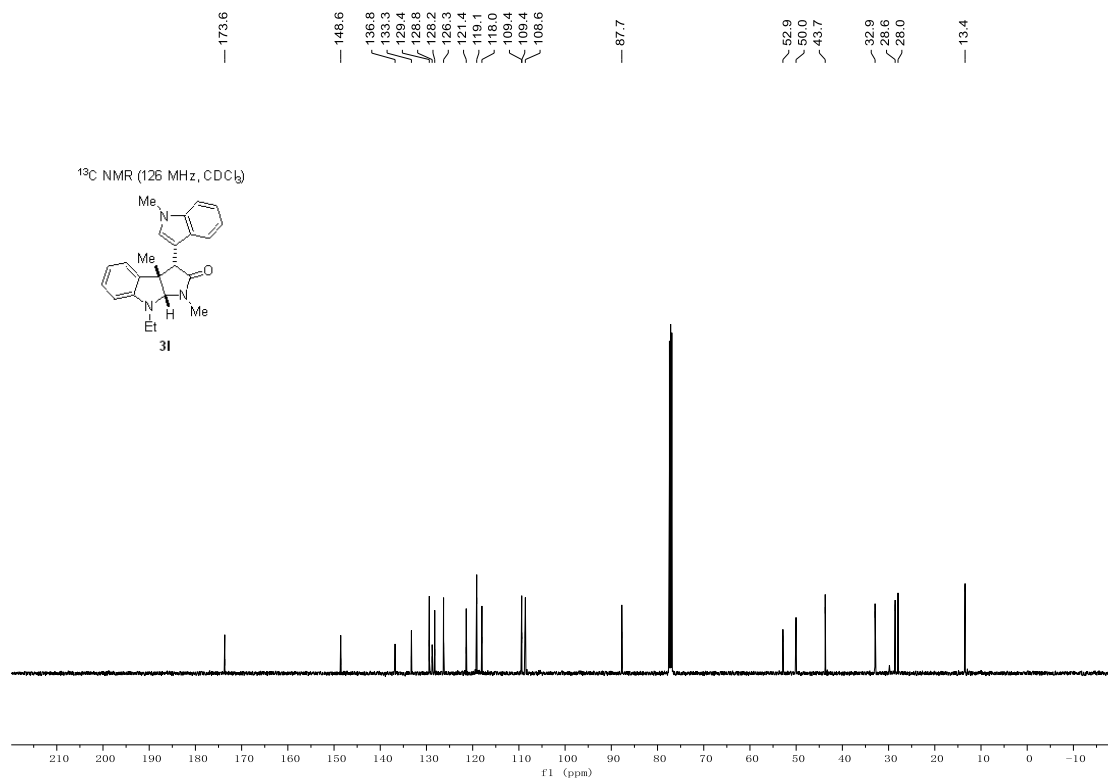

**1,3a-dimethyl-3-(1-methyl-1*H*-indol-3-yl)-8-propyl-3,3a,8,8a-tetrahydropyrrolo[2,3-*b*]indol-2(1*H*)-one(3m):**

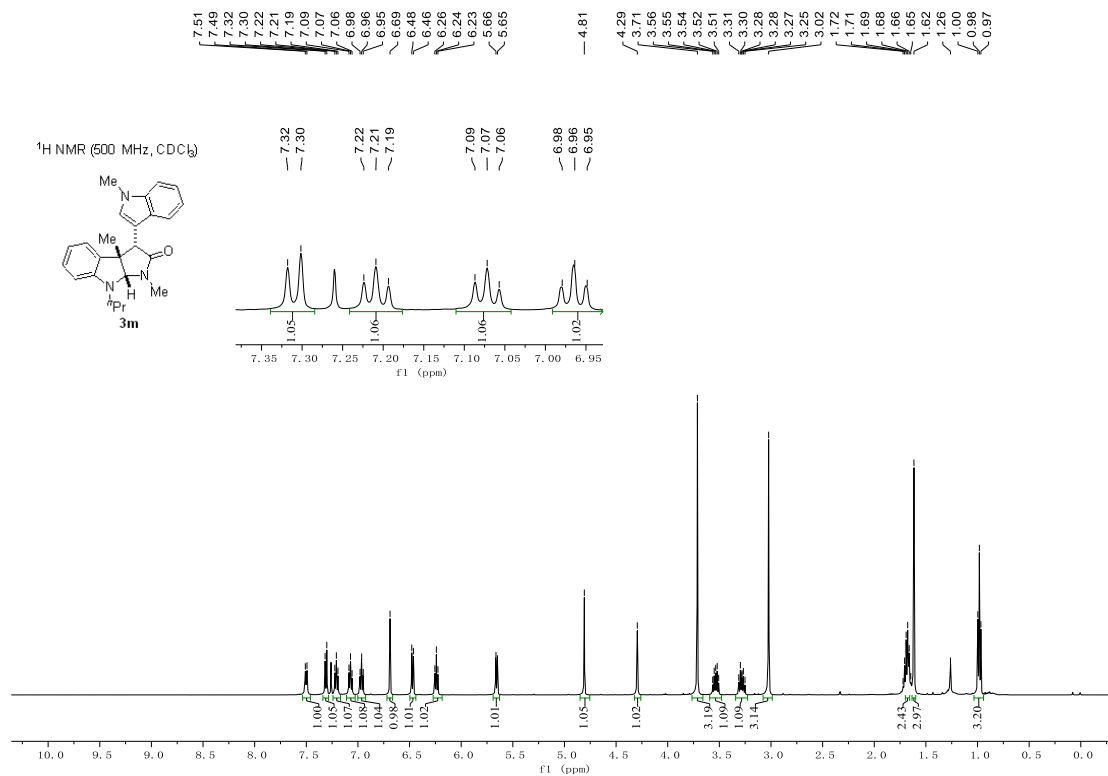



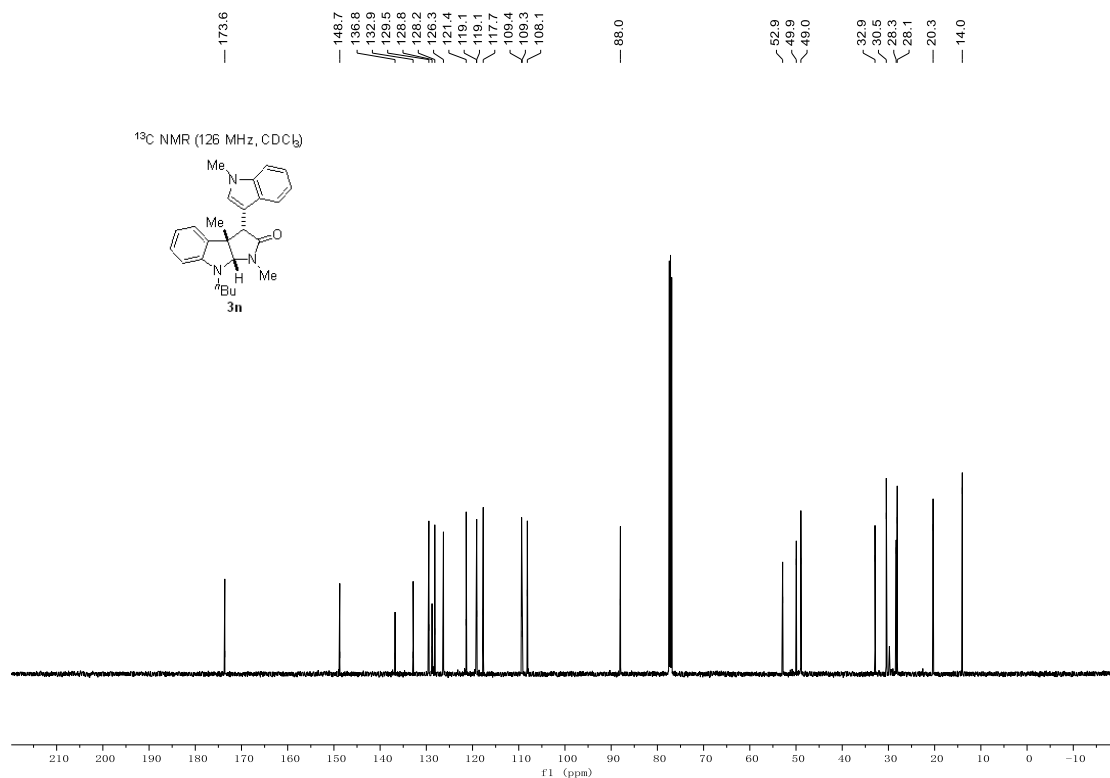

**8-isopropyl-1,3a-dimethyl-3-(1-methyl-1*H*-indol-3-yl)-3,3a,8,8a-tetrahydropyrrolo[2,3-*b*]indol-2(1*H*)-one(3o):**

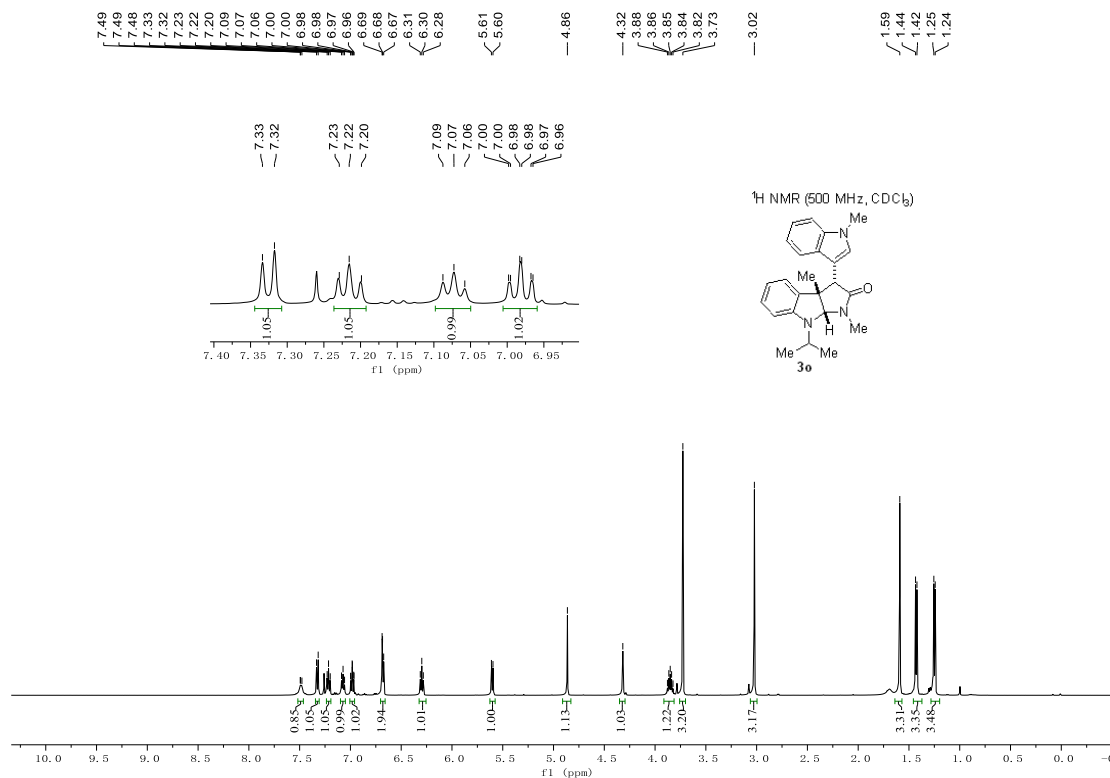

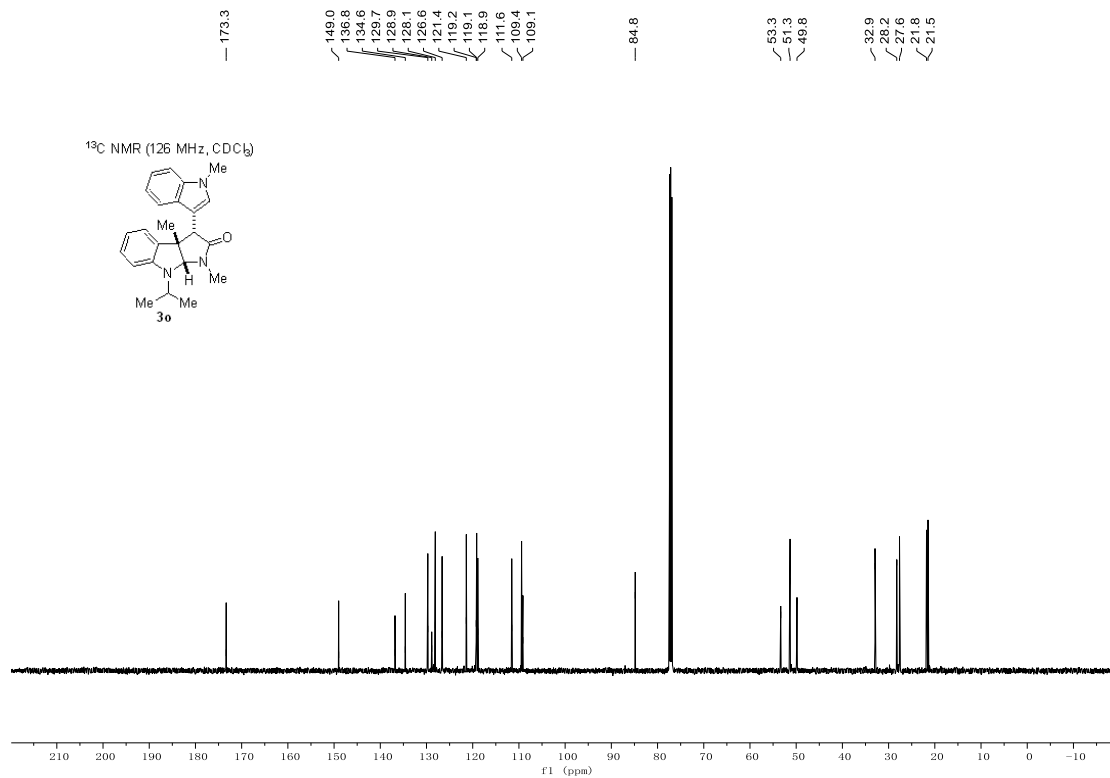

**8-allyl-1,3a-dimethyl-3-(1-methyl-1H-indol-3-yl)-3,3a,8,8a-tetrahydropyrrolo[2,3-b]indol-2(1H)-one(3p):**

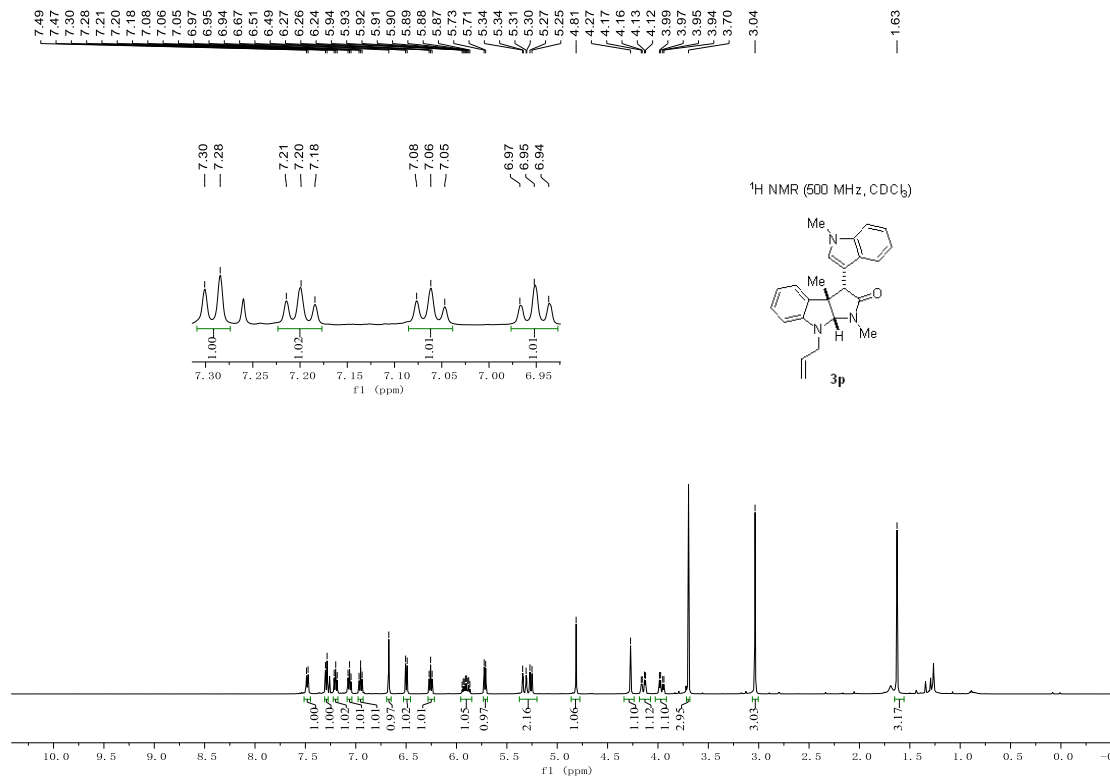

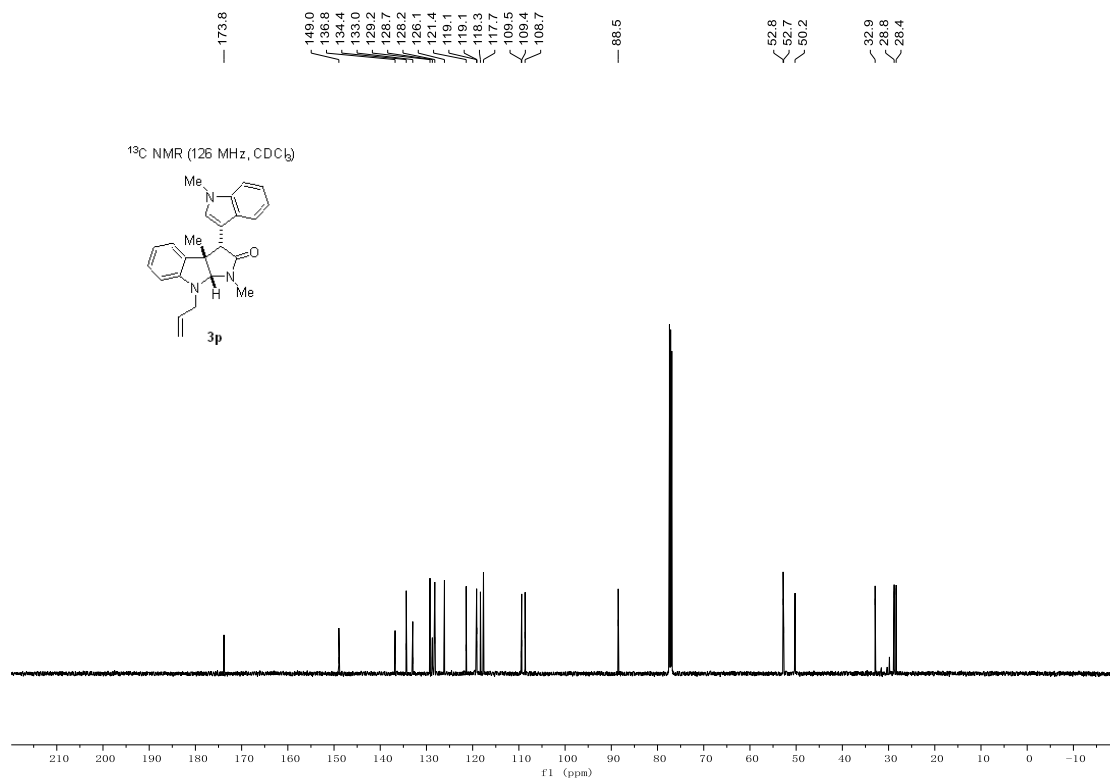

**1,3a-dimethyl-3-(1-methyl-1*H*-indol-3-yl)-8-(prop-2-yn-1-yl)-3,3a,8,8a-tetrahydropyrrolo[2,3-*b*]indol-2(1*H*)-one (3q):**

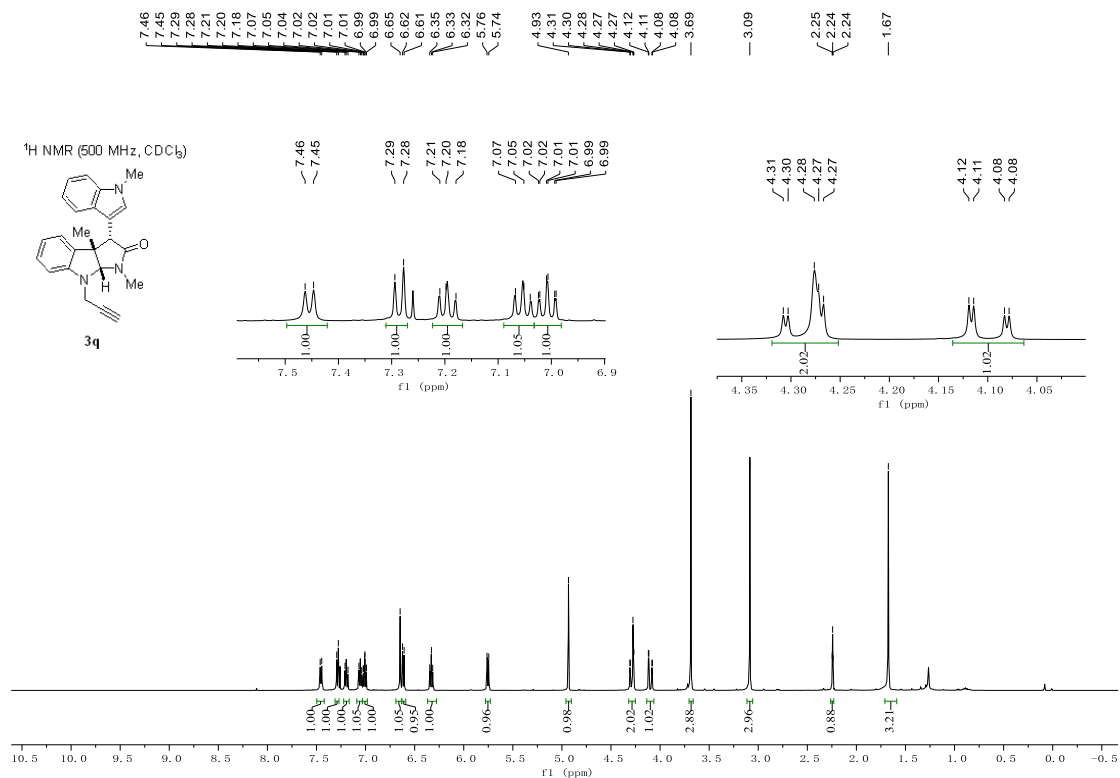

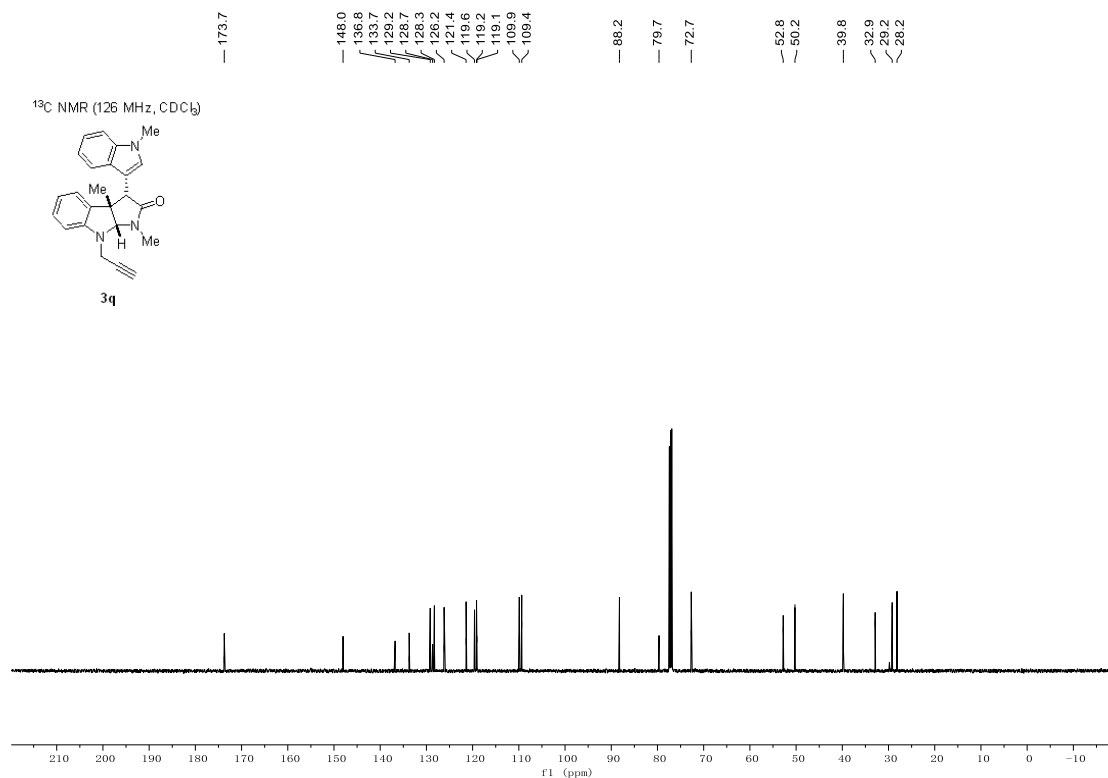

**8-benzyl-1,3a-dimethyl-3-(1-methyl-1*H*-indol-3-yl)-3,3a,8,8a-tetrahydropyrrolo[2,3-*b*]indol-2(1*H*)-one (3r):**

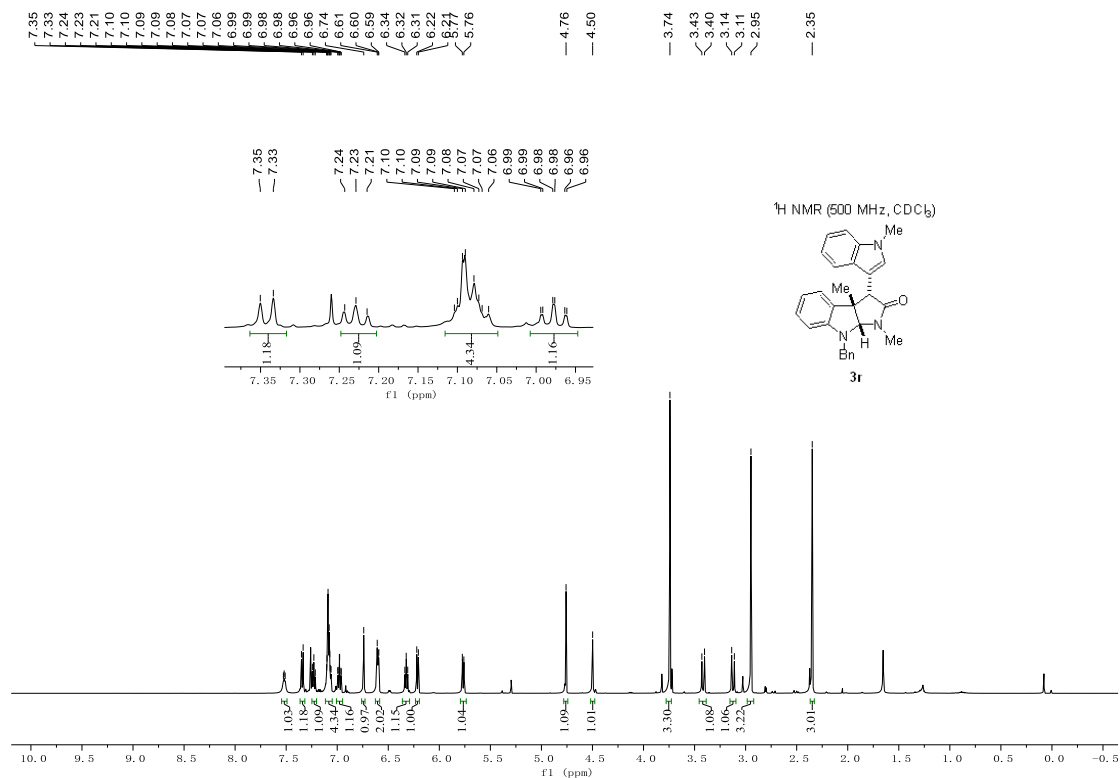

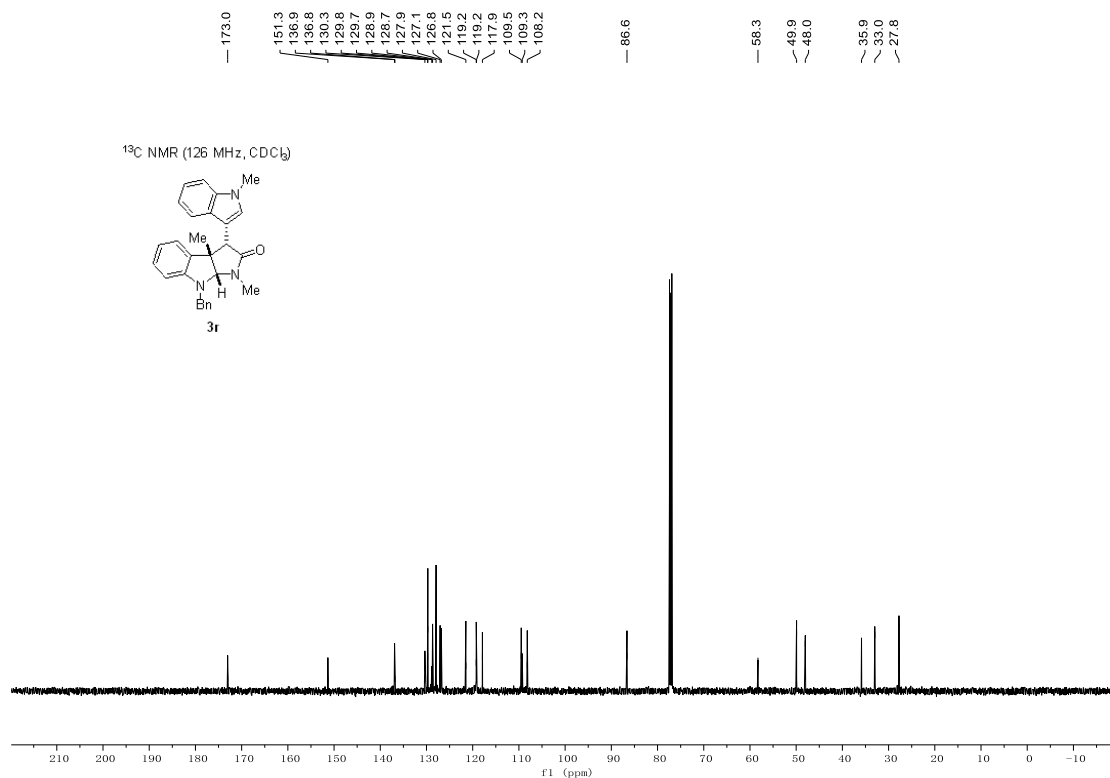

**1,3a-dimethyl-3-(1-methyl-1*H*-indol-3-yl)-8-phenyl-3,3a,8,8a-tetrahydropyrrolo[2,3-*b*]indol-2(1*H*)-one (3s):**

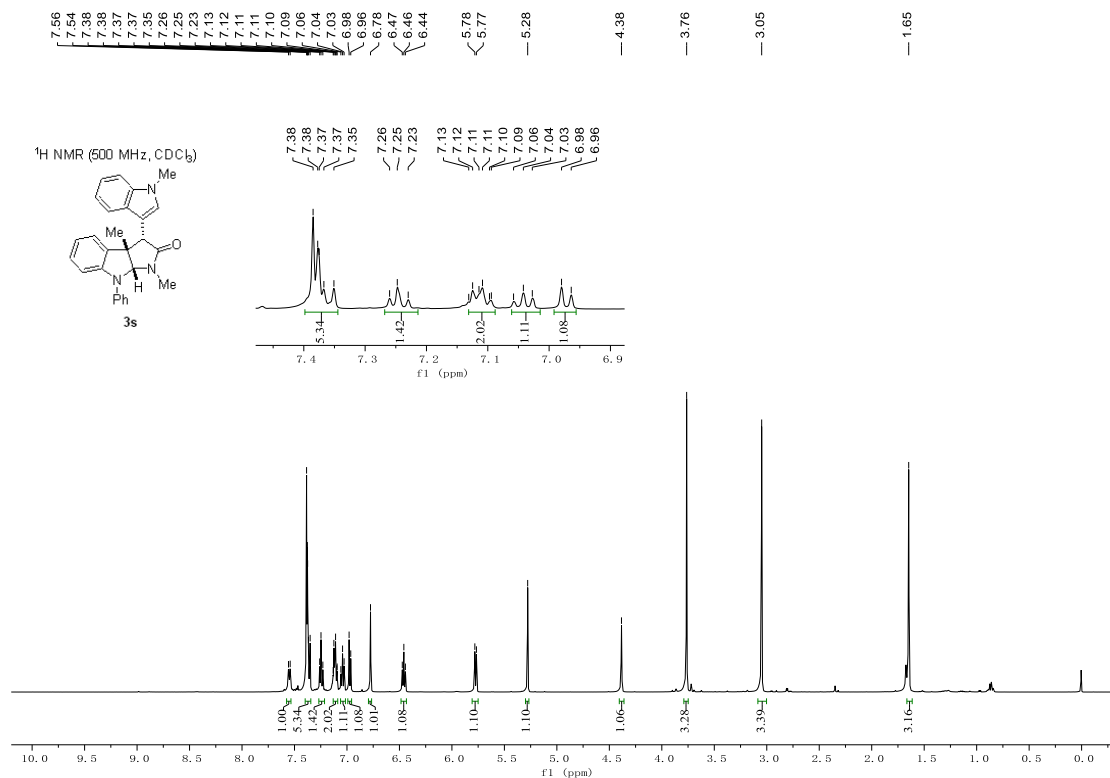

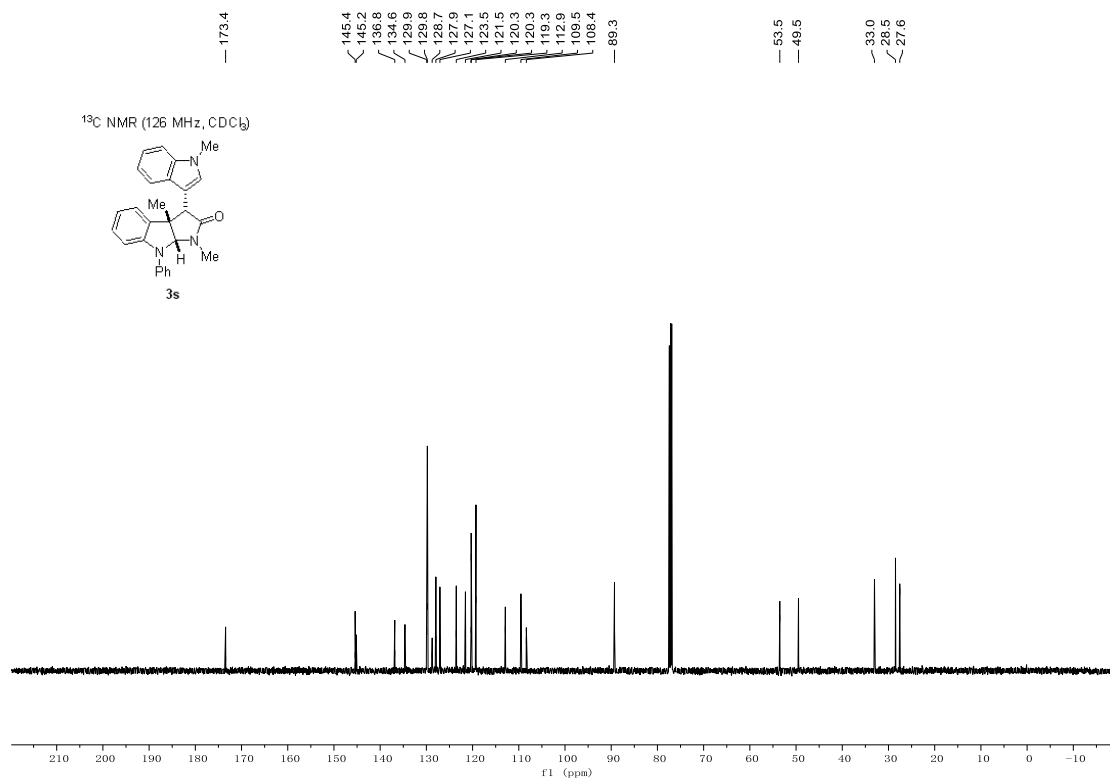

**3a-(methoxymethyl)-1,8-dimethyl-3-(1-methyl-1*H*-indol-3-yl)-3,3a,8,8a-tetrahydropyrrolo[2,3-*b*]indol-2(1*H*)-one(4a):**

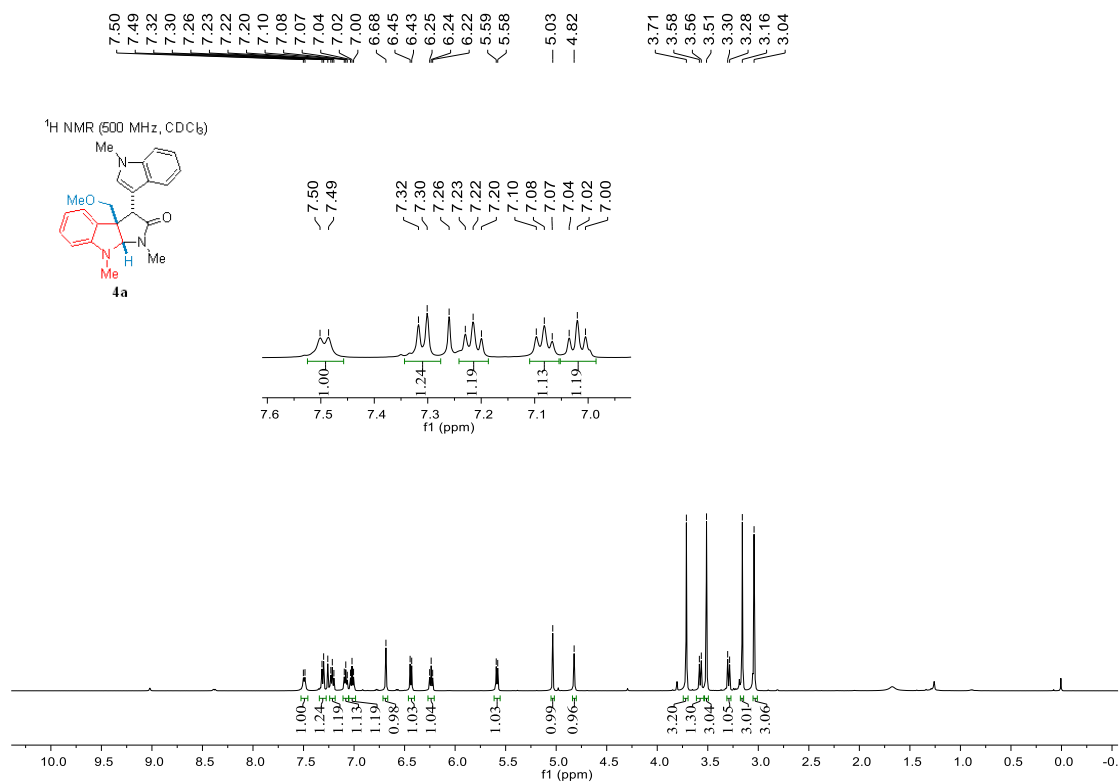



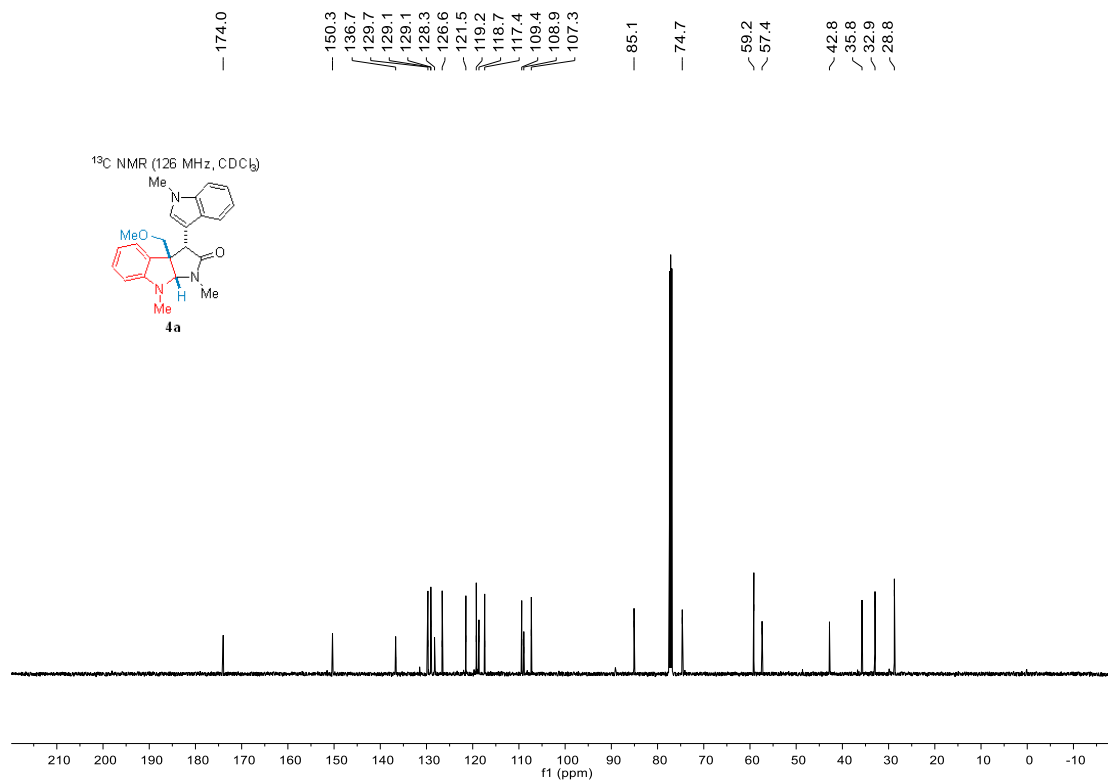

**2-(1,8-dimethyl-3-(1-methyl-1*H*-indol-3-yl)-2-oxo-2,3,8,8a-tetrahydropyrrolo[2,3-*b*]indol-3*a*(1*H*)-yl)ethyl acetate (**4b**)**

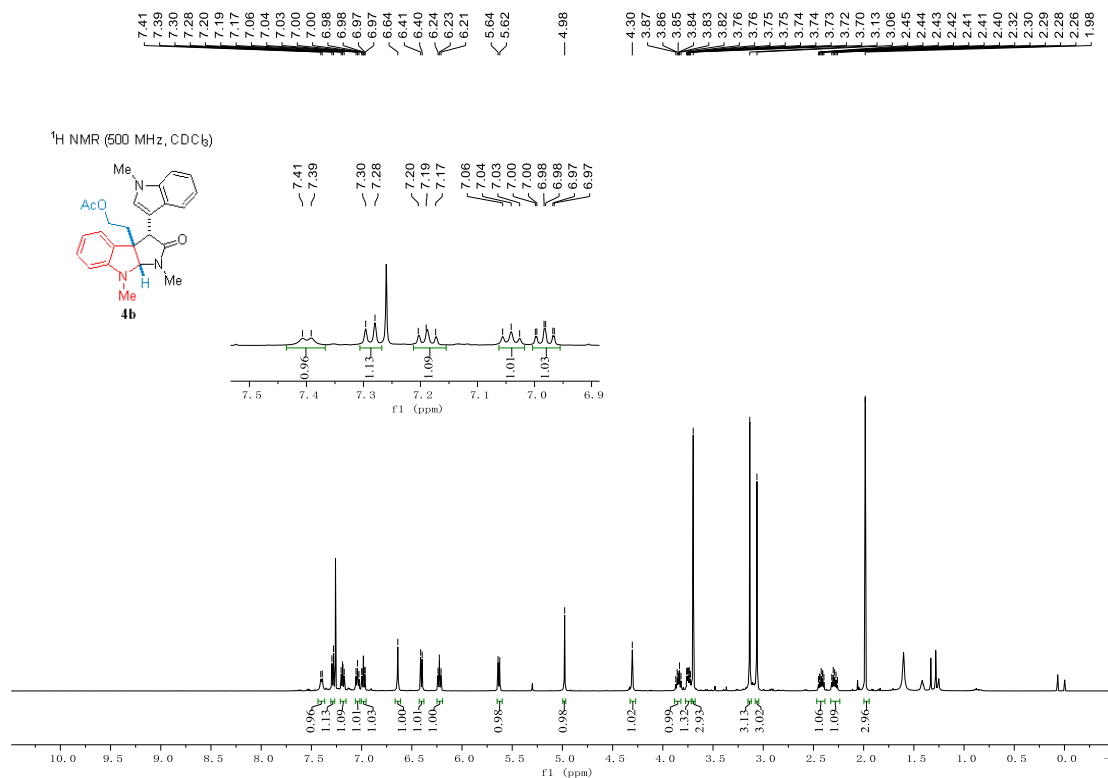

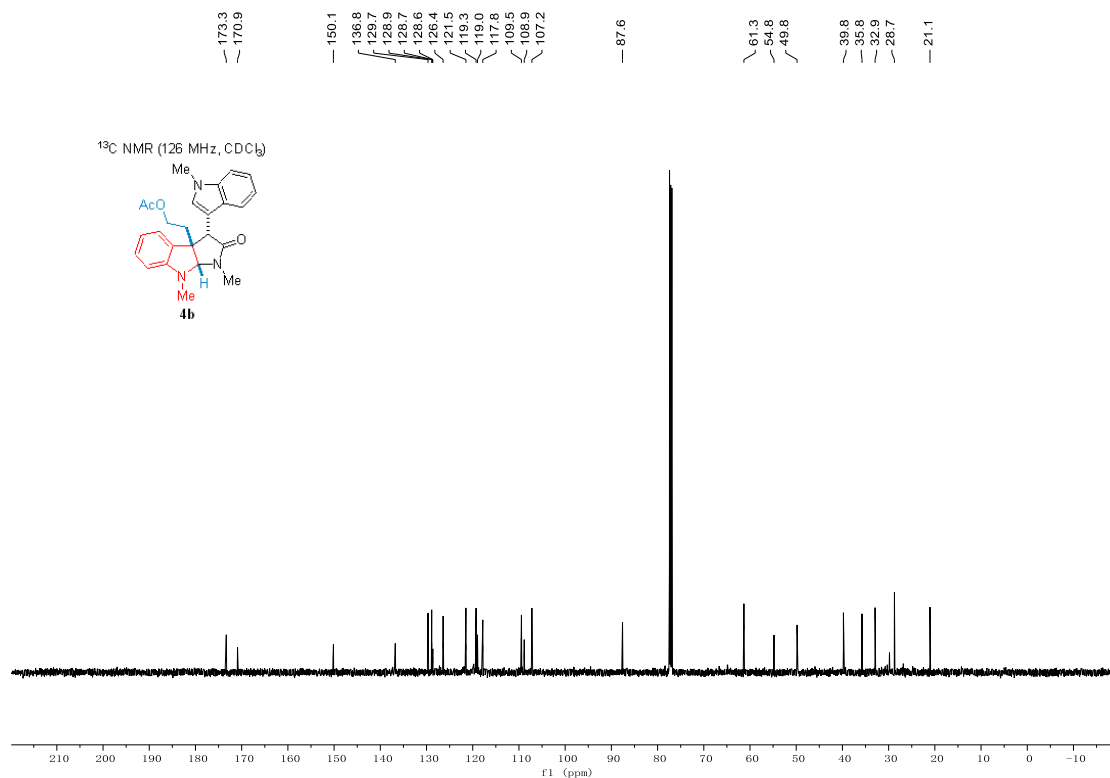

**3a-allyl-1,8-dimethyl-3-(1-methyl-1*H*-indol-3-yl)-3,3a,8,8a-tetrahydropyrrolo[2,3-*b*]indol-2(1*H*)-one (4c):**

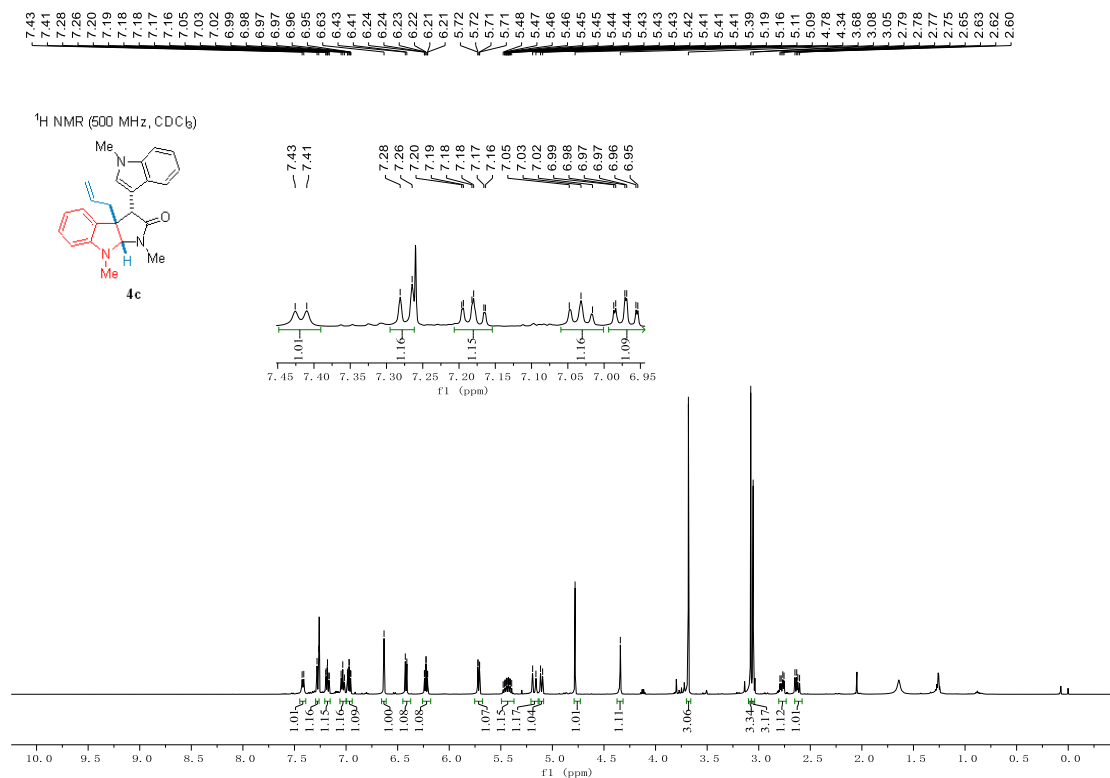

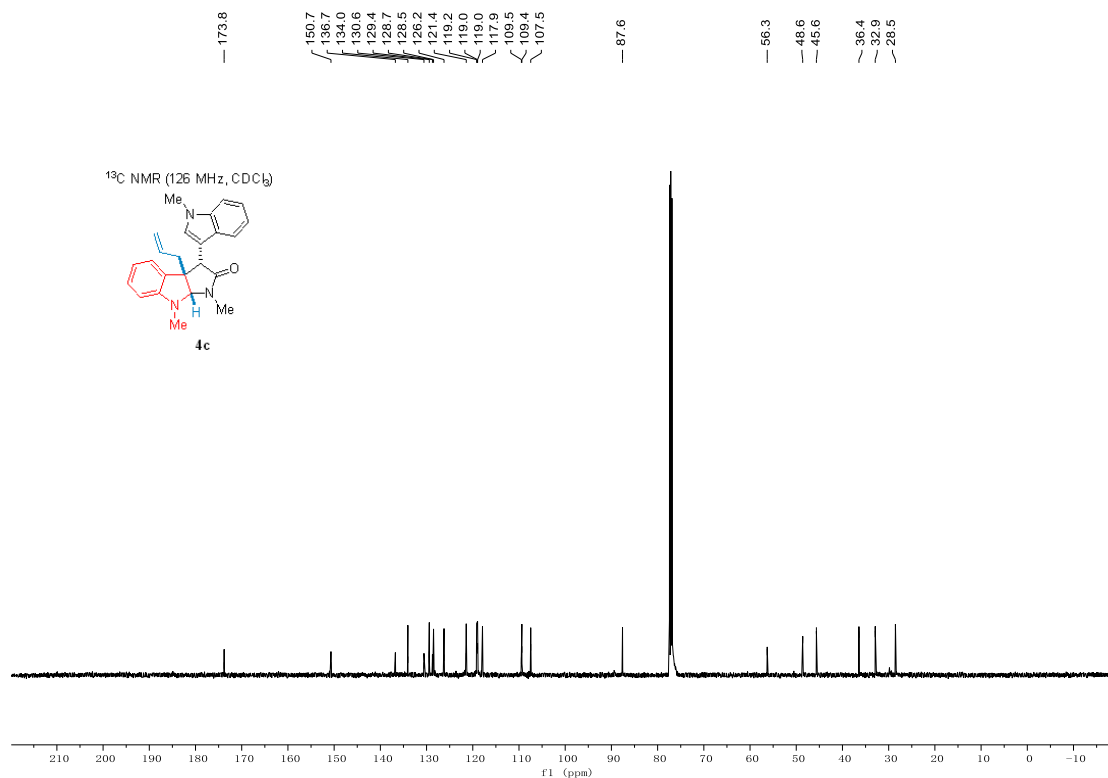

**3a-(2-chloroethyl)-1,8-dimethyl-3-(1-methyl-1*H*-indol-3-yl)-3,3a,8,8a-tetrahydropyrrolo[2,3-*b*]indol-2(1*H*)-one (4d):**

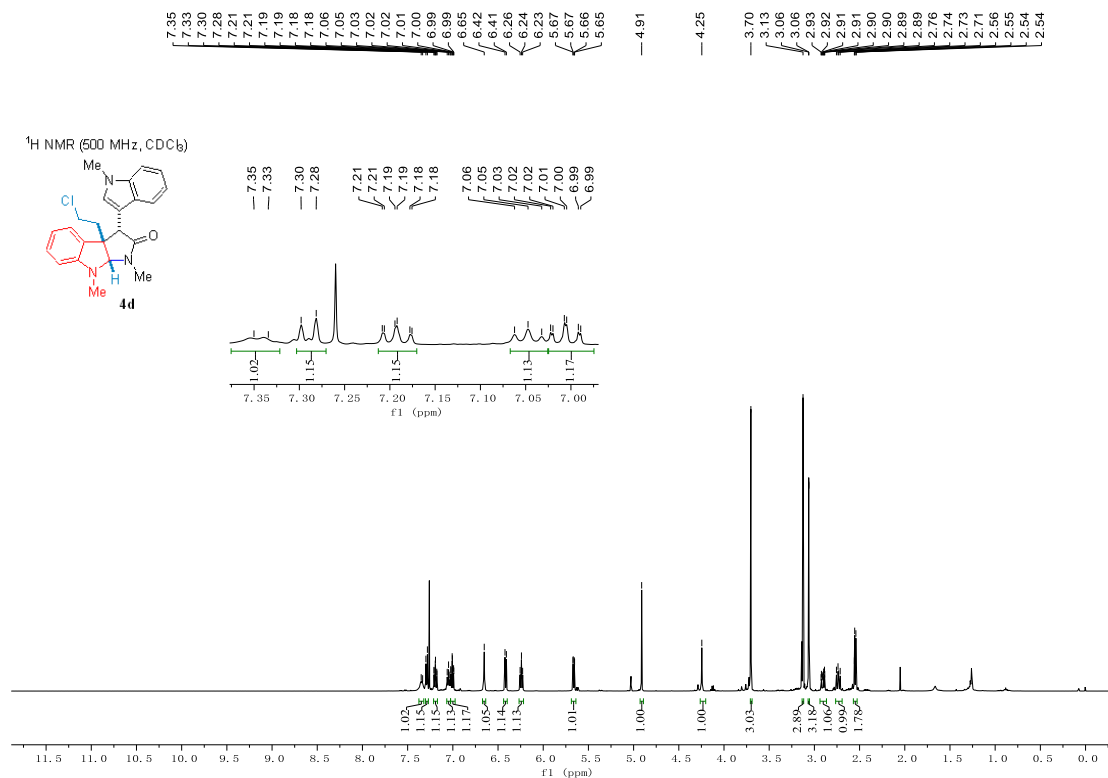

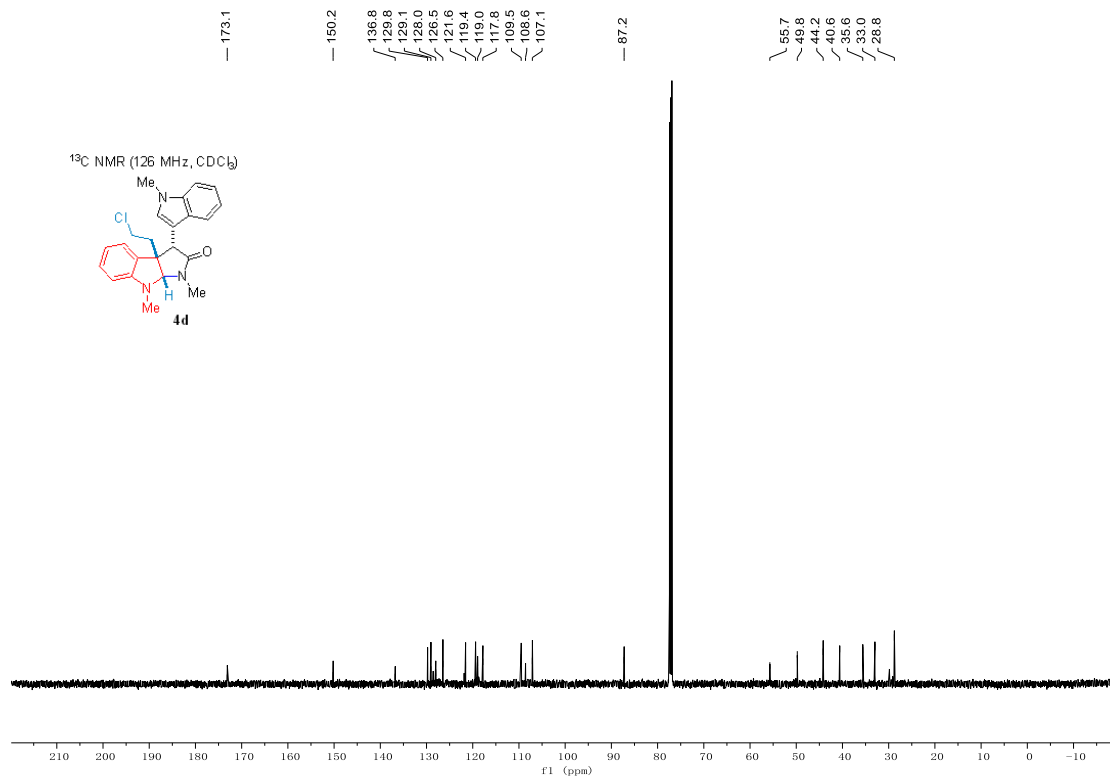

**2-(1,8-dimethyl-3-(1-methyl-1*H*-indol-3-yl)-2-oxo-2,3,8,8a-tetrahydropyrrolo[2,3-*b*]indol-3*a*(1*H*)-yl)ethyl 4-methylbenzenesulfonate (4e):**

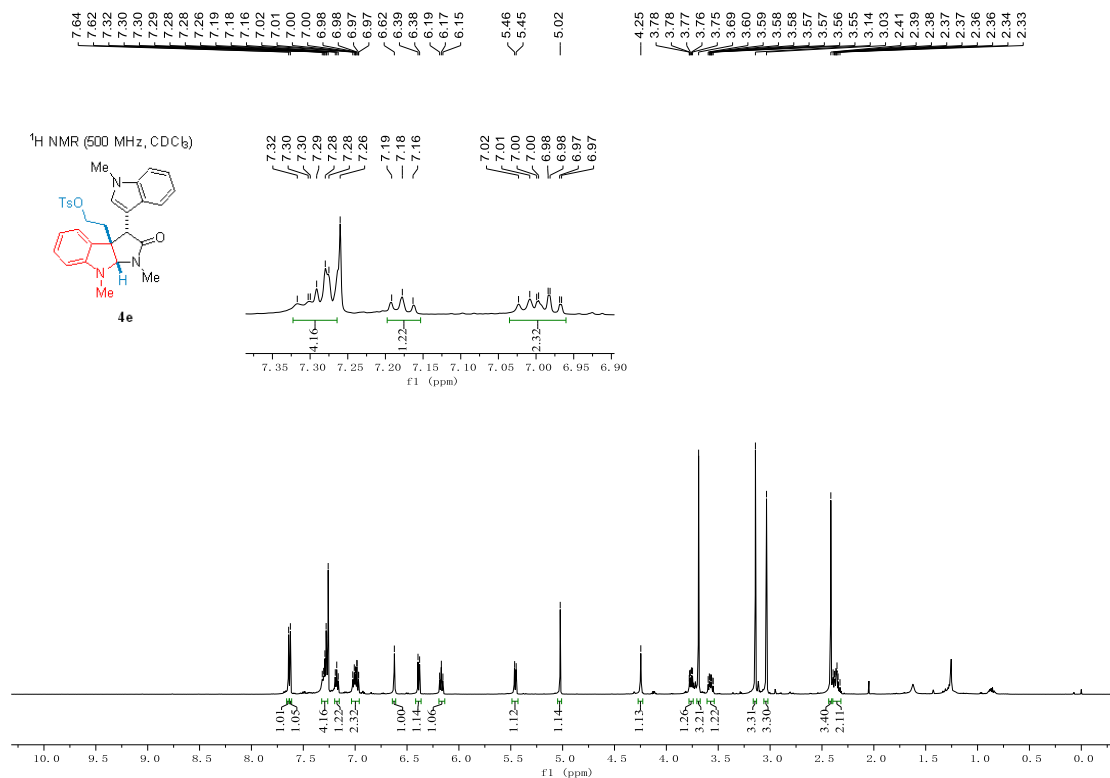

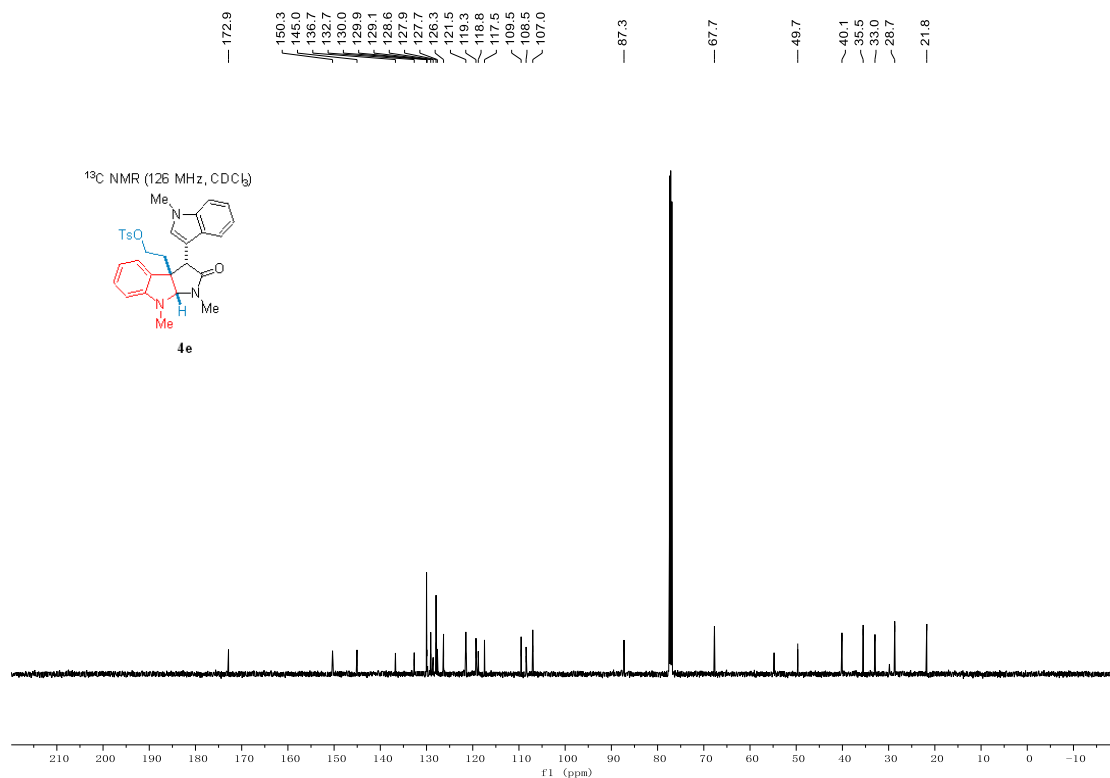

**methyl 2-(1,8-dimethyl-3-(1-methyl-1*H*-indol-3-yl)-2-oxo-2,3,8,8a-tetrahydropyrrolo[2,3-*b*]indol-3a(1*H*)-yl)acetate (**4f**):**

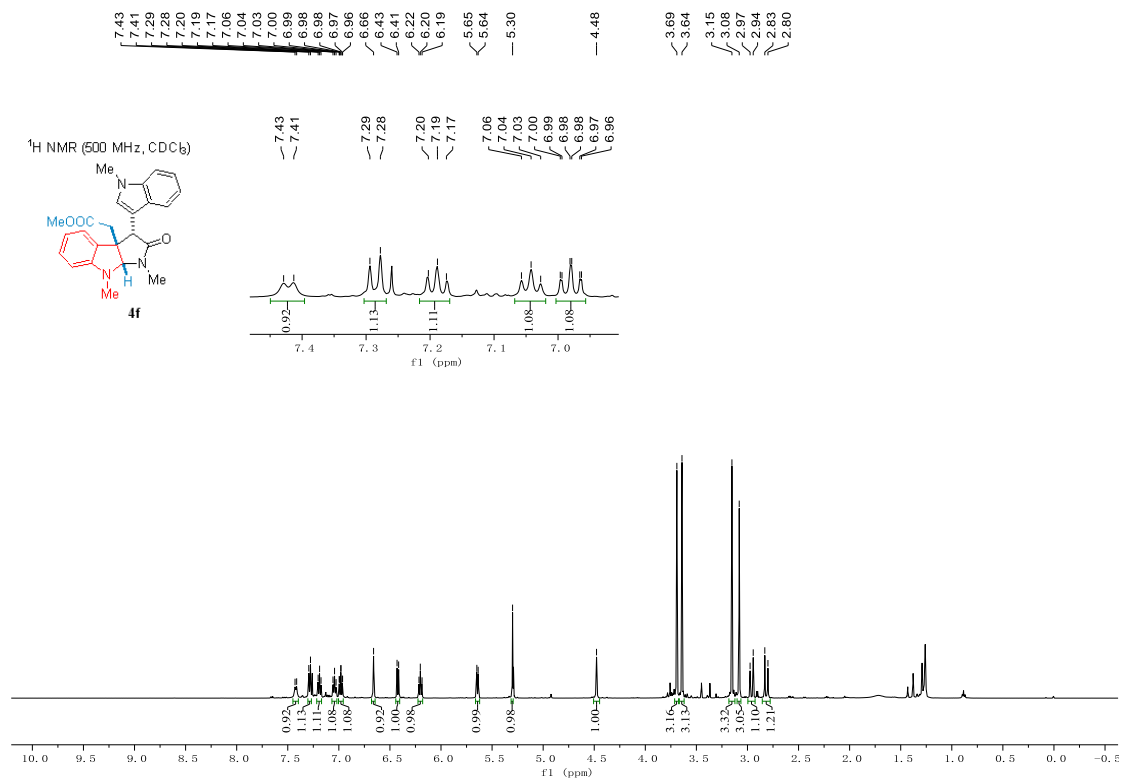

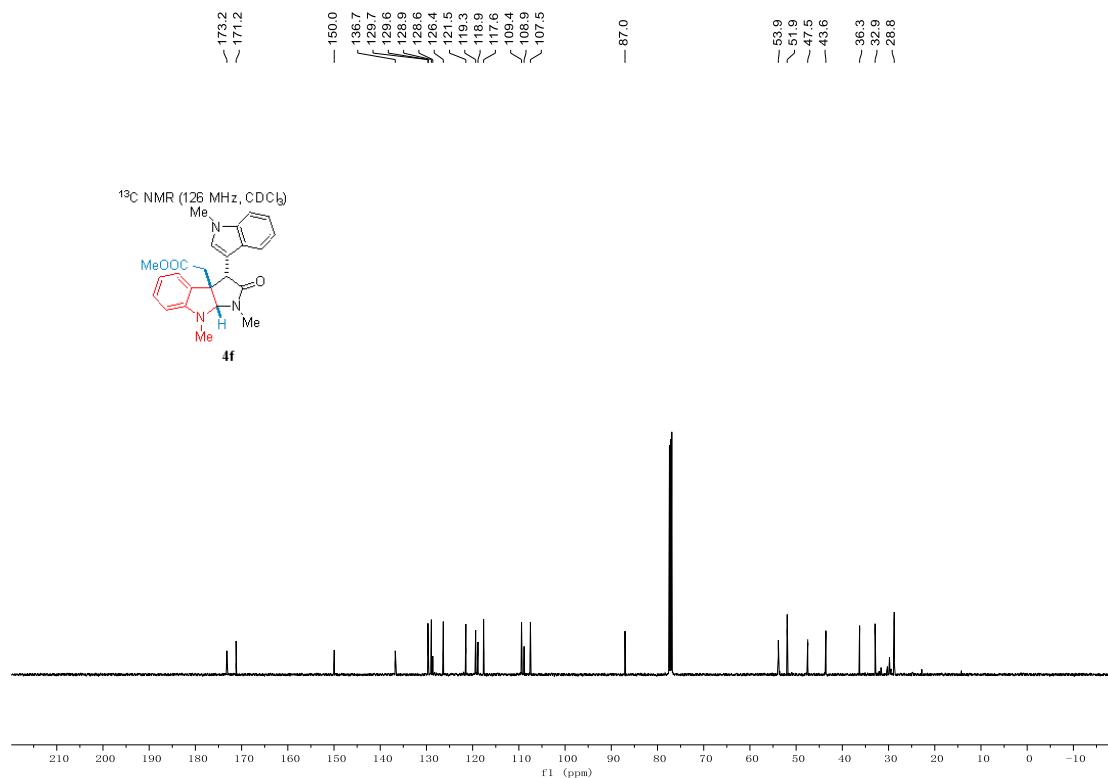

**3a-benzyl-1,8-dimethyl-3-(1-methyl-1H-indol-3-yl)-3,3a,8,8a-tetrahydropyrrolo[2,3-b]indol-2(1H)-one (4g):**

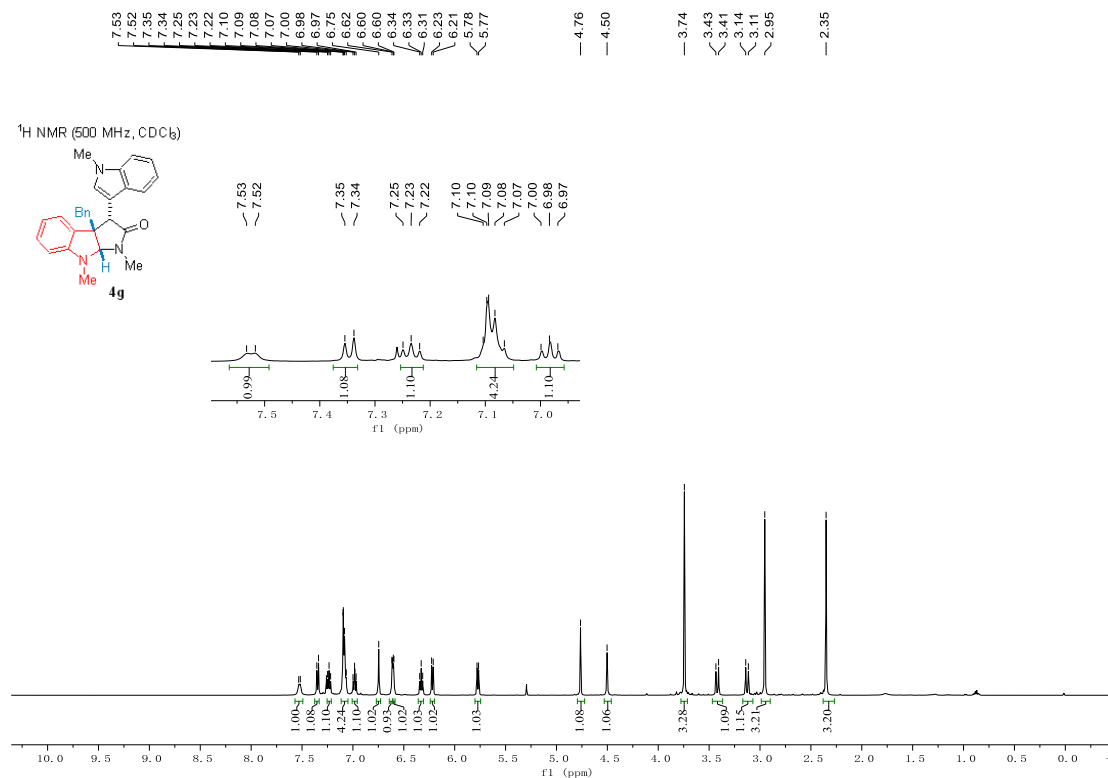

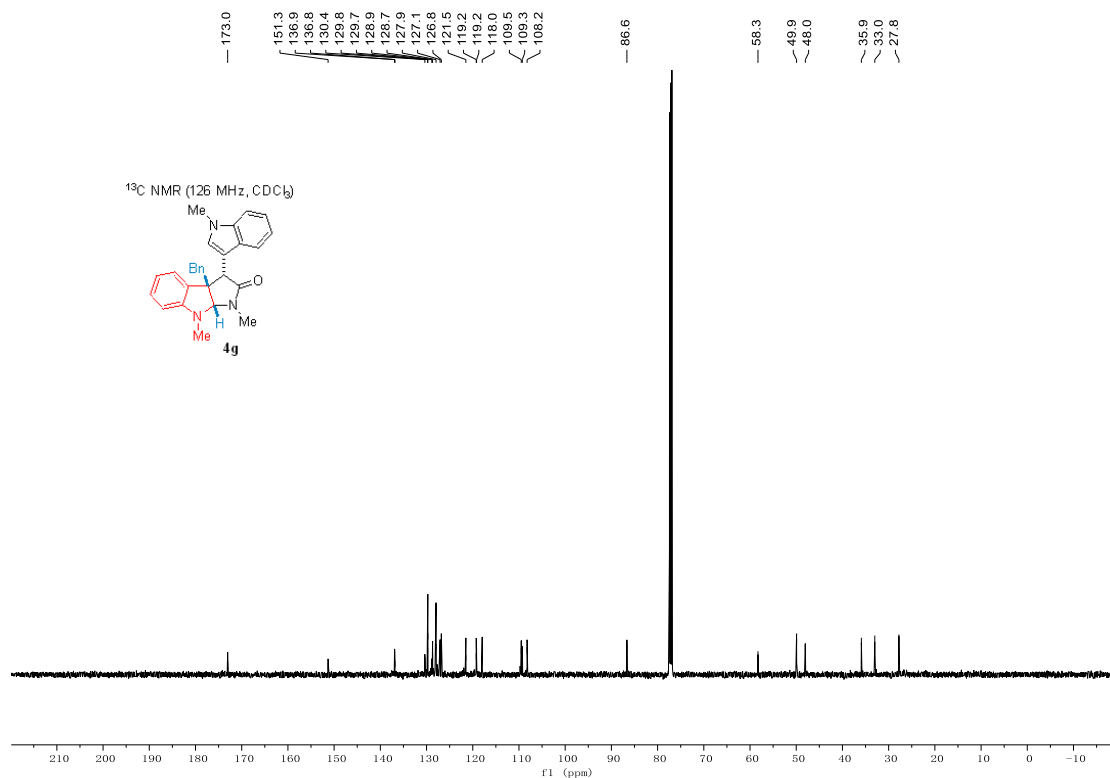

**3a-(cyclopropylmethyl)-1,8-dimethyl-3-(1-methyl-1*H*-indol-3-yl)-3,3a,8,8a-tetrahydropyrrolo[2,3-*b*]indol-2(1*H*)-one (4h):**

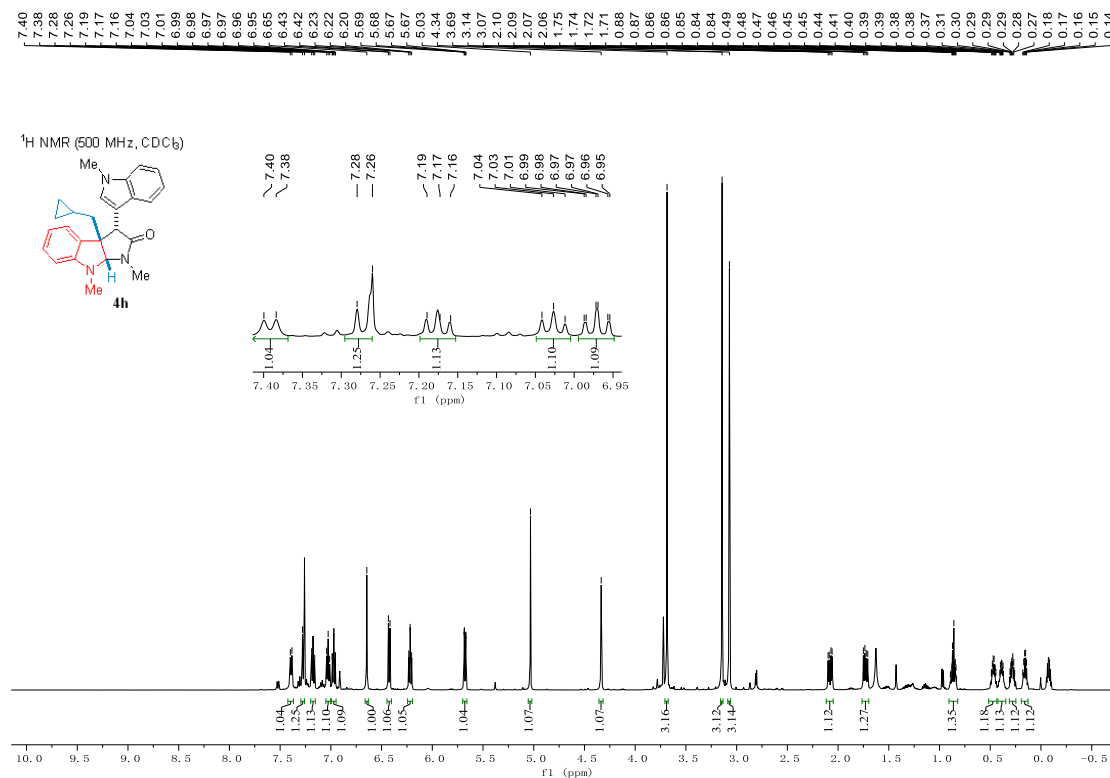

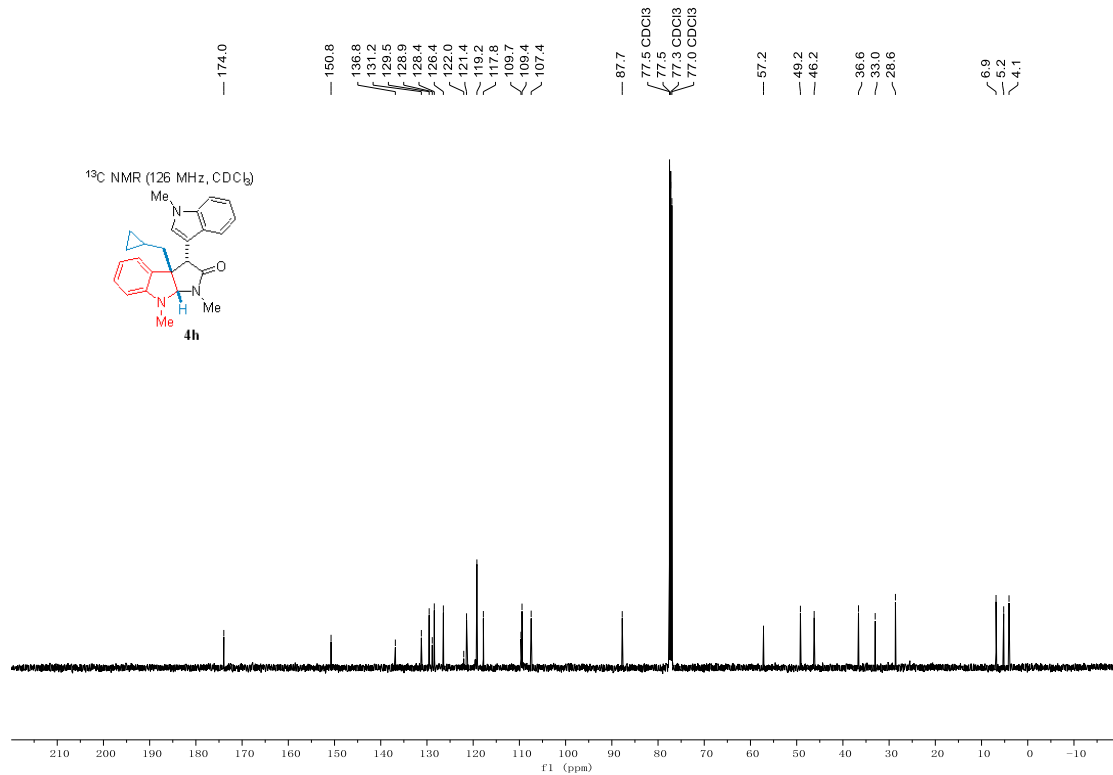

**1,8-dimethyl-3-(1-methyl-1*H*-indol-3-yl)-3a-(naphthalen-2-ylmethyl)-3,3a,8,8a-tetrahydropyrrolo[2,3-*b*]indol-2(1*H*)-one (4i):**

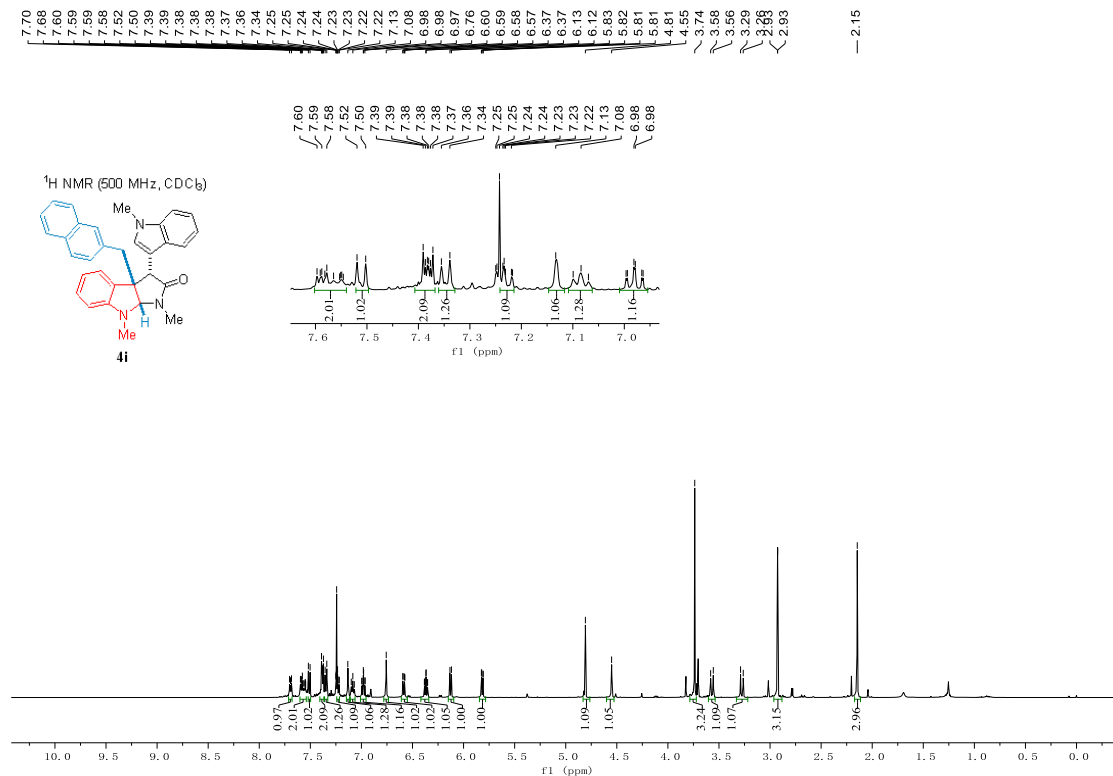



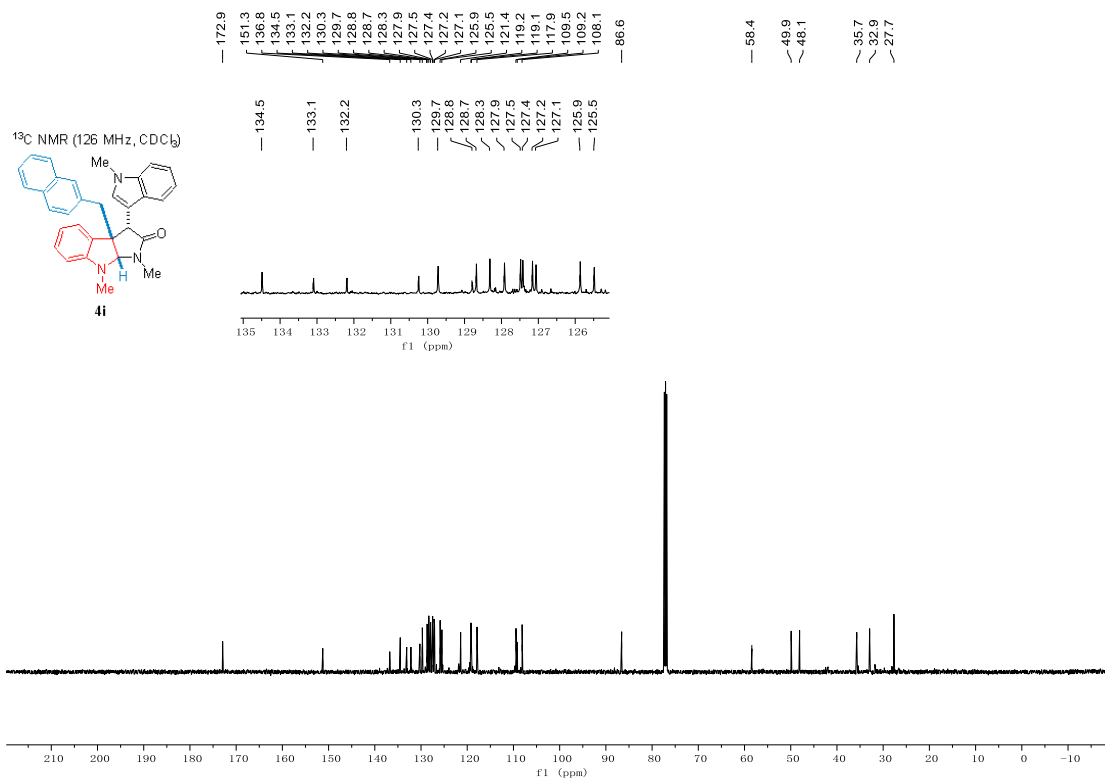

**3a-(benzo[*b*]thiophen-2-ylmethyl)-1,8-dimethyl-3-(1-methyl-1*H*-indol-3-yl)-3,3a,8,8a-tetrahydropyrrolo[2,3-*b*]indol-2(1*H*)-one(**4j**):**

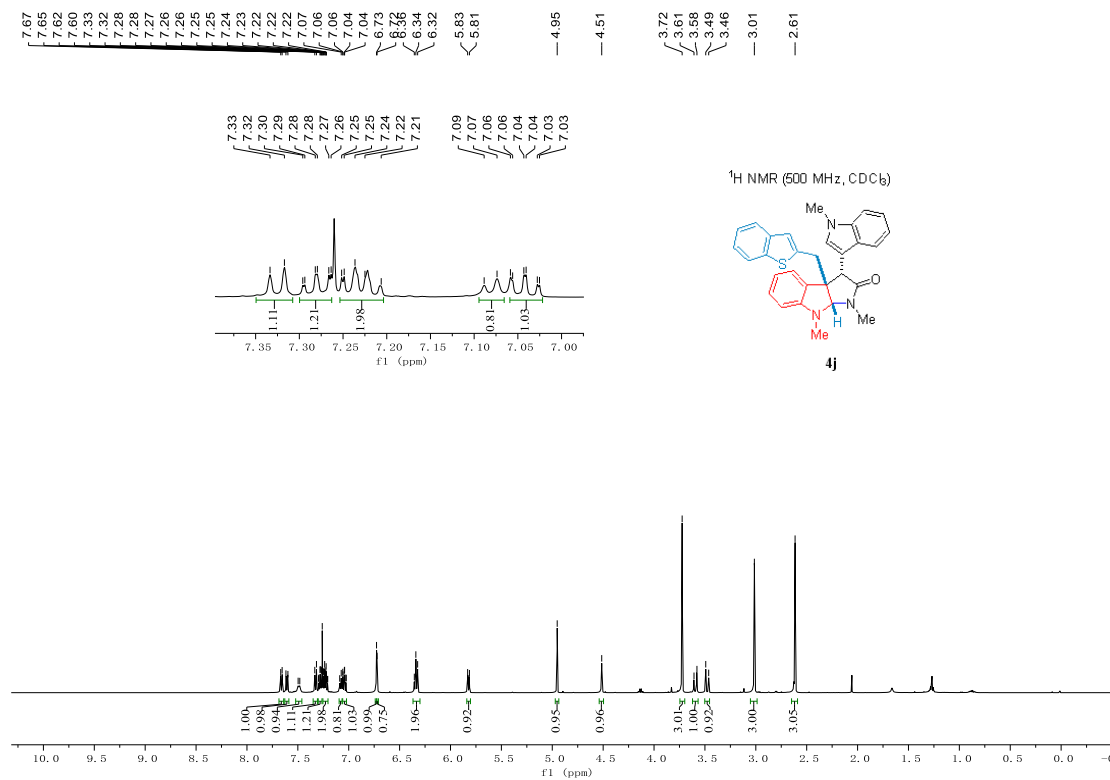



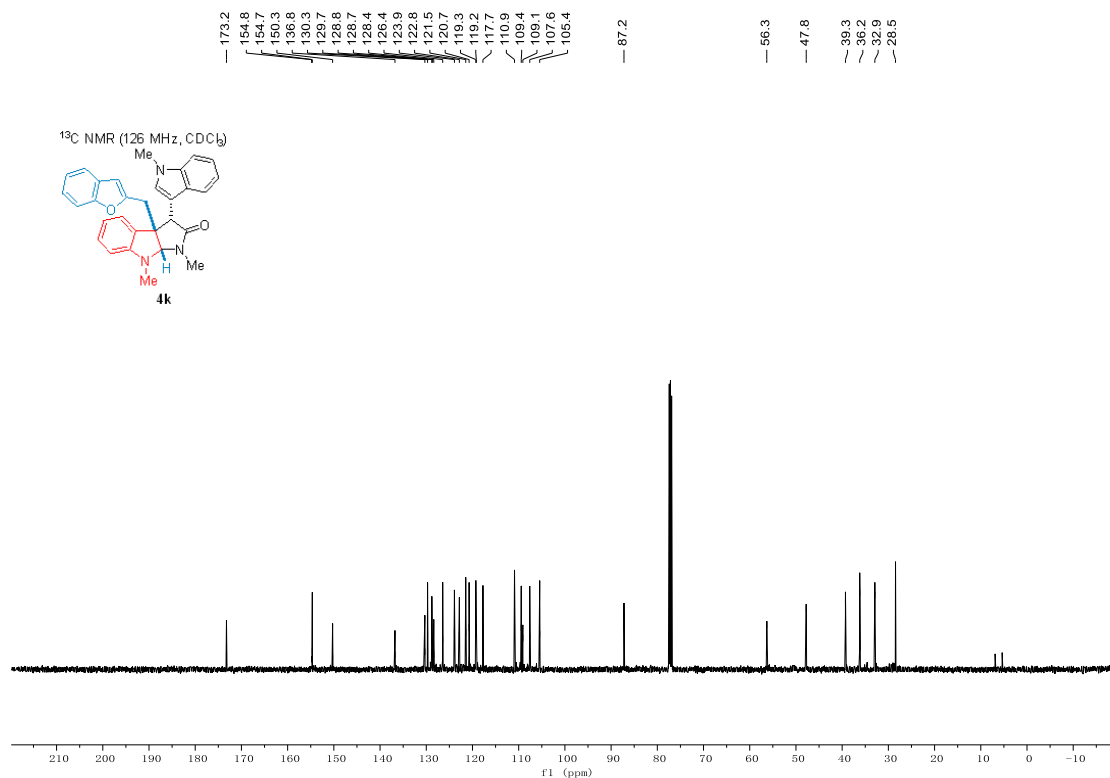

**1,8-dimethyl-3-(1-methyl-1*H*-indol-3-yl)-3a-((4-oxo-4*H*-chromen-3-yl)methyl)-3,3a,8,8a-tetrahydropyrrolo[2,3-*b*]indol-2(1*H*)-one(4l):**

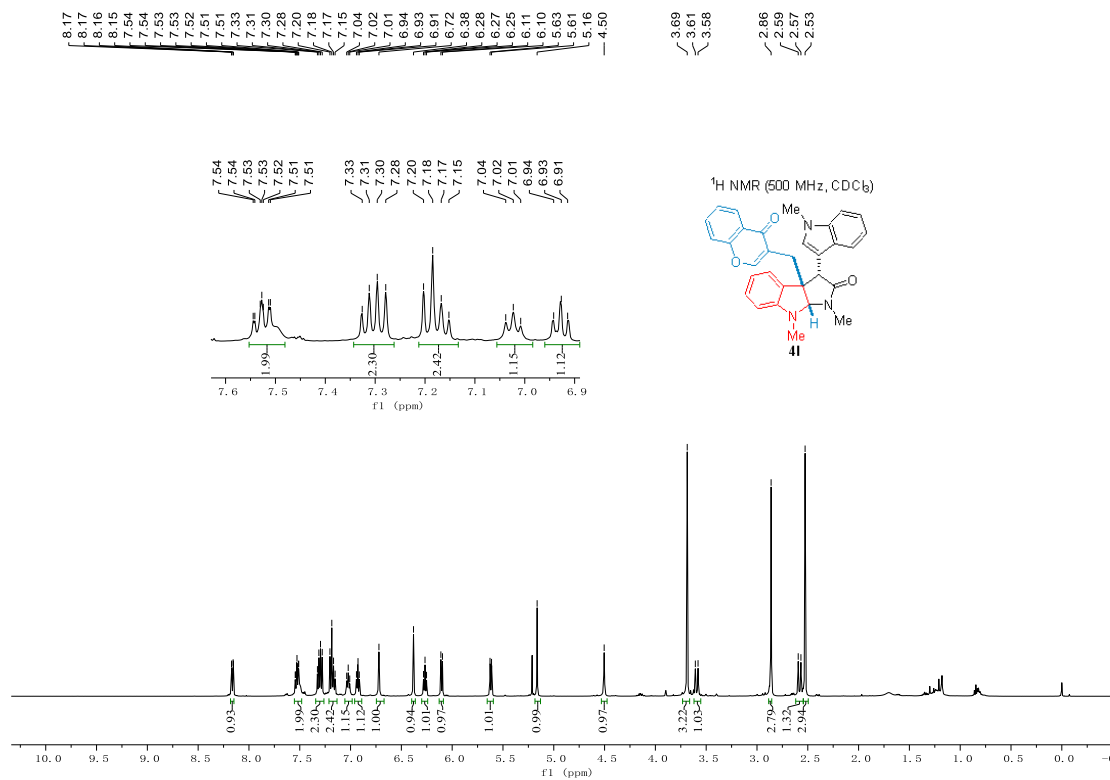

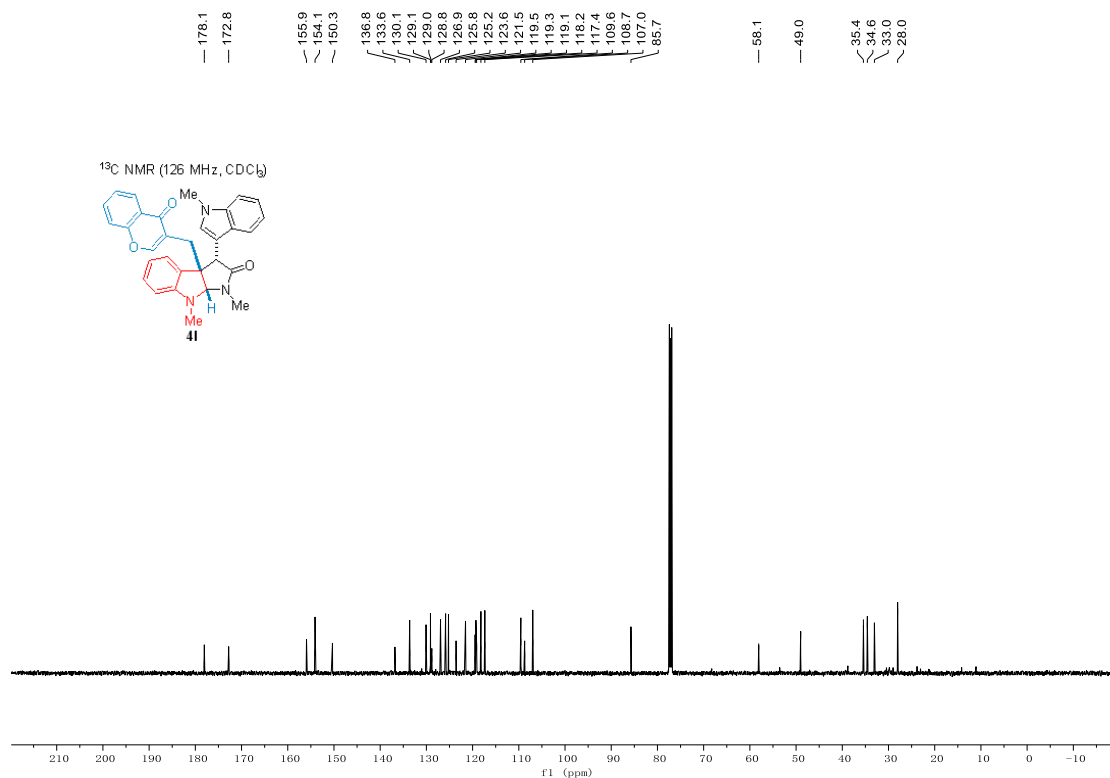

**4-((1,8-dimethyl-3-(1-methyl-1*H*-indol-3-yl)-2-oxo-2,3,8a-tetrahydropyrrolo[2,3-*b*]indol-3a(1*H*)-yl)methyl)phenyl (*E*)-2-(5-fluoro-2-methyl-1-(4-(methylsulfinyl)benzylidene)-1*H*-inden-3-yl)acetate(**4m**):**

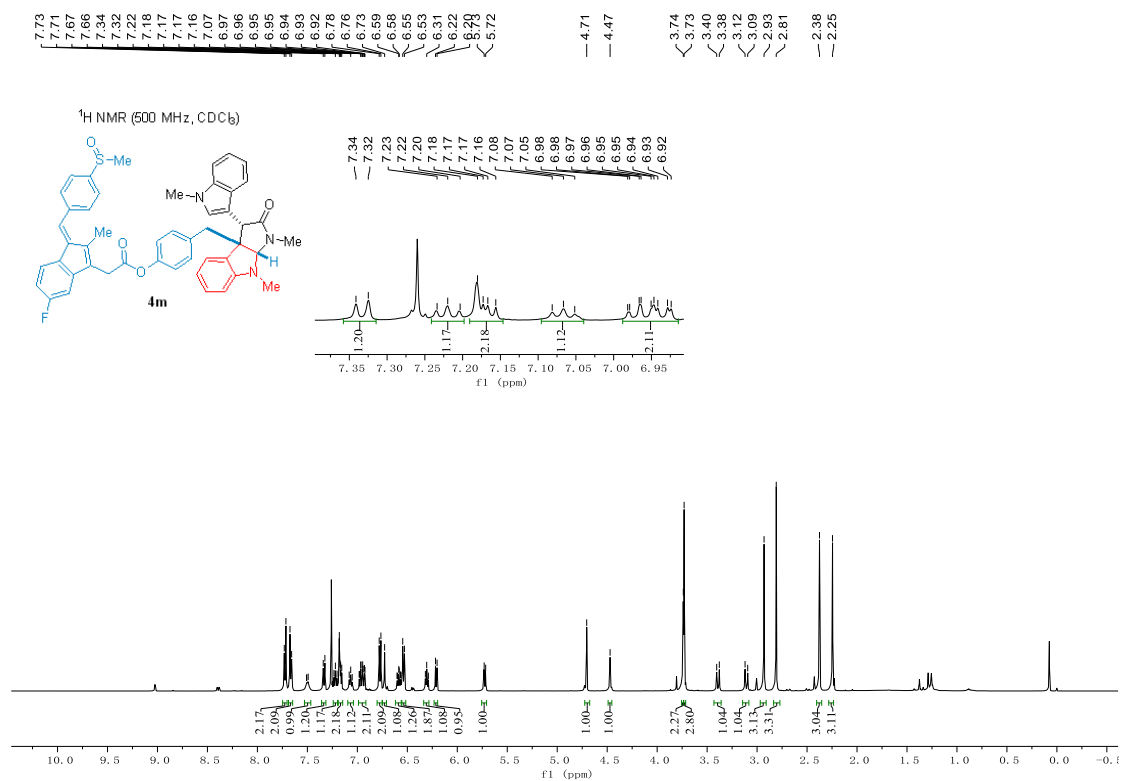

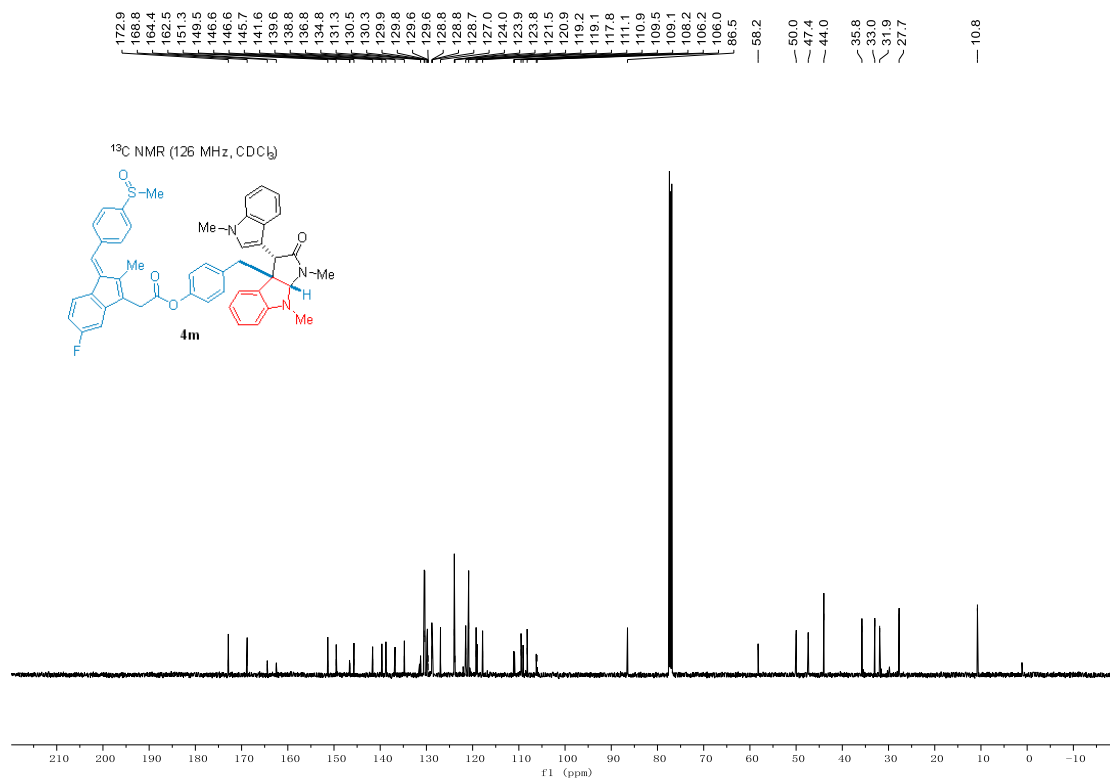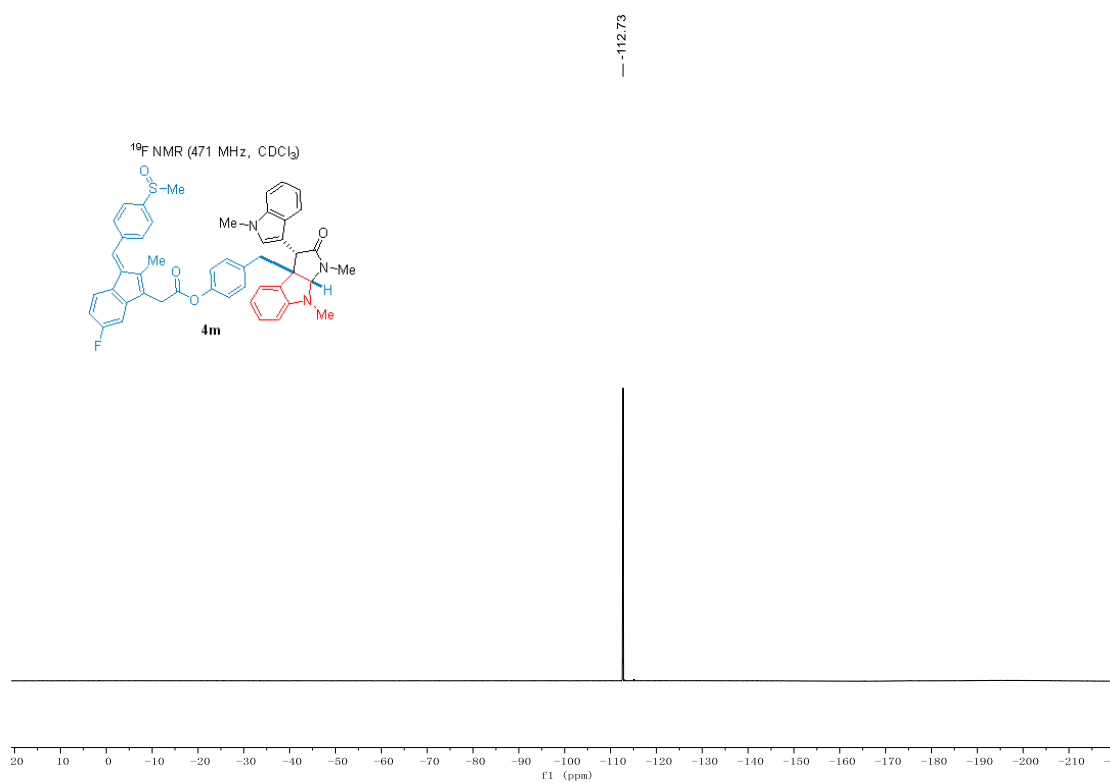

**1,3a,8,8a-tetramethyl-3-(1-methyl-1*H*-indol-3-yl)-3,3a,8,8a-tetrahydropyrrolo[2,3-*b*]indol-2(1*H*)-one (4n):**

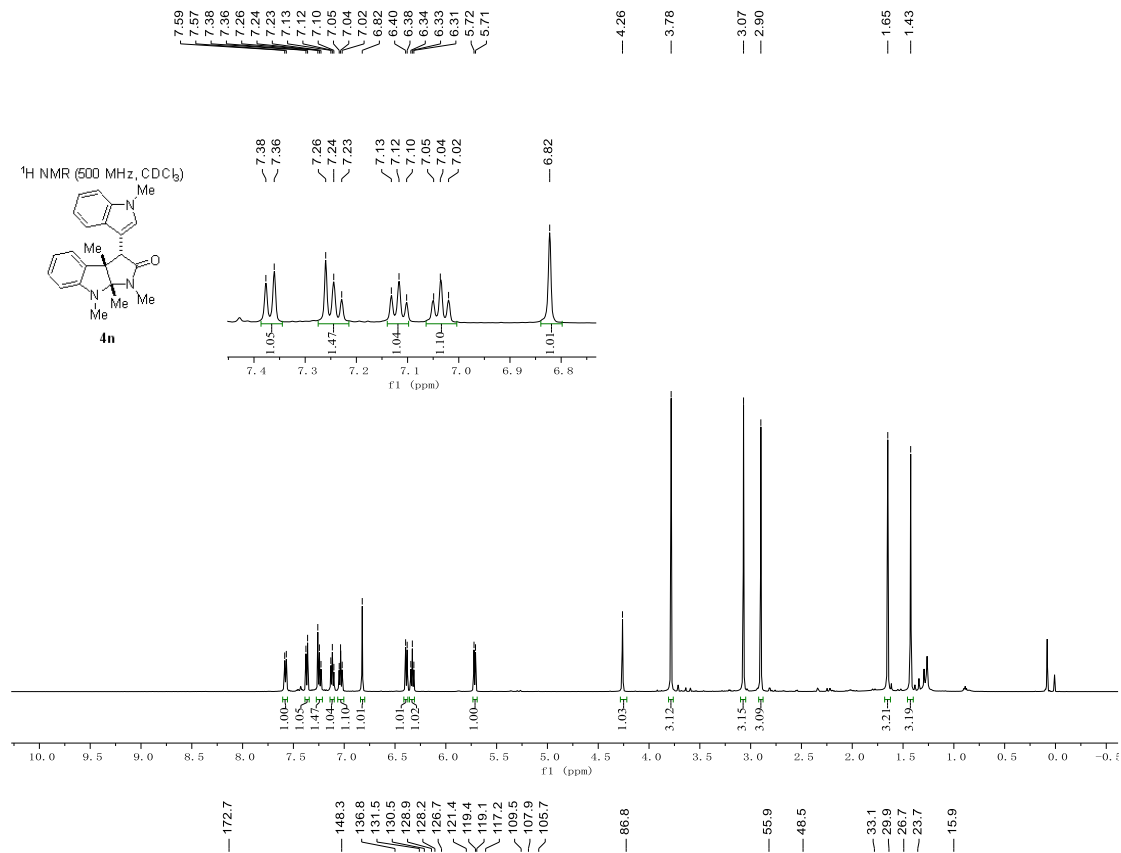

**3-(1-allyl-1*H*-indol-3-yl)-1,3a,8-trimethyl-3,3a,8,8a-tetrahydropyrrolo[2,3-*b*]indol-2(1*H*)-one(5a):**

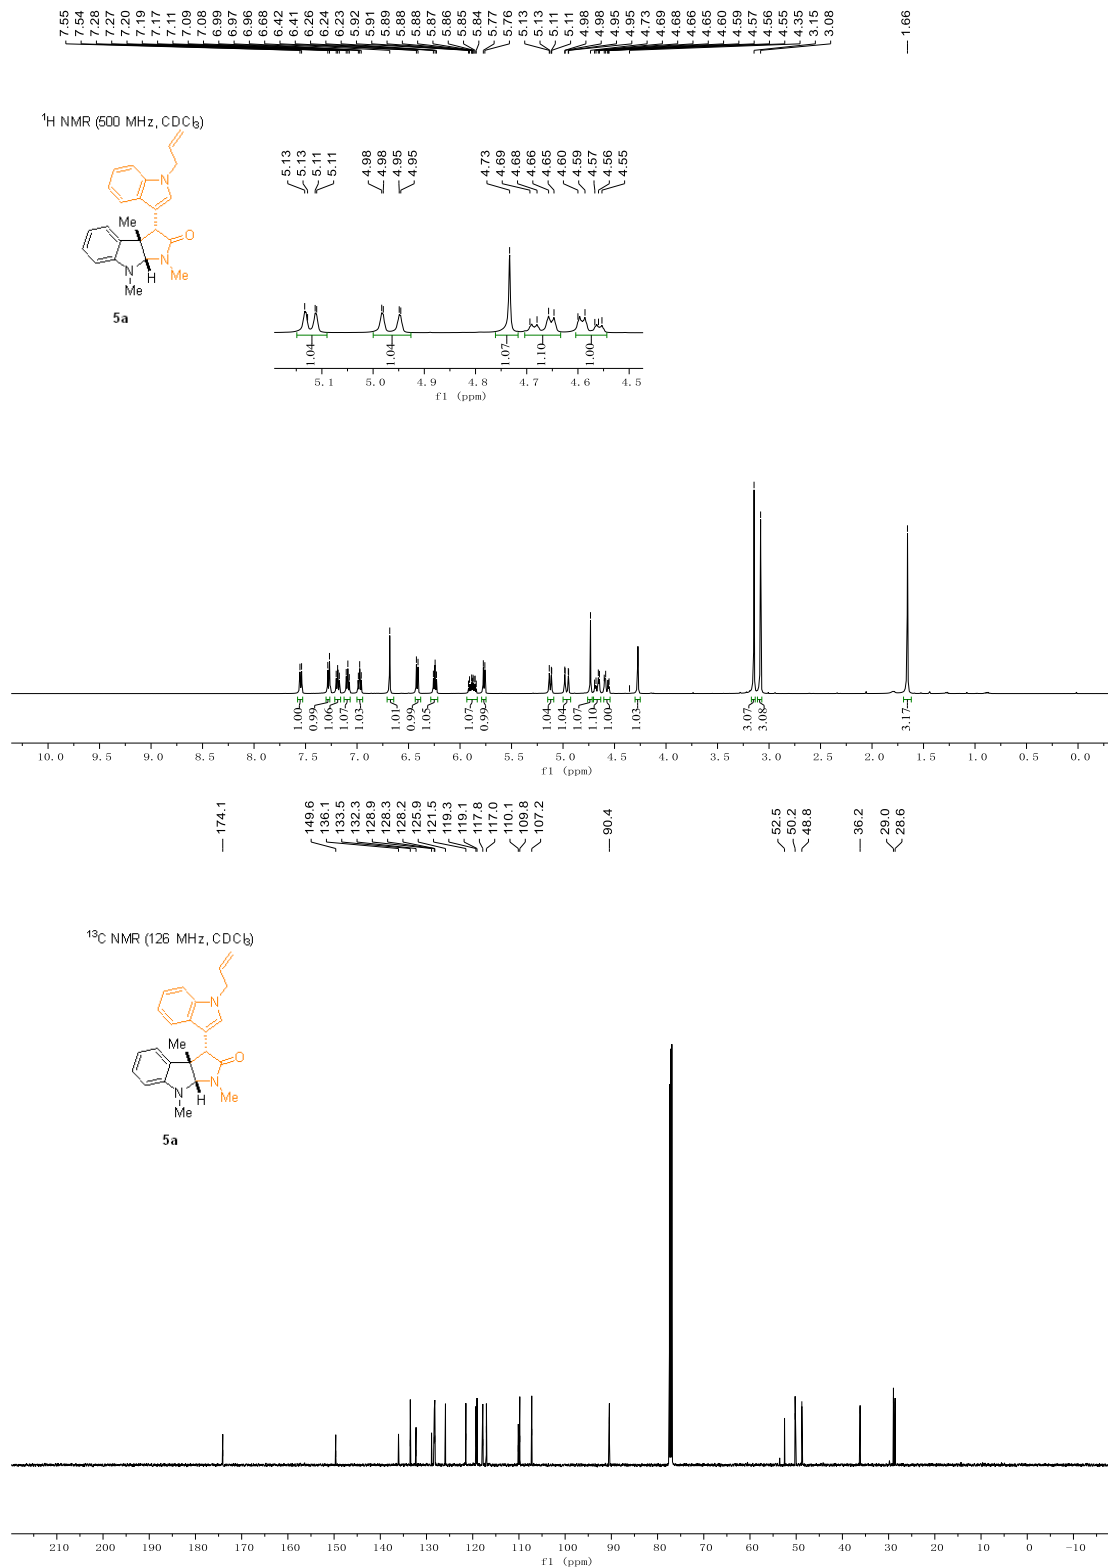

**3-(1-benzyl-1*H*-indol-3-yl)-1,3a,8-trimethyl-3,3a,8,8a-tetrahydropyrrolo[2,3-*b*]indol-2(1*H*)-one (5b):**

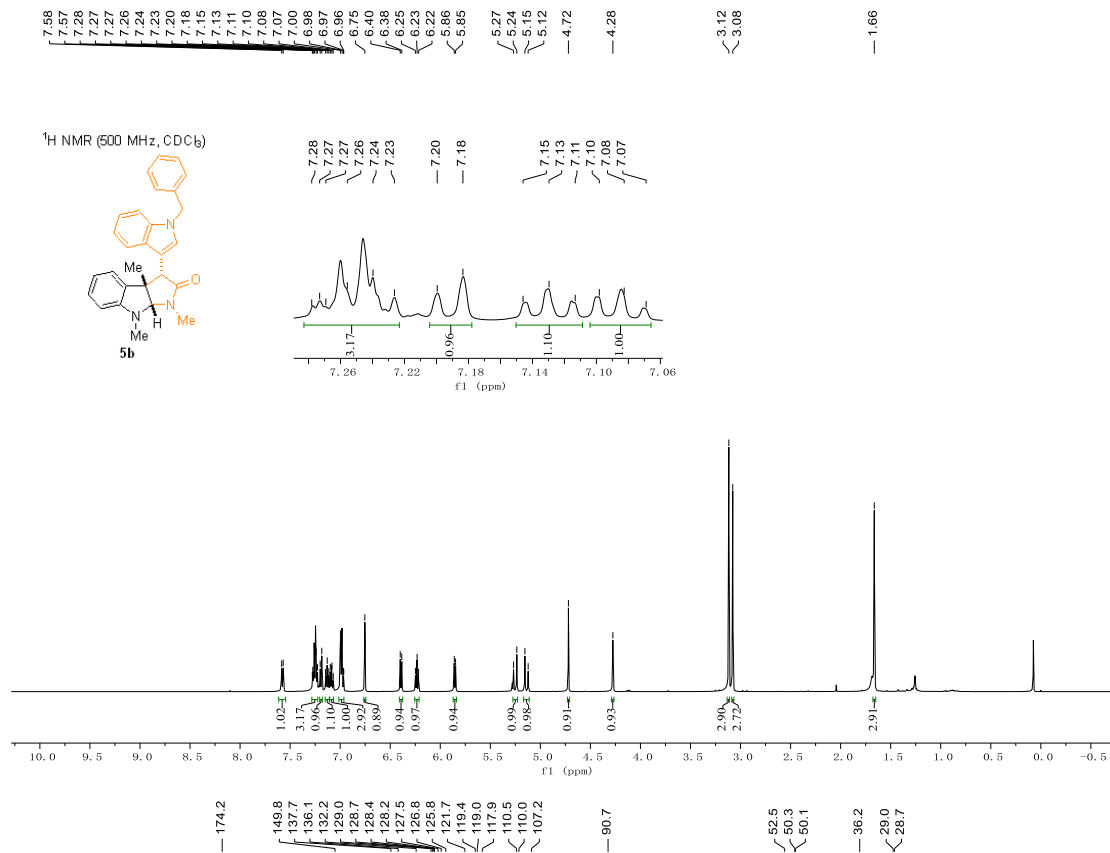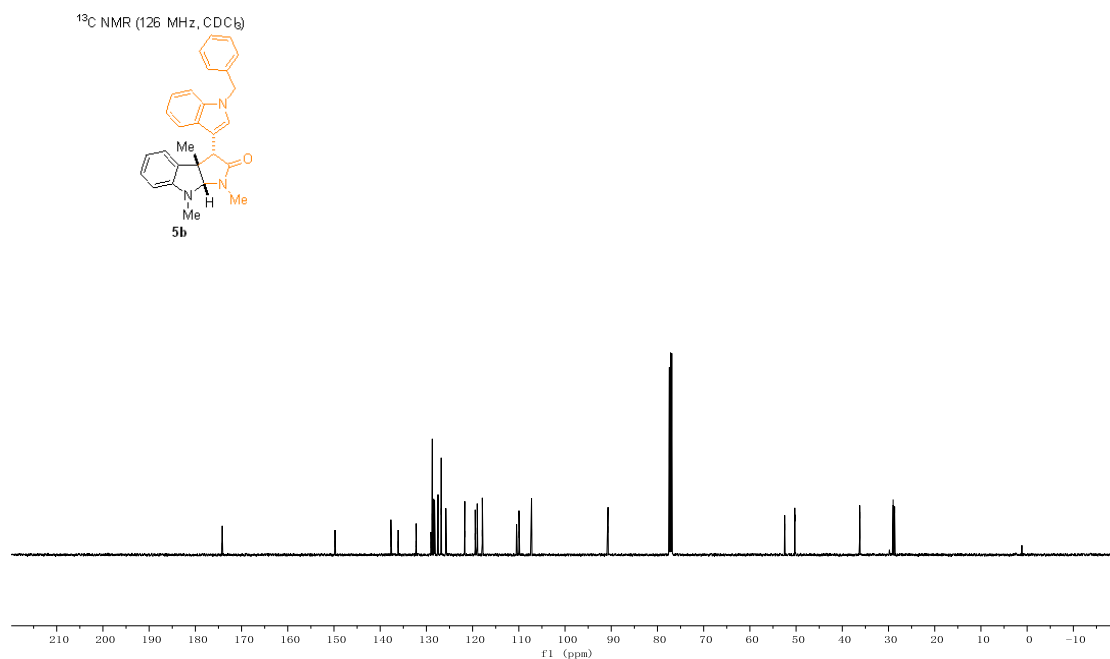



**3-(6-fluoro-1-methyl-1*H*-indol-3-yl)-1,3*a*,8-trimethyl-3,3*a*,8*a*-tetrahydropyrrolo[2,3-*b*]indol-2(1*H*)-one(5c):**

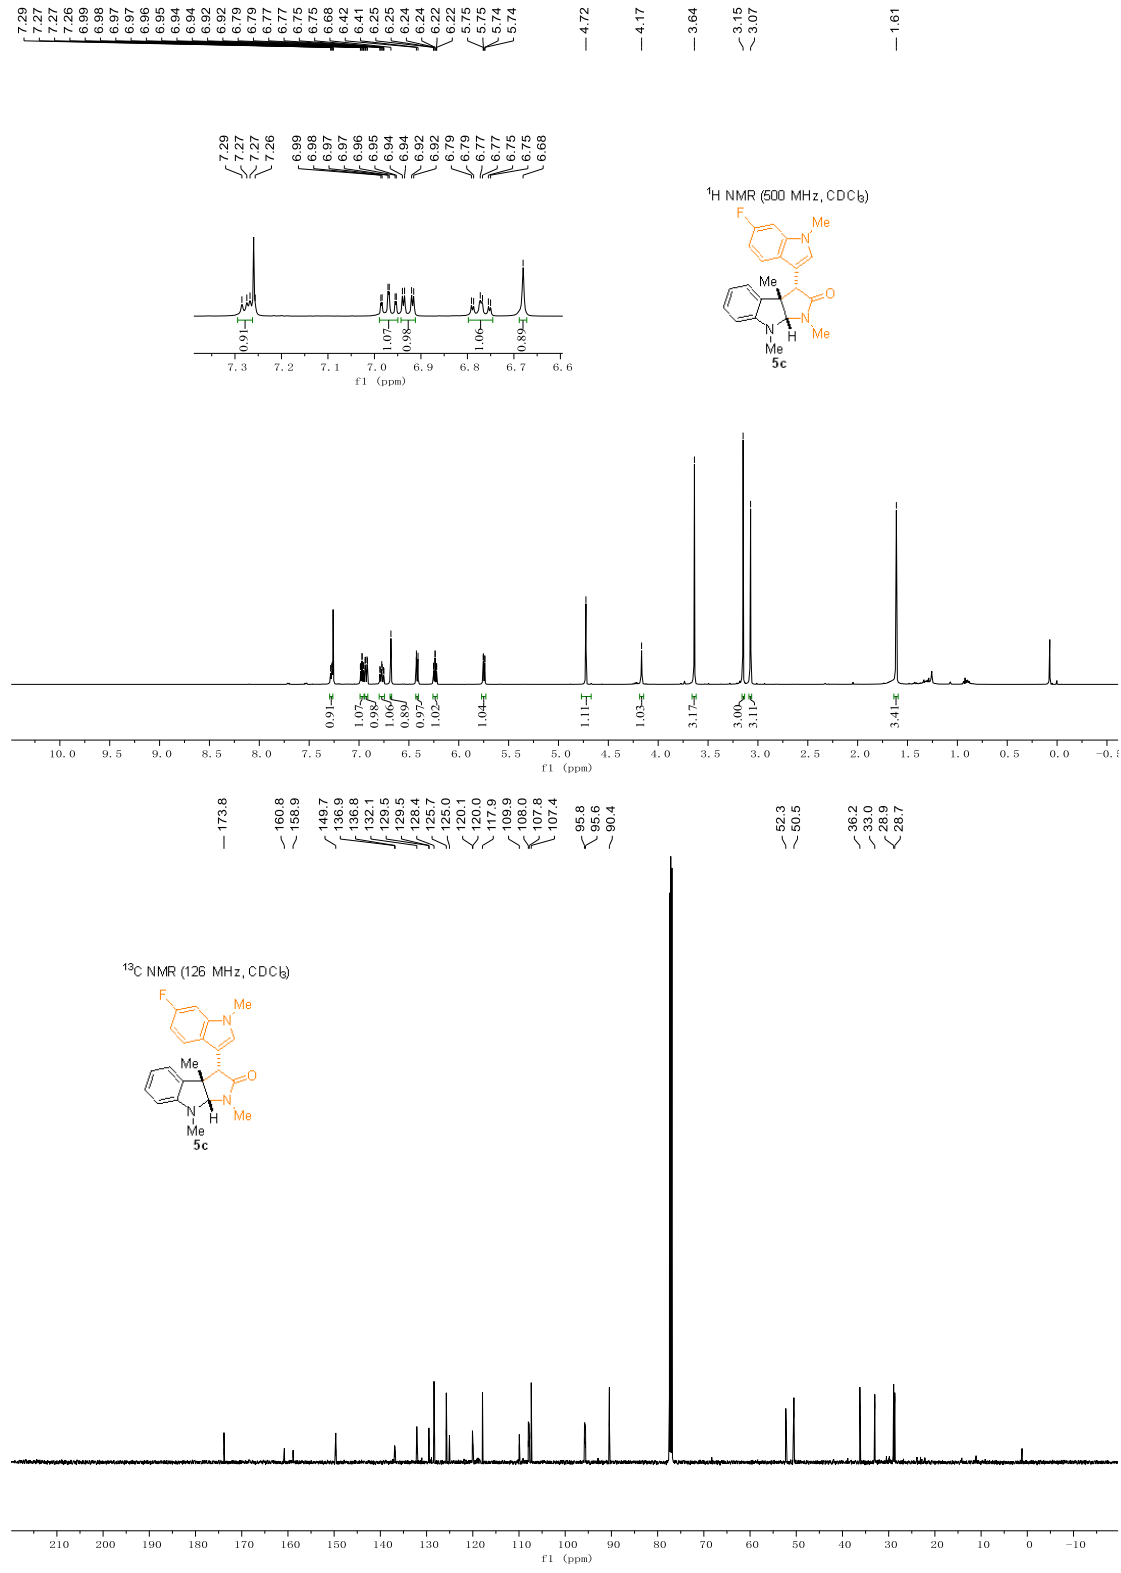

<sup>19</sup>F NMR (471 MHz, CDCl<sub>3</sub>)

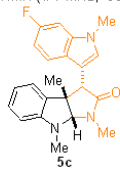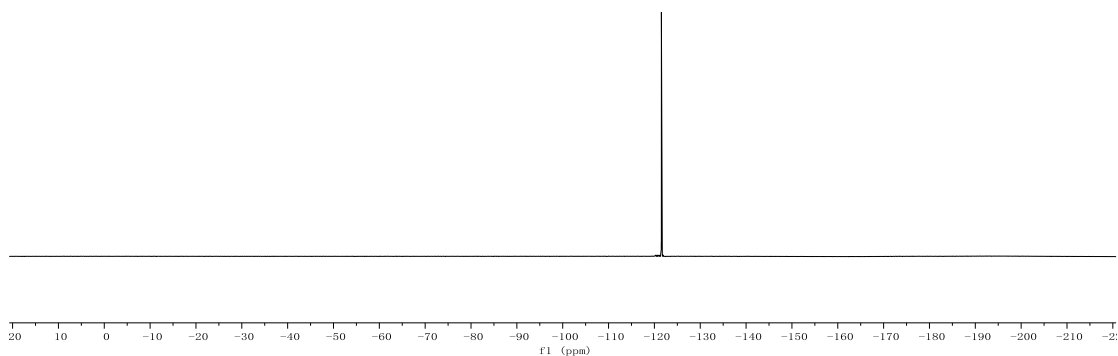

**3-(6-chloro-1-methyl-1*H*-indol-3-yl)-1,3*a*,8-trimethyl-3,3*a*,8,8*a*-tetrahydropyrrolo[2,3-*b*]indol-2(1*H*)-one(5d):**

7.31 7.29 7.26 7.00 6.99 6.98 6.97 6.88 6.84 6.42 6.41 6.26 6.25 6.24 6.23 6.23 5.73 5.71 5.71 4.72 4.17 3.65 3.15 3.07 1.61

<sup>1</sup>H NMR (500 MHz, CDCl<sub>3</sub>)

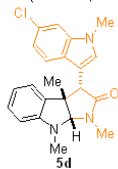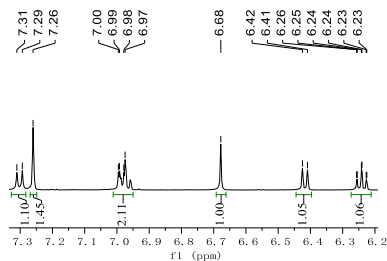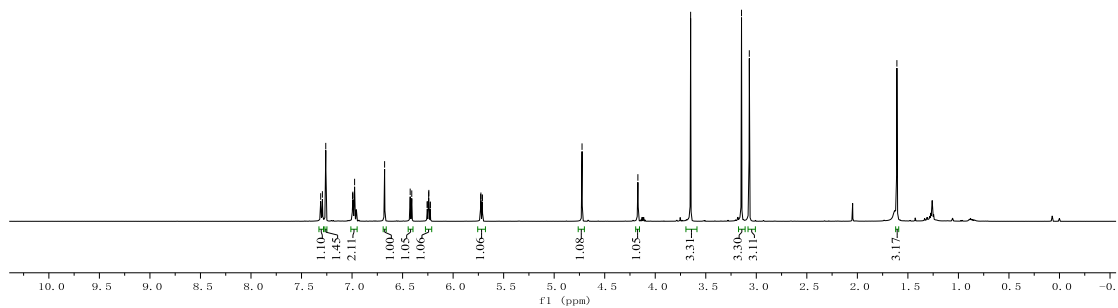

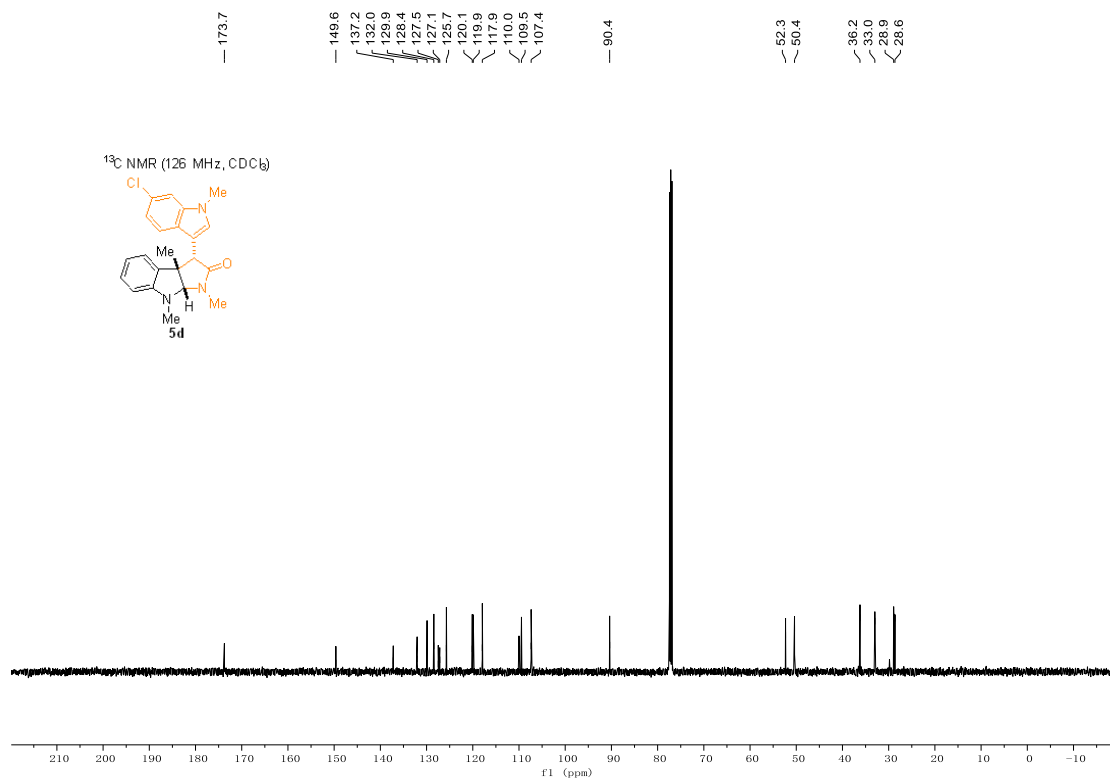

**3-(5-bromo-1-methyl-1*H*-indol-3-yl)-1,3a,8-trimethyl-3,3a,8,8a-tetrahydropyrrolo[2,3-*b*]indol-2(1*H*)-one(5e):**

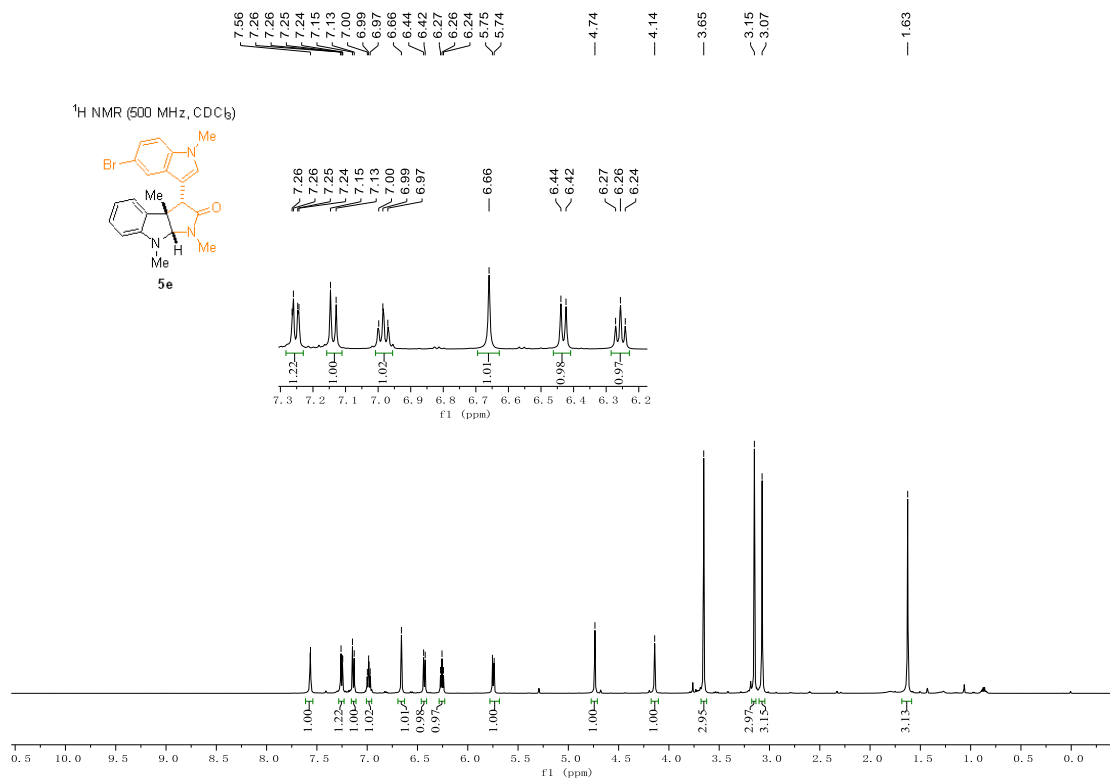

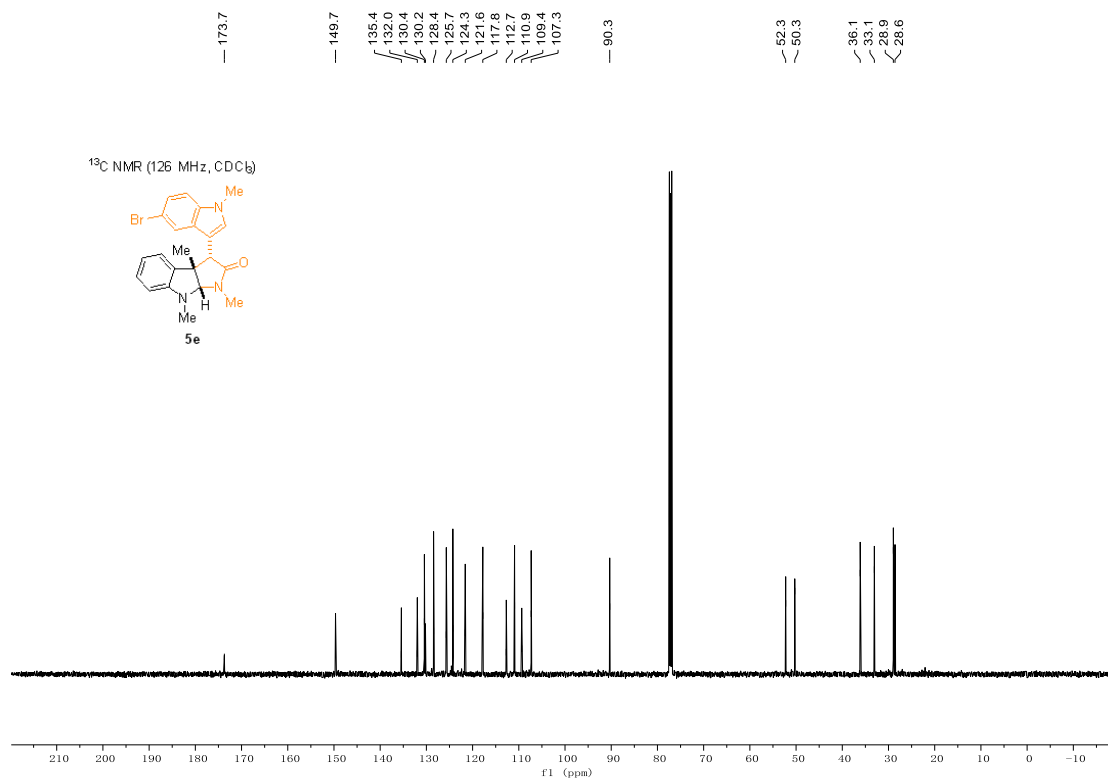

**1,3a,8-trimethyl-3-(1-methyl-1*H*-indol-3-yl)-1,2,3,3a,8,8a-hexahydropyrrolo[2,3-*b*]indole(6a):**

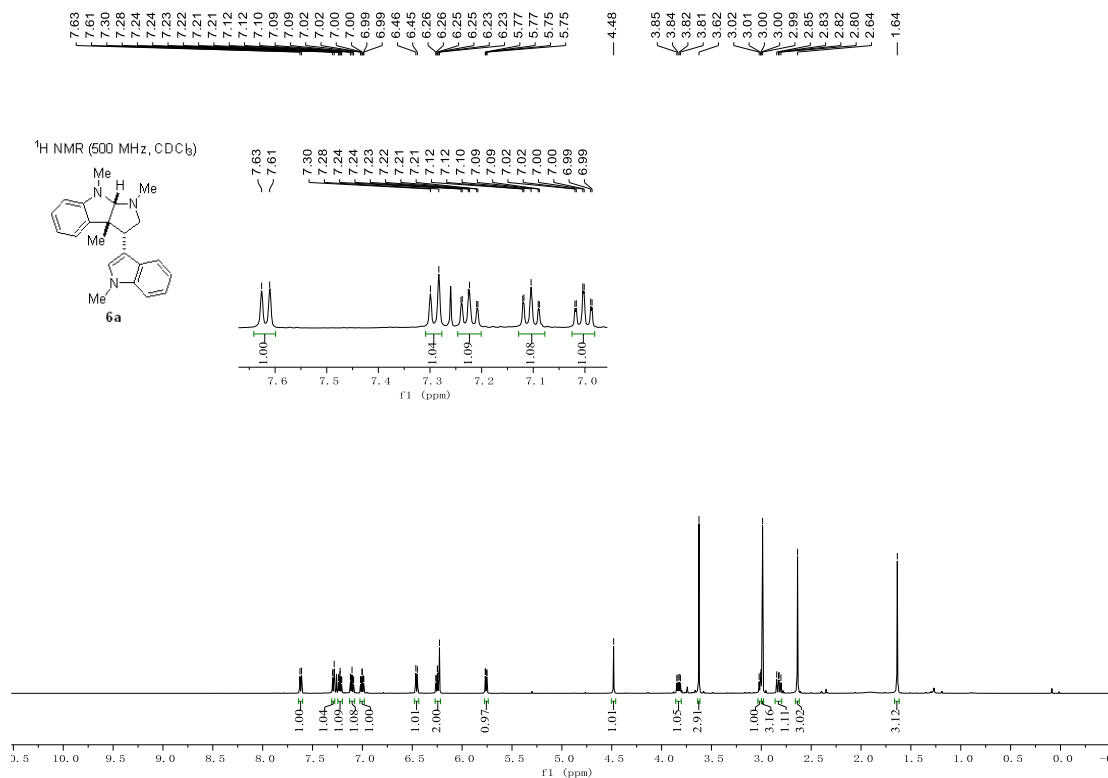

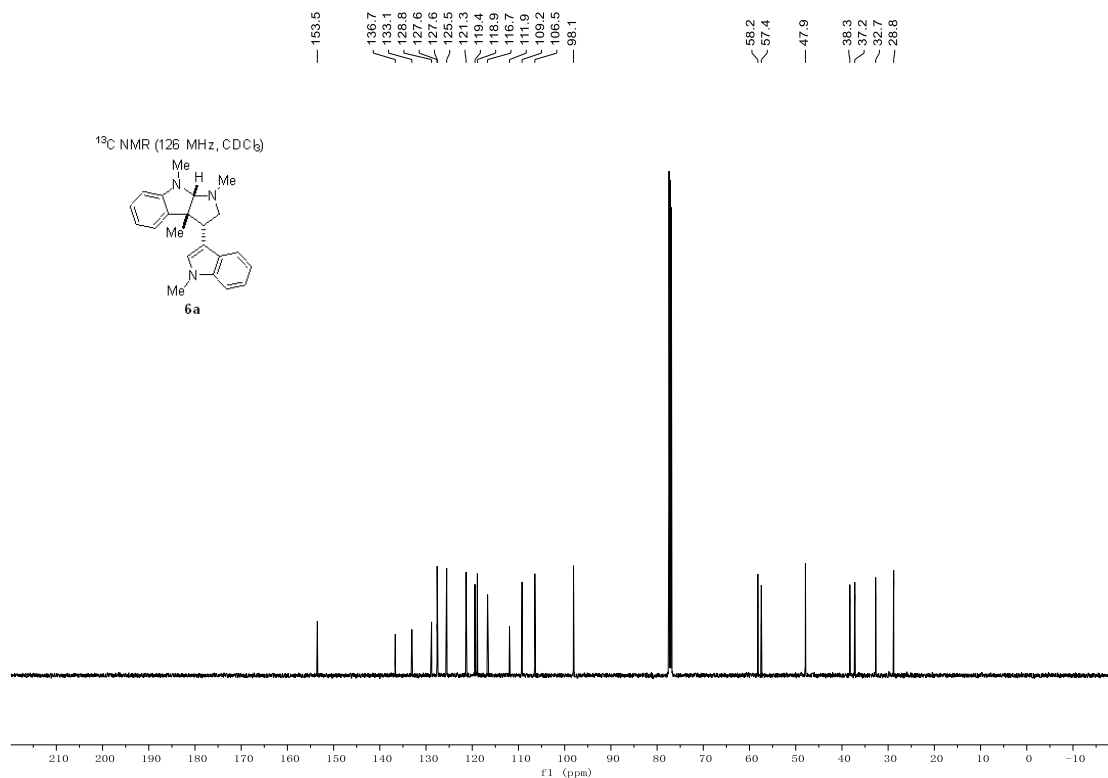

**3a-hydroxy-1,8,8a-trimethyl-3,3a,8,8a-tetrahydropyrrolo[2,3-*b*]indol-2(1*H*)-one (7):**

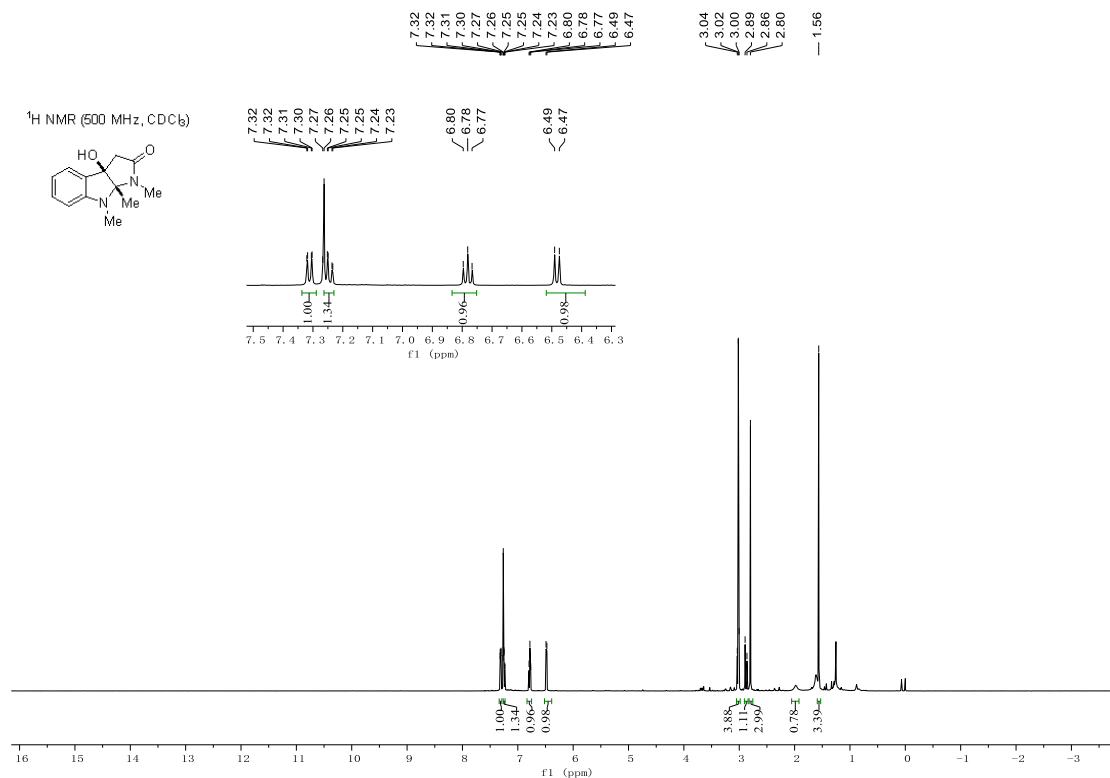

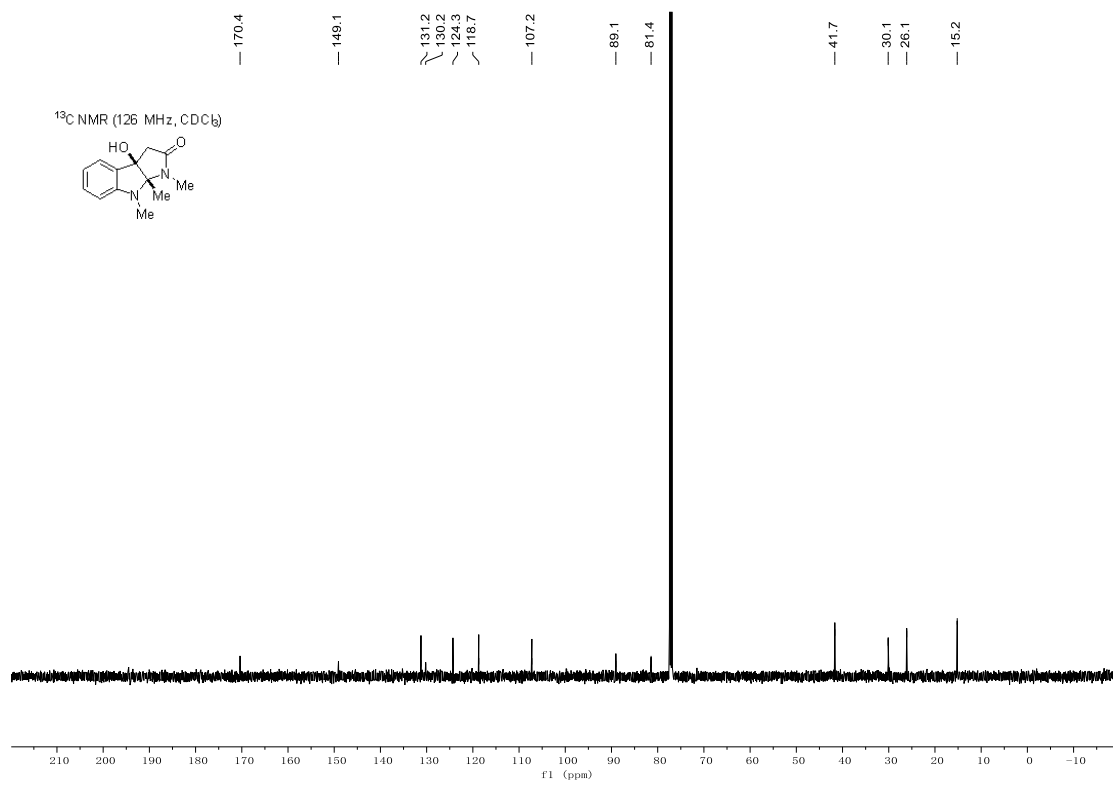

Supplement: d4qo01118j1.pdf [file d4qo01118j1.pdf]
